# Supplementary material for: Risk of COVID-19 hospital admission and COVID-19 mortality during the first COVID-19 wave with a special emphasis on ethnic minorities: an observational study of a single, deprived, multiethnic UK health economy
Source: PubMed Central journal article supplement — BMJ Open. 2021 Feb 17;11(2):e046556. doi: 10.1136/bmjopen-2020-046556 (PMC7893203; doi:10.1136/bmjopen-2020-046556), 2021-02-17
Supplement: bmjopen-2020-046556.draft_revisions.pdf [file bmjopen-2020-046556.draft_revisions.pdf]

# BMJ Open

BMJ Open is committed to open peer review. As part of this commitment we make the peer review history of every article we publish publicly available.

When an article is published we post the peer reviewers' comments and the authors' responses online. We also post the versions of the paper that were used during peer review. These are the versions that the peer review comments apply to.

The versions of the paper that follow are the versions that were submitted during the peer review process. They are not the versions of record or the final published versions. They should not be cited or distributed as the published version of this manuscript.

BMJ Open is an open access journal and the full, final, typeset and author-corrected version of record of the manuscript is available on our site with no access controls, subscription charges or pay-per-view fees (<http://bmjopen.bmj.com>).

If you have any questions on BMJ Open's open peer review process please email [info.bmjopen@bmj.com](mailto:info.bmjopen@bmj.com)

# BMJ Open

**The risk of COVID hospital admission and COVID mortality during the first COVID 19 wave with a special emphasis on Ethnic Minorities: an observational study of a single, deprived, multi ethnic UK health economy**

|                               |                                                                                                                                                                                                                                                                                                                                                                                                                                                                                                                                                                                                                                                                                                                                      |
|-------------------------------|--------------------------------------------------------------------------------------------------------------------------------------------------------------------------------------------------------------------------------------------------------------------------------------------------------------------------------------------------------------------------------------------------------------------------------------------------------------------------------------------------------------------------------------------------------------------------------------------------------------------------------------------------------------------------------------------------------------------------------------|
| Journal:                      | <i>BMJ Open</i>                                                                                                                                                                                                                                                                                                                                                                                                                                                                                                                                                                                                                                                                                                                      |
| Manuscript ID                 | bmjopen-2020-046556                                                                                                                                                                                                                                                                                                                                                                                                                                                                                                                                                                                                                                                                                                                  |
| Article Type:                 | Original research                                                                                                                                                                                                                                                                                                                                                                                                                                                                                                                                                                                                                                                                                                                    |
| Date Submitted by the Author: | 02-Nov-2020                                                                                                                                                                                                                                                                                                                                                                                                                                                                                                                                                                                                                                                                                                                          |
| Complete List of Authors:     | Singh, Baldev; Royal Wolverhampton Hospitals NHS Trust, New Cross Hospital; University of Wolverhampton, School of Medicine & Clinical Practice<br>Bateman, James; Royal Wolverhampton Hospitals NHS Trust, New Cross Hospital<br>Viswanath, Ananth; Royal Wolverhampton Hospitals NHS Trust, New Cross Hospital<br>Klaire, Vijay; Royal Wolverhampton Hospitals NHS Trust, New Cross Hospital<br>Mahmud, Sultan; Royal Wolverhampton Hospitals NHS Trust, New Cross Hospital; Birmingham City University, Faculty of Health, Education & Life Sciences<br>Nevill, Alan; University of Wolverhampton, Faculty of Education Health & Wellbeing<br>Dunmore, Simon; University of Wolverhampton, School of Medicine & Clinical Practice |
| Keywords:                     | EPIDEMIOLOGY, PUBLIC HEALTH, COVID-19                                                                                                                                                                                                                                                                                                                                                                                                                                                                                                                                                                                                                                                                                                |
|                               |                                                                                                                                                                                                                                                                                                                                                                                                                                                                                                                                                                                                                                                                                                                                      |

SCHOLARONE™  
Manuscripts

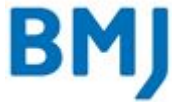

I, the Submitting Author has the right to grant and does grant on behalf of all authors of the Work (as defined in the below author licence), an exclusive licence and/or a non-exclusive licence for contributions from authors who are: i) UK Crown employees; ii) where BMJ has agreed a CC-BY licence shall apply, and/or iii) in accordance with the terms applicable for US Federal Government officers or employees acting as part of their official duties; on a worldwide, perpetual, irrevocable, royalty-free basis to BMJ Publishing Group Ltd ("BMJ") its licensees and where the relevant Journal is co-owned by BMJ to the co-owners of the Journal, to publish the Work in this journal and any other BMJ products and to exploit all rights, as set out in our [licence](#).

The Submitting Author accepts and understands that any supply made under these terms is made by BMJ to the Submitting Author unless you are acting as an employee on behalf of your employer or a postgraduate student of an affiliated institution which is paying any applicable article publishing charge ("APC") for Open Access articles. Where the Submitting Author wishes to make the Work available on an Open Access basis (and intends to pay the relevant APC), the terms of reuse of such Open Access shall be governed by a Creative Commons licence – details of these licences and which [Creative Commons](#) licence will apply to this Work are set out in our licence referred to above.

Other than as permitted in any relevant BMJ Author's Self Archiving Policies, I confirm this Work has not been accepted for publication elsewhere, is not being considered for publication elsewhere and does not duplicate material already published. I confirm all authors consent to publication of this Work and authorise the granting of this licence.

1 **Title**

2  
3  
4  
5  
6  
7 The risk of COVID hospital admission and COVID mortality during the first COVID 19 wave with a special emphasis on  
8 Ethnic Minorities: an observational study of a single, deprived, multi ethnic UK health economy.  
9

10  
11  
12  
13  
14 **Authors**

15  
16  
17 Baldev M SINGH, James BATEMAN (0000-0003-1952-2821), Ananth VISWANATH, Vijay KLAIRE, Sultan MAHMUD,  
18 Alan M NEVILL (0000-0003-0506-3652), Simon J DUNMORE (0000-0001-7227-5597)  
19  
20  
21  
22  
23

24 **Addresses, positions**

25  
26  
27 The Royal Wolverhampton NHS Trust, New Cross Hospital, Wolverhampton, WV10 0QP, UK; Professor  
28 Baldev M Singh, Consultant; Dr James Bateman, Consultant; Dr Ananth Viswanath, Consultant; Professor  
29 Sultan Mahmud, Director of Innovation, Integration and Research; Vijay Klaire, Integrated Care Business  
30 Intelligence Lead  
31  
32  
33

34  
35 School of Medicine and Clinical Practice, Faculty of Science and Engineering, University of Wolverhampton,  
36 Wolverhampton, WV1 1LY, UK; Dr Simon J Dunmore, Reader; Professor Baldev M Singh, Medical Director  
37  
38

39 Faculty of Health, Education & Life Sciences, Birmingham City University, Birmingham, B15 3TN; Professor  
40 Sultan Mahmud, Professor  
41  
42  
43

44 Faculty of Education Health & Wellbeing, University of Wolverhampton, Walsall Campus, Walsall, WS1 3BD,  
45 UK; Professor Alan M Nevill, Professor  
46  
47  
48  
49  
50

51 **Key words:** Hospital; admission; mortality, COVID-19; ethnicity; deprivation; co-morbidity  
52  
53  
54  
55  
56  
57  
58  
59  
60

1 **Corresponding Author & Guarantor:**  
2  
3

4 Professor Baldev M SINGH, The Royal Wolverhampton NHS Trust, New Cross Hospital, Wolverhampton, WV10 0QP,  
5 UK & School of Medicine and Clinical Practice, Faculty of Science and Engineering, University of Wolverhampton,  
6 Wolverhampton, WV1 1LY, UK; email: [baldev.singh@nhs.net](mailto:baldev.singh@nhs.net)  
7  
8  
9

10 **Copyright:** The Corresponding Author has the right to grant on behalf of all authors and does grant on behalf of all  
11 authors, an exclusive licence on a worldwide basis to the BMJ Publishing Group Ltd to permit this article (if accepted)  
12 to be published in BMJ editions and any other BMJ PGL products and sublicences such use and exploit all subsidiary  
13 rights, as set out in our licence  
14  
15  
16  
17  
18  
19  
20  
21  
22  
23  
24  
25  
26  
27  
28  
29  
30  
31  
32  
33  
34  
35  
36  
37  
38  
39  
40  
41  
42  
43  
44  
45  
46  
47  
48  
49  
50  
51  
52  
53  
54  
55  
56  
57  
58  
59  
60

For peer review only

## Abstract

### Objectives

To address the generalisability of COVID-19's outcomes to the well-defined but diverse communities of a single City area.

### Design

An observational study of COVID-19 outcomes using quality-assured and integrated data from a single UK hospital contextualised to its feeder population and its associated factors (comorbidities, ethnicity, age, deprivation).

### Setting/Participants

Single city hospital with a feeder population of 228,632 adults in Wolverhampton's city area.

### Main Outcome Measures

Hospital admissions and mortality.

### Results

5558 patients admitted, 686 died (556 in hospital); 930 were COVID-19 admissions (CA), of which 270 were hospital COVID deaths, 47 non-COVID deaths, 36 deaths post-discharge; 4628 non-COVID-19 admissions (NCA), 239 in-hospital deaths (2 COVID), 94 deaths post-discharge. 223,074 adults not admitted, 407 died. Age, gender, multi-morbidity and Black ethnicity (OR 2.1 [95% CI 1.5-3.2]  $p < 0.001$ , absolute excess risk of  $< 1/1,000$ ) were associated with COVID-19 admission and mortality. The South Asian cohort had lower CA and NCA, lower mortality (CA (0.5 [0.3-0.8],  $p < 0.01$ ), NCA (0.4 [0.3-0.6]  $p < 0.001$ ), community deaths (0.5 [0.3-0.7]  $p < 0.001$ ). Despite many common risk factors for CA and NCA, ethnic groups had different admission rates, and within-groups differing association of risk factors. Deprivation impacted only in White ethnicity, in the oldest age bracket and in a lesser (not most) deprived quintile.

### Conclusions

Wolverhampton's results, reflecting high ethnic diversity and deprivation, are similar to other studies for Black ethnicity, age and comorbidity risk in COVID-19 but strikingly different in South Asians and for deprivation. Sequentially considering population and then hospital based NCA and CA outcomes, we present a complete single health-economy picture. Risk factors may differ within ethnic groups; our data may be more representative of communities with high BAME populations, highlighting the need for locally focussed public health strategies. We emphasise the need for a more comprehensible and nuanced conveyance of risk.

**Strengths and limitations of this study**

- The rapidly developing COVID-19 pandemic has led to numerous studies (published, preprints and national public health reports) of its health impacts in relation to ethnicity, co-morbidities and other factors; few studies, however, have attempted to evaluate infection patient data in terms of morbidity and mortality in context of the feeder population and most are limited by incompleteness of data and inability to account for regional variations in factors such as ethnicity and deprivation
- Our observational study used a high quality and complete dataset from the local population and the hospital serving it to examine the association of purported risk factors with severity and mortality and the results reveal the importance of evaluating such risks in the local, and not just national, population setting taking into account the local variations in patient backgrounds
- We found an increased risk of COVID-19 mortality for Black ethnicity (OR 2.1) but a decreased risk (OR 0.5) for South Asians, compared with white ethnicity; Our analysis reveals that a nuanced approach to studying risk factors associated with COVID-19 severity and mortality is important – factoring in regional variation in ethnicity, deprivation etc. specifically linked to the source population
- We suggest, based on our findings, that understandably rapid analysis and dissemination of studies of COVID-19 risk needs to be tempered by careful consideration of the real implications; we further urge caution in conveying risk messages to the wider community because of an ethical imperative to ensure such messages do not lead to unnecessary fear and deter individuals, particularly from specific ethnic backgrounds, from seeking needed medical assistance.

## Introduction

In understanding the natural history of disease, fundamental to healthcare, the COVID-19 (hereafter referred to as “COVID”) pandemic highlights issues within data repositories. Constructing multiple source datasets has complexity in case definition, data acquisition, integration, quality, completeness, coding accuracy and the clinical meaning of analysis outcomes.<sup>1-4</sup> Emphasising this challenge, national UK data were initially collated via the Patient Notification System, requiring a positive swab test up until the 28<sup>th</sup> April 2020 but revised to include clinical definitions given an estimated false negative rate testing rate of up to 29%.<sup>5-8</sup> Well-established primary care databases, may have significant inaccuracy and do not include hospital secondary care information.<sup>9</sup> A large UK primary care epidemiological study also used national COVID (SARS-CoV-2) positive swab cases for case definition.<sup>2</sup> Conversely, secondary care case series and international registry studies for specific diseases are not linked to primary care datasets.<sup>10-14</sup> Therefore important caveats exist in utilising and interpreting such data and drawing clinically important conclusions regarding the adverse associations of ethnicity with outcomes.<sup>2, 15</sup>

Our objective, therefore, was to establish a tightly governed comprehensive, multi-source, integrated, quality assured local structured clinical data set, used for the purposes of direct care, define cohorts at risk, to systematically improve clinical coding and mortality recording accuracy, and to enable an informed understanding of factors influencing hospital activity, including admissions. This approach should ultimately inform public health initiatives. We present a proof of principle study to evaluate the utility of this approach in relation to a single UK city wide health district, reporting our findings regarding population wide factors that may have an association with 2 key COVID outcomes, hospital admission and mortality, over the first 12 weeks of the pandemic in this City.

## Methods

### General Method

The time frame spanned 1/3/2020 to 24/05/2020.

Data were integrated into an SQL database from primary care, community and hospital clinical and pathology systems for all people resident in Wolverhampton or registered to Wolverhampton practices and those from immediately adjacent districts with emergency admission to New Cross Hospital (NXH). Only those alive at the start point were included and subsequently death and date of death were tracked. The final total population aged >18 was 228,632, of whom 1063 were resident but not Wolverhampton GP registered, 1521 who were registered but not City resident and 1026 neither resident nor registered from immediately surrounding areas with an emergency admission to NXH, such that 99.5% of the cohort were registered and/or resident constituting 88% of COVID admissions and 91% COVID deaths. The Index of Multiple Deprivation was allocated according to postcode. Unavailable smoking status (15%) was reallocated to “non-smoker”. Missing body mass index (22%) were replaced by the age-related (5-year band) mean value in the cohort. Ethnicity data from all sources were reviewed, only unambiguous data were accepted, and recoded into Caucasian (White), South-Asian, Black, Mixed Ethnicity



Chinese with 7.5% remaining “Unknown”. Comorbidities were accrued and cross-checked from primary care and hospital coding to include: Asthma, COPD, Diabetes, Hypertension, Coronary Artery Disease, Stroke and Peripheral Arterial Disease, Chronic Heart Failure, Atrial Fibrillation, Chronic Kidney Disease, Cancer, Dementia, Depression, other Mental Health Disorders, Epilepsy, Learning Difficulties, Osteoarthritis, Rheumatoid arthritis as well as recorded nursing home residency and palliative care status. Non-elective admissions over the preceding 12 months were ascertained. During admission, the COVID clinical status was recorded by the Infection Diseases team or the clinical team in daily updates as “COVID definite”, “COVID probable” or “not COVID”. Formal endpoint coding was in duplicate with a rolling triangulation audit in place comparing the clinical diagnosis, the coded diagnosis and COVID pathology status for coding accuracy. Mortality and cause of death were certified in our Medical Examiner System and also continuously cross-checked against the coded status. COVID coding and death certification arbitration were supported by the accountable senior responsible consultant (AV). Further validation against the National Strategic Tracing Service captured deaths outside hospital.

### Statistical Analysis

This was undertaken in SPSS v26. Factors analysis of all variables considered confounding effects and redundancy, yielding a 9 component rotated solution explaining 48% of the variance: deprivation and ethnicity were strongly co-associated in a single component whilst the two principal outcome measures of hospital admission and mortality were in another distinct component. We adopted a multinomial regression analysis approach. The analysis was undertaken sequentially to ensure an *a priori* justification for further analysis. Statistical tests are described in the text and their results considered significant at  $p < 0.05$ .

### Ethical Approval

This was not sought nor deemed necessary since this work represents a continuous quality improvement programme of the informatics component of service changes required between various local NHS organisations for integrated working stipulated during the COVID 19 emergency. Data governance was in line Trust policy and with the COVID emergency directive of NHS England.

**Patient and Public Involvement:** None (not applicable to this type of study)

## Results

### Hospital Admissions

The population characteristics are shown in Table 1, grouped according to admission status (No Admission, Non-COVID Admission and COVID Admission (NA, NCA, CA respectively) together with their mortality rates. Compared

1 to NA, there was an increased association of all variables from NCA through to CA including age, the number of  
2 comorbidities, most individual comorbidities, the surrogate measures of dependency, and prior history of emergency  
3 admissions. Male gender, BMI, IMD and smoking status were significantly different. Ethnic minority groupings were  
4 significantly different between admission types with the South Asian population prevalence in CA being 46% of that  
5 in the comparator NA population whilst the Black population appeared to have a 56% excess. Table 2 gives further  
6 numerical detail.  
7  
8  
9  
10

11  
12 The 3 hospital admissions categories (NA, NCA, CA) were taken as the response variable and submitted to  
13 multinomial regression (Table 3). The complete model was highly significant ( $\chi^2=8,869.1$ ,  $p<0.001$ ). Male gender was  
14 more prevalent in CA. Age distribution (Figure 1a) differed significantly for CA and NCA versus NA, and the two  
15 admission groups differed significantly from each other, reflecting the higher mean age in CA. The pattern for  
16 deprivation (Figure 1b) showed the peak admission rates to be in the second least deprived quintile with the most  
17 deprived quintile not being significantly different from the least deprived quintile, whilst the 2 admission groups did  
18 not differ significantly from each other in this regard. There was a decreased relative risk for admission in either  
19 group with current or previous smoking. Both admission groupings had a significantly increased history of prior  
20 emergency admissions, established multi-morbidity, being nursing home resident or in a palliative phase of care with  
21 these latter two characteristics in significantly higher prevalence in CA compared to NCA. Both groups shared  
22 individual comorbidities in higher risk, but with some differential effect for diabetes, hypertension, atrial fibrillation  
23 and peripheral vascular disease which were increased in CA.  
24  
25  
26  
27  
28  
29  
30  
31  
32  
33

34 The South Asian ethnic group was less likely to have a CA or NCA (60% and 50% crude percentage reduced risk  
35 respectively) compared to the White ethnic reference category whilst the Black ethnic group shared the significant  
36 propensity not to have an NCA but had a markedly increased relative risk (70%) for CA. Ethnicity related outcomes  
37 were examined specifically amongst those with COVID admission, by comparing those admitted to those not  
38 admitted within their ethnic category in separate binary regression analyses (all  $\chi^2 >252.4$ ,  $p<0.001$ ) (Table 4). Age,  
39 gender, preceding emergency admissions, palliative phase, comorbidity, and nursing home residence were  
40 significant associations in 2 or more of the ethnic groups. Of note, patterns of significantly associated individual  
41 comorbidities were different between the ethnic groups: Black - hypertension, atrial fibrillation and cardiac failure;  
42 South Asian - diabetes, peripheral vascular disease and atrial fibrillation; White - specific association with COPD, CKD,  
43 and RA. Deprivation had a significant impact only in the White group. The inter-relationship of age, deprivation with  
44 ethnicity and the impact of white ethnicity in the oldest quintile in lesser deprived categories can be seen in Figure  
45 1c. In a simplified model of admission type and ethnicity ( $\chi^2=4542.9$ ,  $p<0.001$ ) with only age and deprivation entered  
46 categorically together with their interaction ( $\chi^2= 412.7$ ,  $p<0.001$ ), the ORs for CA compared to Whites were Black  
47 2.08 (1.70 - 2.57) ( $p<0.001$ ) and South Asian 0.56 (0.44 – 0.70) ( $p<0.001$ ), with both groups still less likely to have  
48 NCA ( $p<0.001$ ).  
49  
50  
51  
52  
53  
54  
55  
56  
57  
58  
59  
60

### **Absolute risk of COVID Admission within Ethnic groups**

1 The absolute risk from COVID hospital admission was 4.8 / 1000 population and Table 2 shows this broken down by  
2 ethnic grouping giving numbers, percentages, absolute risk and excess risk with unadjusted ORs compared to the  
3 White group, with the South Asian group showing a lower and the Black group a higher absolute risk as reflected in  
4 the unadjusted ORs.  
5  
6  
7

### 8 **Mortality outcomes**

9  
10  
11 COVID and non-COVID hospital death and death in the community (CHD, NCHD, DIC) were analysed in stepwise  
12 backwards multinomial regression ( $\chi^2=5,548.3$ ,  $p<0.001$ ) (Table 5). Male gender was significantly positively  
13 associated with mortality in all 3 categories. Increasing age was a significant factor, but there was no significant  
14 difference in age quintile distribution ( $\chi^2=12.168$ ,  $p=0.144$ , ns) with 89%, 84% and 86% in the oldest quintile in the  
15 CHD, NCHD and DIC groups respectively. For deprivation, for CHD and NCHD the pattern mirrored that of hospital  
16 admission with significantly increased mortality rates in the lesser deprived quintiles but not in the highest quintile  
17 whereas in DIC, a significant effect showing an increased mortality rate was only seen in the most deprived  
18 quintile. All categories shared a propensity for greater prior emergency admissions, multi morbidity and being in a  
19 palliative phase of care whilst being nursing home residency was associated with death in the community rather  
20 than hospital death. Individual morbidities varied in their associations, noting that diabetes and chronic kidney  
21 disease were in increased association with mortality only in the CHD group. The Black ethnic minority had  
22 significantly higher, and the South Asian significantly lower COVID hospital mortality rate, proportionately mirroring  
23 admission rates. Directly comparing CHD to NCHD confirmed a significantly increased association with Black  
24 ethnicity (OR 4.6 (2 - 10.2),  $p<0.003$ ), diabetes (OR 1.5 (1 - 2.3),  $p<0.005$ ) and chronic kidney disease (OR 1.6 (1.1 -  
25 2.3),  $p<0.004$ ) and an even greater negative association with current of previous smoking (OR 0.1 (0 - 0.3),  $p<0.002$ ).  
26  
27  
28  
29  
30  
31  
32  
33  
34  
35  
36  
37

### 38 **Absolute risk of COVID Death by Ethnic group**

39  
40  
41 Specifically for COVID death, Table 2 shows numbers, percentages, absolute risk and excess risk with unadjusted ORs  
42 for the ethnic minorities compared to the White group and Figure 2a shows the distribution of mortality outcome by  
43 ethnic category ( $\chi^2 = 126.1$ ,  $p<0.001$ ). The absolute risk of COVID death was 1.32, 0.73 and 2.2 per 1000 population  
44 in the White, South Asian and Black ethnic groups and the excess risk was -0.61 (negative) and 0.85 deaths per 1000  
45 population in South Asians and Blacks versus Whites respectively. Compared to the White population, the  
46 unadjusted OR (95% CI) for COVID death for the Black and Asian groups was 1.6 (1.2 – 2.3) and 0.5 (0.4 – 0.8)  
47 respectively (both  $p<0.01$ ). The ethnic groups differed significantly in age (White  $50\pm 20$ , South Asian  $45\pm 16$ , Black  
48  $45\pm 17$  years,  $F=1868.9$ ,  $P<0.001$ ) and age was the dominant factor associated with hospital admission and death  
49 (Tables 1, 3, 4, 5). To avoid any potential misrepresentation of mortality outcomes by statistical age adjustment, the  
50 absolute effects were considered for the oldest quintile only where 84% of all COVID deaths occurred, in which case  
51 the ORs were Black 3.9 (2.7 – 5.6) ( $p<0.001$ ) and South Asian 0.9 (0.6 – 1.4) ( $p=0.72$ , ns) (Figure 2b).  
52  
53  
54  
55  
56  
57  
58  
59  
60

### **COVID Hospital admission and COVID mortality**

1 By introducing hospital admission status, the COVID mortality ORs were Black 1.3 (0.9 – 2.0) (p=0.206, ns) and South  
2 Asian 1.5 (0.9 – 2.3) (p=0.098, ns) were similar, indicating similar in hospital mortality in contrast to the whole  
3 population effect. To negate this potential effect of prior propensity for acquisition of serious COVID infection, and  
4 focusing on the Black and South Asian minorities compared to the White majority, a narrower assessment of those  
5 who were admitted with COVID and had a COVID death was made. Amongst 930 COVID admissions, excluding those  
6 with a COVID admission but with non-COVID death (n = 83 (9%), COVID death occurred 270 (32%) (White 189, South  
7 Asian 32, Black 38, Other 11). The ORs for the association of ethnicity with COVID mortality were Black 1.2 (0.7 – 1.8)  
8 (p=0.423, ns) and South Asian 1.6 (1.0 – 2.5) (p= 0.075, ns) ( $\chi^2= 5.92$ , p= 0.115, ns) (Figure 2c). Utilising the full  
9 model with all independent variables, including age, which remained significantly different between ethnic groups  
10 (F= 13.23, p<0.001), then the significantly associated variables were age, gender, smoking status, body mass index,  
11 palliative phase of life, multi-morbidity and the individual comorbidities of cardiac failure, chronic kidney disease and  
12 peripheral vascular disease but not ethnic grouping or deprivation score (Table 6). Finally, Table 2 shows the  
13 absolute risks of COVID death in COVID hospital admission and unadjusted ORs which are consistent with the  
14 findings of the modelled data.  
15  
16  
17  
18  
19  
20  
21  
22  
23  
24  
25  
26  
27  
28

## 29 Discussion

### 30 Principal findings:

31 Over and above known general associations with hospital admission and mortality, our study suggest a complex  
32 association of deprivation and points to heterogeneity of the impact of ethnicity, both of which may vary by locality.  
33 We highlight the need for local health economies to have robust, accurate and integrated clinical data in order to  
34 assess and inform local decisions making and , in particular, at a time of heightened anxiety, we raises a concern  
35 about the conveyance of risk to local communities. The crucial differences in relationship to other studies are as  
36 follows:  
37  
38  
39  
40  
41  
42  
43  
44

### 45 General Associations

46 Uncontroversially, factors associated with non-COVID or COVID hospital admission and death included age, gender,  
47 prior emergency admissions, and palliative phase of life, nursing home residence and multi-morbidity with specific  
48 comorbidities associated with COVID admission or death and with ethnic status. Any association of smoking with  
49 better COVID outcomes, observed in other studies,<sup>2,17</sup> may be refuted when taken in the context of this being  
50 common to non-COVID admissions and death during this period.  
51  
52  
53  
54  
55  
56

### 57 COVID vs Non COVID Admissions

58 The significant differences were age, gender and degree of comorbidity complexity (palliative care, nursing home)  
59 but as it is likely that patterns of emergency admissions differed at this time, comparisons of COVID to non-COVID  
60

1 hospital admission may have little relevance to COVID outcomes, noteworthy for studies that have reported on  
2 COVID hospital admission alone.<sup>12,13,18</sup>  
3  
4

## 6 Deprivation

7 For hospital non-COVID and COVID admission and death, the pattern was for excess in lesser deprived quintiles in  
8 the White ethnic population but not within ethnic minority groups where deprivation was not a significant factor.  
9 This contrasts with other studies: <sup>2,5</sup> in some deprivation was not a significantly associated factor in fully adjusted  
10 models,<sup>19</sup> whilst other UK studies, <sup>18</sup> and most overseas studies, have not considered this.<sup>12,13</sup> Following the  
11 H1N1 pandemic influenza of 2009, many studies indicated effects of deprivation including a rural urban divide  
12 impact,<sup>20</sup> as is seen in this pandemic.<sup>21</sup> Our findings within a health economy with significant deprivation call for the  
13 need to explore this association within larger studies specifically within urban areas.  
14  
15  
16  
17  
18  
19

## 20 Ethnicity

21  
22  
23 We note that a recent meta-analysis shows heterogeneity in the association of ethnicity to COVID mortality;<sup>22</sup> in a  
24 large population study reporting adverse odds ratios for all ethnic groups, their crude unadjusted data showed  
25 significantly increased risk in the Black ( $\chi^2 = 17.464$ ,  $p < 0.001$ ) but not in the South Asian group ( $\chi^2 = 3.238$ ,  $p = 0.072$ ),<sup>2</sup>  
26 as shown in another population level study;<sup>21</sup> in the largest reported hospital admission series both ethnic groups  
27 had significantly lower unadjusted mortality rates,<sup>15</sup> whilst in their modelled data no effect was seen amongst  
28 Blacks; from New York there was no adverse ethnicity signal,<sup>12,13</sup> and early reported adverse ethnicity outcomes in  
29 the 2009 UK flu pandemic,<sup>23</sup> did not stand subsequent review.<sup>24</sup> We find our Black population had significantly  
30 higher and the South Asian lower crude and adjusted COVID admission rates compared to Whites, also observing  
31 that both ethnic subgroups had lower non-COVID hospital admissions, further contextualising the strong effect in the  
32 Black cohort. In both groups, their crude and adjusted patterns of COVID mortality mirrored that of COVID hospital  
33 admission but from the numerical base of COVID admission, there was no significant difference between the Black  
34 and South Asian compared to the White groups, highlighting pitfalls of examining effects in isolation. Our data in the  
35 Black population is broadly in keeping with some studies showing excess COVID hospitalisation and mortality but the  
36 South Asian group's lower absolute and adjusted rate of admission and death from COVID 19 are strikingly  
37 different. Given the variation in findings to date, we do not consider this an "unexpected finding", and hypothesise  
38 that many local population factors are at play including population density, family size, housing, duration of  
39 immigration, country of birth (including UK born) and occupation and the precise ethnic group within the 'South  
40 Asian' population may well be of importance. A recent updated analysis by the UK Office for National Statistics has  
41 emphasised that "*ethnic differences in mortality involving COVID-19 are most strongly associated with demographic  
42 and socio-economic factors, such as place of residence and occupational exposures, and cannot be explained by pre-  
43 existing health conditions*" which conclusion is consistent with our locally-dictated findings.<sup>25</sup> Otherwise within  
44 BAME groups we find specific individual comorbidities vary in their association with COVID risks: in South Asians  
45 these are diabetes, peripheral vascular disease and atrial fibrillation; in the Black population hypertension, atrial  
46  
47  
48  
49  
50  
51  
52  
53  
54  
55  
56  
57  
58  
59  
60

1 fibrillation and cardiac failure; in white ethnicity most co-morbidities but in particular COPD, chronic kidney disease  
2 and rheumatoid arthritis.  
3  
4

### 6 **The conveyance of risk**

8 Public health messages are vital to convey but population adjusted risk rates may confuse, adversely impacting  
9 behaviors such that, it is feared, hospital admission patterns may change unfavourably. Absolute, absolute excess,  
10 relative, unadjusted and adjusted risk is complex to communicate even for healthcare professionals making them  
11 susceptible to reasoning errors and misinterpretation of probabilities<sup>26</sup> and individuals, with erstwhile health risk,  
12 should know about the magnitude of risk in a way that can be conceptualised.<sup>27,28</sup> For our Black population, the fully-  
13 modelled OR for COVID mortality was 2.1, the absolute risk 2.2 / 1000 people or an excess risk of 0.9/1000. A Black  
14 person in Wolverhampton ought to be informed that “twice as likely to die of COVID” compared to the White  
15 community can also mean “a 1 in 1000 excess risk”.  
16  
17  
18  
19  
20  
21  
22

### 23 **Strengths and Weaknesses.**

24  
25  
26 Combining Wolverhampton’s health data evaluated our local population’s heterogeneous demographic and its  
27 associations with community or hospital non-COVID and COVID hospital admission and mortality, uniquely  
28 approaching these outcomes simultaneously. This local nuance complements larger studies, informing appraisal of  
29 risk from an urban, and multi-ethnic and deprived setting, highlighting concerns of extrapolation from larger  
30 datasets to UK localities. An example of a particular strength of the data quality was the cross check ascertainment  
31 of COVID admission, without sole reliance on COVID testing, permitting specific categorisation of deaths (COVID,  
32 non-COVID and post discharge) rather than less accurately into global mortality.  
33  
34  
35  
36  
37  
38

39 Limitations of the study: This is a twelve-week evaluation spanning the pandemic’s upsurge and peak; the population  
40 and event number were comparatively small; cause of death in the community was unknown and it is likely that  
41 people died away from the hospital undiagnosed with COVID 19 ; some data were missing but this was mitigated;  
42 whilst being aligned to the population at 99.5% concordance, hospital data were not totally drawn from the City  
43 population, which varied by GP registration, residency, or admission from immediately surrounding areas and a  
44 small proportion of admissions were non-resident or non-registered, so this is not strictly an epidemiological study  
45 but an observational study comparing defined cohorts in tiers of analysis (e.g. COVID death amongst COVID  
46 admissions) where this caveat does not apply.<sup>16</sup>  
47  
48  
49  
50  
51  
52

### 53 **Implications for clinicians and policy makers**

54  
55  
56 We show that a variety of recognised factors were associated with COVID death, as with non-COVID death. At our  
57 local level, COVID admission and death were not strongly associated with worsening deprivation, with a novel  
58 potential different relationship in the White population.  
59  
60



1 Higher absolute and adjusted COVID admission and mortality occurred in the Black population whilst they were  
2 reduced in Wolverhampton's South Asian community. We point out the non-significant association between in-  
3 hospital COVID-19 case fatality and ethnicity, raising the probability that COVID-19 mortality relates to differential  
4 risks of exposure, susceptibility and disease contraction before hospital admission, let alone the possible avoidance  
5 of hospital admission. Two important considerations are the potential excessive use of multiple factors and the  
6 disruption of the perspective from a population's base through hospital admissions to COVID specific admission,  
7 leading to widely varying conclusions, highlighting the difficulties of using observational data and the potential for  
8 Collider bias.<sup>29</sup> We support the case for more localised population-based studies of both hospital admission and  
9 subsequent death, such as ours, in which the denominator and numerator populations can be clearly linked and are  
10 fully and transparently ascertained and characterised. To avoid associations in the data being due to the way in  
11 which data are sampled, local health economies should be mandated to link hospital and primary care data across  
12 their population level down to the un-anonymised individual level; they should, in preparation for future epidemics,  
13 have data quality mechanisms in place to ensure accuracy in their demographics, the accrual of important missing  
14 data and the triangulation of key outcomes to minimise false positive and negative results. This includes the need to  
15 have a robust, systematic, accurate and timely approach to the recording of death whether in the community or  
16 hospital setting. A defined data set and its capture in routine clinical systems seems apposite.<sup>30</sup> Accepting that  
17 variation in findings in different population subsets is both inevitable and valid, we would suggest the need for the  
18 public health and research community to accommodate uncertainty in emergent evidence, learning from the  
19 experience of previous viral pandemics. This includes the need to have a robust, systematic, accurate and timely  
20 approach to the recording of death whether in the community or hospital setting.<sup>31</sup>

### 36 **Future research**

37 Perhaps most crucially we argue that, in reporting future research of this kind during the current pandemic and  
38 beyond, there is an ethical obligation for the standardisation of the conveyance of risk in a manner that spans the  
39 absolute to the relative so that is easily comprehensible to the individuals and populations at risk and others,  
40 including health professionals, politicians and the media, all matters in which the editorial and peer review  
41 mechanism of our medical journals have a vital role.

42 **Author contributions:** Accountable senior author BMS; Data analysis, manuscript writing: BMS, JB, SJD, AV;  
43 Preparation for submission: SJD, BMS, JB; Database quality, data integration and data quality and integration: AV,  
44 BMS, VK; Reading drafts as lay expert: SM; Statistical advice: AN; All authors contributed intellectual content during  
45 the drafting and revision of the work and approved the final version.

46 **Transparency declaration:** BMS affirms that the manuscript is an honest, accurate, and transparent account of the  
47 study being reported; that no important aspects of the study have been omitted; and that any discrepancies from  
48 the study as planned (and, if relevant, registered) have been explained

1 **Funding:** None  
2  
3

4 **Competing interest statement** All authors have completed the Unified Competing Interest form (available on  
5 request from the corresponding author) and declare: no support from any organisation for the submitted work; no  
6 financial relationships with any organisations that might have an interest in the submitted work in the previous three  
7 years, no other relationships or activities that could appear to have influenced the submitted work.  
8  
9

10  
11  
12 **Data Sharing:** Anonymised data will be shared on reasonable request to the corresponding author  
13  
14  
15  
16  
17  
18  
19  
20  
21  
22  
23  
24  
25  
26  
27  
28  
29  
30  
31  
32  
33  
34  
35  
36  
37  
38  
39  
40  
41  
42  
43  
44  
45  
46  
47  
48  
49  
50  
51  
52  
53  
54  
55  
56  
57  
58  
59  
60

For peer review only



## References

1. Xu B, Kraemer MUG; Open COVID-19 Data Curation Group. Open access epidemiological data from the COVID-19 outbreak. *Lancet Infect Dis*. 2020 May;20(5):534. doi: 10.1016/S1473-3099(20)30119-5
2. Williamson EJ, Walker AJ, Bhaskaran K, et al. OpenSAFELY: factors associated with COVID-19 death in 17 million patients [published online ahead of print, 2020 Jul 8]. *Nature*. 2020;10.1038/s41586-020-2521-4. doi:10.1038/s41586-020-2521-4
3. Mehra MR, Ruschitzka F, Patel AN. Retraction-Hydroxychloroquine or chloroquine with or without a macrolide for treatment of COVID-19: a multinational registry analysis [retraction of: *Lancet*. 2020 May 22;:]. *Lancet*. 2020;395(10240):1820. doi:10.1016/S0140-6736(20)31324-6
4. Rubin EJ, Baden LR, Morrissey S, Campion EW. Medical Journals and the 2019-nCoV Outbreak. *N Engl J Med*. 2020;382(9):866. doi:10.1056/NEJMe2001329
5. Public Health England. Disparities in the risk and outcomes of COVID-19. [https://assets.publishing.service.gov.uk/government/uploads/system/uploads/attachment\\_data/file/892085/disparities\\_review.pdf](https://assets.publishing.service.gov.uk/government/uploads/system/uploads/attachment_data/file/892085/disparities_review.pdf) (Accessed 20-07-20)
6. Office for National Statistics. <https://www.ons.gov.uk/peoplepopulationandcommunity/birthsdeathsandmarriages/deaths> (accessed 20-07-20)
7. Willett K on behalf of NHS England and NHS Improvement . COVID-19 Patient Notification System (CPNS) <https://www.england.nhs.uk/coronavirus/wp-content/uploads/sites/52/2020/04/C0389-update-to-cpns-reporting-letter-27-april-2020.pdf> (accessed 20-07-20)
8. Woloshin S, Patel N, Kesselheim AS. False Negative Tests for SARS-CoV-2 Infection - Challenges and Implications [published online ahead of print, 2020 Jun 5]. *N Engl J Med*. 2020;10.1056/NEJMp2015897. doi:10.1056/NEJMp2015897
9. Bradley SH, Lawrence NR, Carder P. Using primary care data for health research in England - an overview. *Future Healthc J*. 2018;5(3):207-212. doi:10.7861/futurehosp.5-3-207
10. Zhou F, Yu T, Du R, et al. Clinical course and risk factors for mortality of adult inpatients with COVID-19 in Wuhan, China: a retrospective cohort study [published correction appears in *Lancet*. 2020 Mar 28;395(10229):1038] [published correction appears in *Lancet*. 2020 Mar 28;395(10229):1038]. *Lancet*. 2020;395(10229):1054-1062. doi:10.1016/S0140-6736(20)30566-3
11. Goyal P, Choi JJ, Pinheiro LC, et al. Clinical Characteristics of COVID-19 in New York City. *N Engl J Med*. 2020;382(24):2372-2374. doi:10.1056/NEJMc2010419
12. Argenziano MG, Bruce SL, Slater CL, et al. Characterization and clinical course of 1000 patients with coronavirus disease 2019 in New York: retrospective case series. *BMJ*. 2020;369:m1996. Published 2020 May 29. doi:10.1136/bmj.m1996

13. Petrilli CM, Jones SA, Yang J, et al. Factors associated with hospital admission and critical illness among 5279 people with coronavirus disease 2019 in New York City: prospective cohort study. *BMJ*. 2020;369:m1966. Published 2020 May 22. doi:10.1136/bmj.m1966
14. Gianfrancesco M, Hyrich KL, Al-Adely S, et al. Characteristics associated with hospitalisation for COVID-19 in people with rheumatic disease: data from the COVID-19 Global Rheumatology Alliance physician-reported registry. *Ann Rheum Dis*. 2020;79(7):859-866. doi:10.1136/annrheumdis-2020-217871
15. Harrison, EM, Docherty AB, Barr B, et al. Ethnicity and Outcomes from COVID-19: The ISARIC CCP-UK Prospective Observational Cohort Study of Hospitalised Patients (5/31/2020). Available at SSRN: <https://ssrn.com/abstract=3618215> or <http://dx.doi.org/10.2139/ssrn.3618215>
16. Pearce N. Classification of epidemiological study designs. *Int J Epidemiol*. 2012;41(2):393-397. doi:10.1093/ije/dys049
17. Farsalinos K, Barbouni A, Niaura R. Systematic review of the prevalence of current smoking among hospitalized COVID-19 patients in China: could nicotine be a therapeutic option? [published online ahead of print, 2020 May 9]. *Intern Emerg Med*. 2020;1-8. doi:10.1007/s11739-020-02355-7
18. Docherty AB, Harrison EM, Green CA, et al. Features of 20 133 UK patients in hospital with COVID-19 using the ISARIC WHO Clinical Characterisation Protocol: prospective observational cohort study. *BMJ*. 2020;369:m1985. Published 2020 May 22. doi:10.1136/bmj.m1985
19. Niedzwiedz CL, O'Donnell CA, Jani BD, et al. Ethnic and socioeconomic differences in SARS-CoV-2 infection: prospective cohort study using UK Biobank. *BMC Med*. 2020;18(1):160. Published 2020 May 29. doi:10.1186/s12916-020-01640-8
20. Rutter PD, Mytton OT, Mak M, Donaldson LJ. Socio-economic disparities in mortality due to pandemic influenza in England. *Int J Public Health*. 2012;57(4):745-750. doi:10.1007/s00038-012-0337-1
21. de Lusignan S, Dorward J, Correa A, et al. Risk factors for SARS-CoV-2 among patients in the Oxford Royal College of General Practitioners Research and Surveillance Centre primary care network: a cross-sectional study [published online ahead of print, 2020 May 15]. *Lancet Infect Dis*. 2020;S1473-3099(20)30371-6. doi:10.1016/S1473-3099(20)30371-6
22. Pan D, Sze S, Minhas JS, et al. The impact of ethnicity on clinical outcomes in COVID-19: A systematic review. *EClinicalMedicine*. 2020;23:100404. Published 2020 Jun 3. doi:10.1016/j.eclinm.2020.100404
23. Nguyen-Van-Tam JS, Openshaw PJ, Hashim A, et al. Risk factors for hospitalisation and poor outcome with pandemic A/H1N1 influenza: United Kingdom first wave (May-September 2009). *Thorax*. 2010;65(7):645-651. doi:10.1136/thx.2010.135210
24. Nyland GA, McKenzie BC, Myles PR, et al. Effect of ethnicity on care pathway and outcomes in patients hospitalized with influenza A(H1N1)pdm09 in the UK. *Epidemiol Infect*. 2015;143(6):1129-1138. doi:10.1017/S0950268814001873
25. Office for National Statistics  
<https://www.ons.gov.uk/peoplepopulationandcommunity/birthsdeathsandmarriages/deaths/articles/updati>

1 [ngethniccontrastsindeathsinvolvingthecoronaviruscovid19englandandwales/deathsoccurring2marchto28july](https://www.bmj.com/lookup/doi/10.1136/bmj.m1571)  
2  
3 [2020#main-points](#) (accessed 22/10/20)

- 4  
5 26. Grant RL. Converting an odds ratio to a range of plausible relative risks for better communication of research  
6 findings [published correction appears in BMJ. 2014;348:g2124]. BMJ. 2014;348:f7450. Published 2014 Jan  
7 24. doi:10.1136/bmj.f7450  
8  
9 27. Paling J. Strategies to help patients understand risks. BMJ. 2003;327(7417):745-748.  
10 doi:10.1136/bmj.327.7417.745  
11  
12 28. Ahmed H, Naik G, Willoughby H, Edwards AG. Communicating risk. BMJ. 2012;344:e3996. Published 2012  
13 Jun 18. doi:10.1136/bmj.e3996  
14  
15 29. Griffith GJ, Morris TT, Tudball M, et al. Collider bias undermines our understanding of COVID-19 disease risk  
16 and severity. Medrxiv preprint doi.org/10.1101/2020.05.04.20090506  
17  
18 30. Cross M. Show us the data: why clinical outcomes matter. BMJ. 2012;344:e66. Published 2012 Jan 10.  
19 doi:10.1136/bmj.e66  
20  
21 31. Luce T. COVID 19: death certification in England and Wales. BMJ. 2020;369:m1571. Published 2020 Apr 21.  
22 doi:10.1136/bmj.m1571  
23  
24  
25  
26  
27  
28  
29  
30  
31  
32  
33  
34  
35  
36  
37  
38  
39  
40  
41  
42  
43  
44  
45  
46  
47  
48  
49  
50  
51  
52  
53  
54  
55  
56  
57  
58  
59  
60

a.

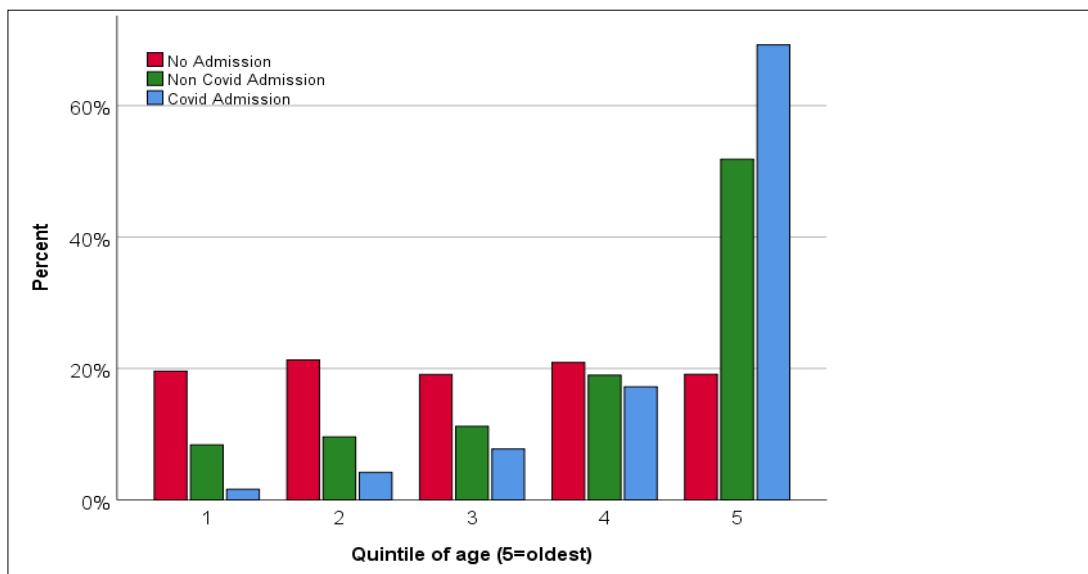

b.

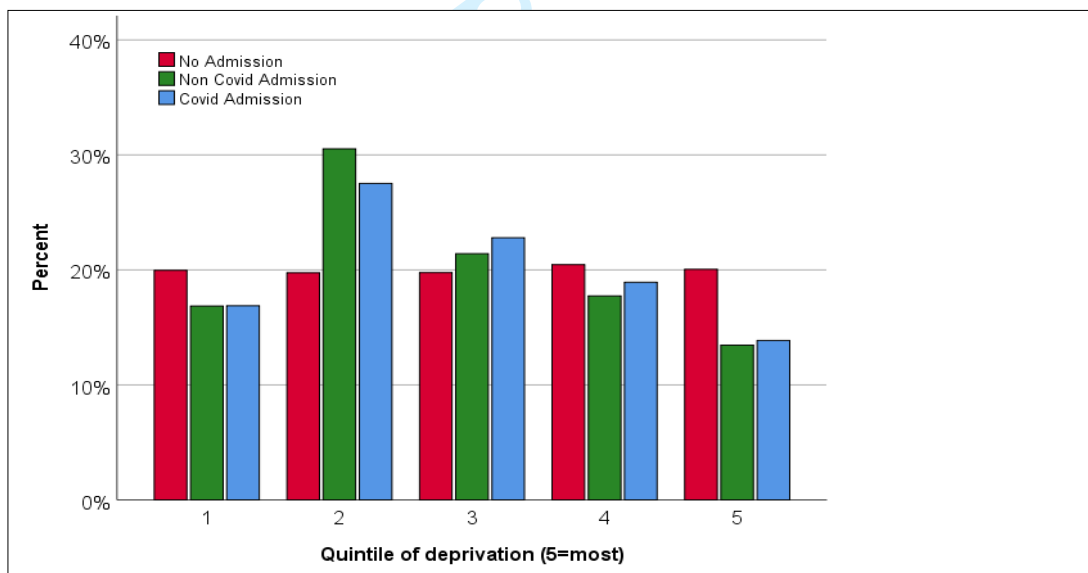

c.

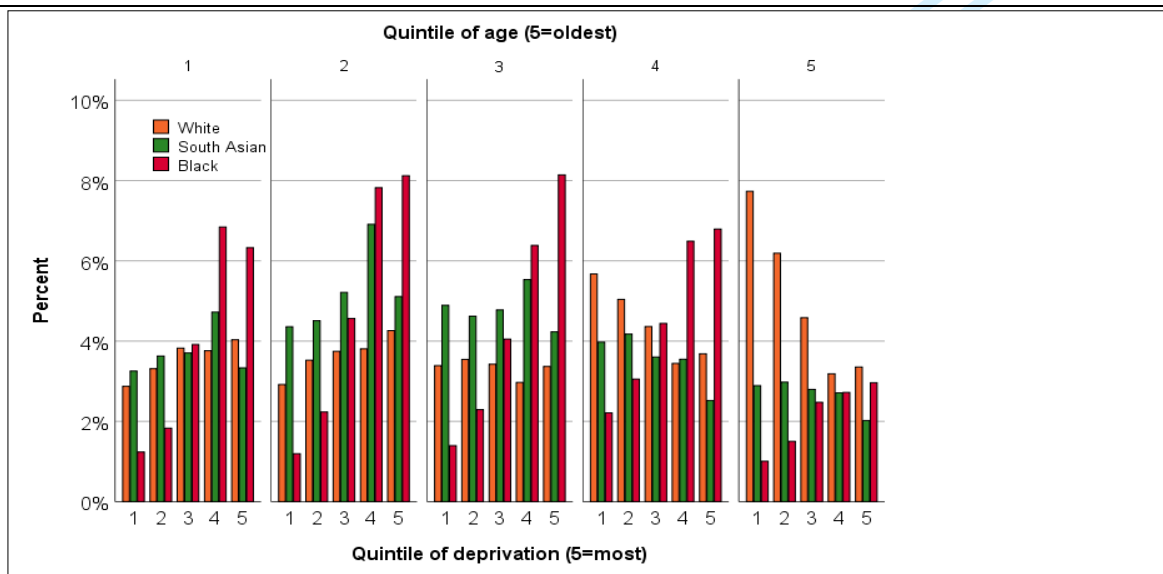

1  
2  
3  
4  
5  
6  
7  
8  
9  
10  
11  
12  
13  
14  
15  
16  
17  
18  
19  
20  
21  
22  
23  
24  
25  
26  
27  
28  
29  
30  
31  
32  
33  
34  
35  
36  
37  
38  
39  
40  
41  
42  
43  
44  
45  
46  
47  
48  
49  
50  
51  
52  
53  
54  
55  
56  
57  
58  
59  
60

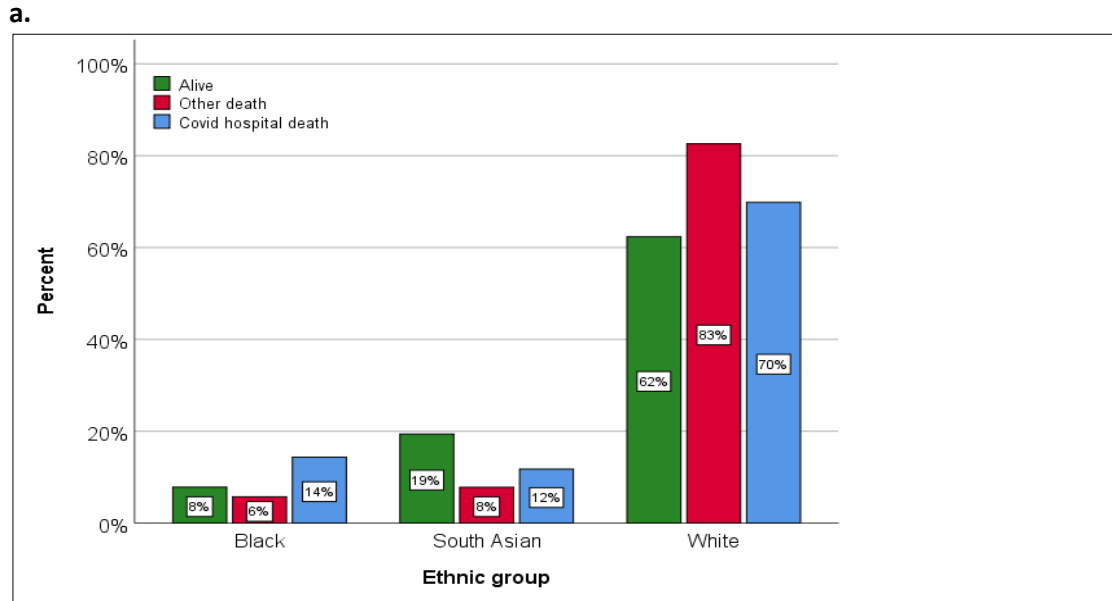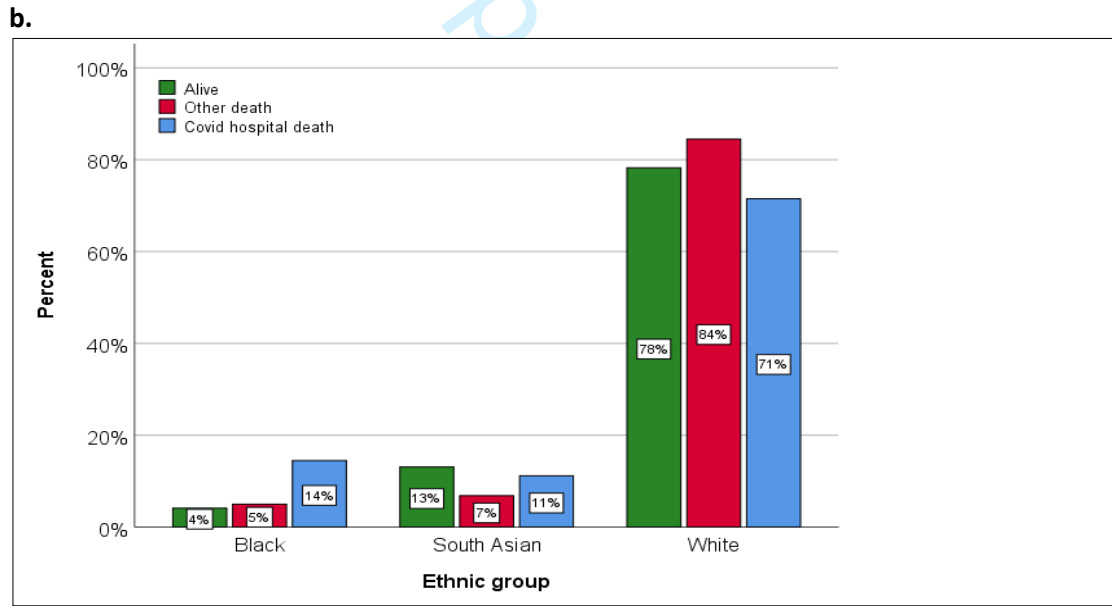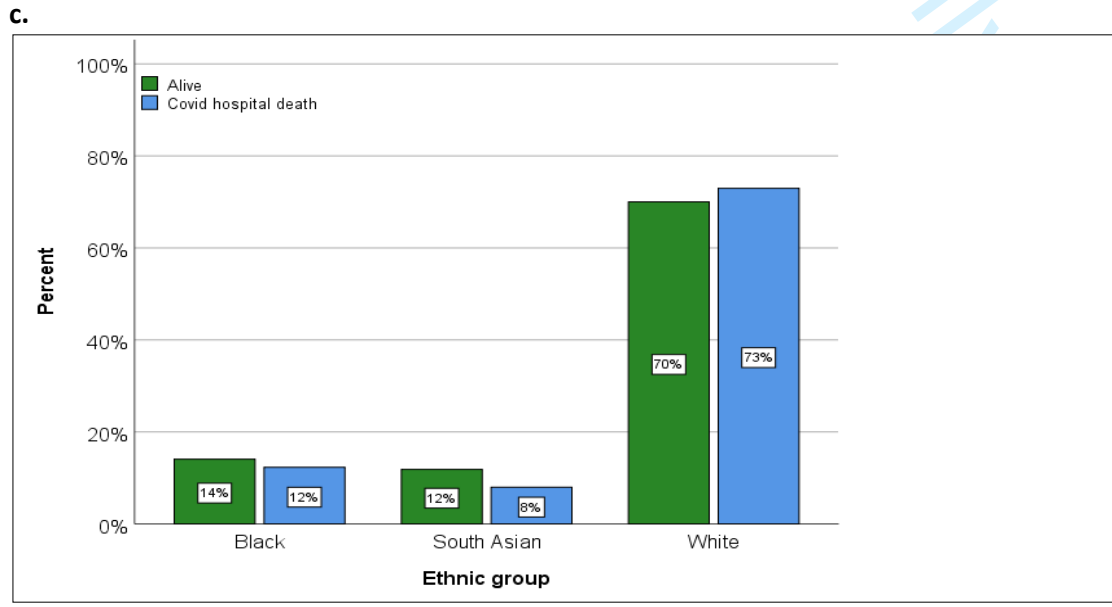

## TABLES

Table 1

The demographic, clinical features and mortality outcomes of a whole adult population (n= 228,632) categorised according to their hospital admission status during 12 weeks of the UK COVID-19 pandemic. Data are presented as the mean± SD or as percentages. Between groups analysis is by ANOVA or by Chi square for scale or categorical variables respectively. Co-morbidities are listed in descending order of frequency.

| Table 1                                | Whole population      | Not admitted    | Non COVID Admission    | COVID Admission       |         |
|----------------------------------------|-----------------------|-----------------|------------------------|-----------------------|---------|
| Number (% of total)                    | 228,632               | 223,074 (97.6%) | 4,628 (2%)             | 930 (0.4%)            |         |
| Age (years)                            | 50.0 ± 18.8           | 47.6 ± 18.5     | 63.1 ± 20.5            | 71.4 ± 16.5           | p<0.001 |
| Gender (male, %)                       | 114,866 (50.2%)       | 50.3%           | 48.4%                  | 55.2%                 | p<0.001 |
| Ethnicity (% in category)              |                       |                 |                        |                       |         |
| · White                                | 142,781 (62.5%)       | 62.1%           | 77.7%                  | 73.5%                 | p<0.001 |
| · South Asian                          | 44,229 (19.3%)        | 19.6%           | 10.4%                  | 8.9%                  |         |
| · Black                                | 17,858 (7.8)          | 7.9%            | 4.6%                   | 12.2%                 |         |
| · Mixed                                | 5,809 (2.5%)          | 2.6%            | 1.3%                   | 0.6%                  |         |
| · Chinese                              | 806 (0.4%)            | 0.4%            | 0.1%                   | 0.2%                  |         |
| · Unknown                              | 17,149 (7.5%)         | 7.5%            | 5.8%                   | 4.5%                  |         |
| Index of Multiple Deprivation          | 32.8 ± 15.9           | 32.9 ± 15.9     | 30.4 ± 14.4            | 30.7 ± 14.4           | p<0.001 |
| Smoking status (% never)               | 148,046 (64.8%)       | 65%             | 73%                    | 81%                   | p<0.001 |
| Body Mass Index (kg/m <sup>2</sup> )   | 27.3 (± 5.7)          | 27.3 (± 5.7)    | 27.8 (± 5.1)           | 27.9 (± 4.6)          | p<0.001 |
| Prior admission (Any 1 year), (≥3) (%) | 15,119 (7%) (0.6%)    | 6% (0.4%)       | 31% (7%)               | 35% (8%)              | p<0.001 |
| Any comorbidity (≥3) (%)               | 110,564 (48 %) (12 %) | 48% (11%)       | 77% (41%)              | 88% (58%)             | p<0.001 |
| Palliative care registered             | 1,530 (0.7%)          | 0.5%            | 4.9%                   | 13.9%                 | p<0.001 |
| Nursing home resident                  | 2,130 (0.9%)          | 0.8%            | 4.7%                   | 9.7%                  | p<0.001 |
| Hypertension                           | 47,830 (20.9%)        | 20.2%           | 47.6%                  | 64.2%                 | p<0.001 |
| Depression                             | 39,153 (17%)          | 17.0%           | 22.4%                  | 18.7%                 | p<0.001 |
| Asthma                                 | 30,335 (13.3%)        | 13.2%           | 16.1%                  | 16.3%                 | p<0.001 |
| Diabetes                               | 20,529 (9.0%)         | 8.6%            | 21.4%                  | 33.8%                 | p<0.001 |
| Ischaemic heart disease                | 10,965 (4.8%)         | 4.4%            | 19.9%                  | 23.2%                 | p<0.001 |
| Chronic kidney disease                 | 10,265 (4.5%)         | 4.1%            | 17.6%                  | 29.0%                 | p<0.001 |
| Cancer                                 | 9,796 (4.3%)          | 4.0%            | 16.0%                  | 17.8%                 | p<0.001 |
| Atrial fibrillation                    | 6,771 (3.0%)          | 2.6%            | 4.7%                   | 8.7%                  | p<0.001 |
| Chronic obstructive pulmonary disease  | 6,762 (3.0%)          | 2.7%            | 12.3%                  | 15.1%                 | p<0.001 |
| Cerebro-vascular disease               | 5,359 (2.3%)          | 2.2%            | 8.8%                   | 13.5%                 | p<0.001 |
| Cardiac failure                        | 4,940 (2.2%)          | 1.9%            | 13.1%                  | 20.8%                 | p<0.001 |
| Osteoarthritis                         | 4,267 (1.9%)          | 1.7%            | 8.0%                   | 11.2%                 | p<0.001 |
| Epilepsy                               | 4,035 (1.8%)          | 1.7%            | 3.8%                   | 4.5%                  | p<0.001 |
| Rheumatoid arthritis                   | 3,284 (1.4%)          | 1.4%            | 4.2%                   | 6.2%                  | p<0.001 |
| Mental health disorder                 | 2,967 (1.3%)          | 1.3%            | 1.7%                   | 1.7%                  | p<0.05  |
| Peripheral vascular disease            | 2,724 (1.2%)          | 1.1%            | 4.7%                   | 8.7%                  | p<0.001 |
| Dementia                               | 2,304 (1.0%)          | 0.9%            | 4.0%                   | 7.8%                  | p<0.001 |
| Learning difficulties                  | 1,597 (0.7%)          | 0.7%            | 1.0%                   | 1.2%                  | p<0.05  |
| Vital status (n, % died)               | 1,093 (0.5%)          | 407, 0.2%       | 333, 7.2% <sup>§</sup> | 353, 38% <sup>+</sup> | p<0.001 |

1 ‡, 237 non-COVID hospital deaths, 94 post discharge deaths in community, 2 hospital COVID deaths

2 †, 270 hospital COVID deaths, 47 non-COVID hospital deaths, 36 post discharge deaths in community

3  
4  
5  
6 **Table 2**

7  
8 COVID admission and death by ethnic category showing numbers, absolute rates per 1000 population, and the excess risk and  
9 unadjusted OR s (95% CI) vs the White group as comparator.

| Table 2                              | White         | South Asian                     | Black                             | Other or Unknown                |
|--------------------------------------|---------------|---------------------------------|-----------------------------------|---------------------------------|
| Total numbers                        | 142,781 (63%) | 44, 229 (19%)                   | 17,858 (8%)                       | 23,764 (10%)                    |
| COVID admission                      | 684 (74%)     | 83 (9%)                         | 113 (12%)                         | 50 (5%)                         |
| COVID admission/ 1000                | 4.8           | 1.9                             | 6.3                               | 2.1                             |
| COVID admission excess risk / 1000   | comparator    | -2.9                            | 1.5                               | -2.7                            |
| COVID admission OR                   | comparator    | 0.39 (0.31 - 0.48), p<0.001     | 1.31 (1.07 - 1.59), p<0.001       | 0.43 (0.33 - 0.58), p<0.001     |
| COVID death                          | 190 (70%)     | 32 (12%)                        | 39 (14%)                          | 11 (4%)                         |
| COVID death/ 1000                    | 1.3           | 0.7                             | 2.2                               | 0.5                             |
| COVID death excess risk / 1000       | comparator    | -0.6                            | 0.9                               | -0.9                            |
| COVID death OR                       | comparator    | 0.54 (0.37 - 0.79), p<0.01      | 1.64 (1.16 - 2.31), p<0.01        | 0.35 (0.19 - 0.64), p<0.01      |
| COVID death / COVID admission / 1000 | 0.3           | 0.4                             | 0.3                               | 0.2                             |
| COVID death in COVID admission OR    | comparator    | 1.55 (0.96 - 2.51), p=0.075, ns | 1.19 (0.78 - 1.83), p = 0.423, ns | 0.63 (0.32 - 1.25), p=0.187, ns |

**Table 3**

Multinomial regression for the association of factors with COVID or Non COVID related emergency hospital admissions (HA) compared to the reference category of those not admitted (n=223, 074). Data are the Odds Ratio (OR) with 95% confidence intervals. For age and IMD as categorical ordinal variables (data ranges shown), the comparators were the youngest and least deprived quintiles respectively. Comorbidities associations are listed in descending OR order for the CA group. The comparison of CA vs NCA was by binary logistic regression. Variables not listed (Table 1) were excluded stepwise as not significant.

| Table 3                               | COVID HA                   | Non COVID HA             | CHA vs NCHA              |
|---------------------------------------|----------------------------|--------------------------|--------------------------|
| Number (%of population)               | 930 (0.4%)                 | 4,628 (2%)               |                          |
| Gender (male)                         | 1.5 (1.3 - 1.7), p<0.001   | ns, p=0.48               | 1.3 (1.1 - 1.5), p<0.001 |
| Age category Q2 (30 -40)              | 2.7 (1.5 - 5), p<0.01      | 1.2 (1 - 1.3), p<0.05    | 2.2 (1.2 - 4), p<0.05    |
| Age category Q3 (41 - 51)             | 5.1 (2.9 - 9), p<0.001     | 1.4 (1.2 - 1.6), p<0.001 | 3.2 (1.8 - 5.8), p<0.001 |
| Age category Q4 (52 - 65)             | 7.8 (4.6 - 13.4), p<0.001  | 1.7 (1.5 - 1.9), p<0.001 | 3.7 (2.1 - 6.5), p<0.001 |
| Age category Q5 (66 - 113)            | 16.6 (9.7 - 28.3), p<0.001 | 2.9 (2.5 - 3.3), p<0.001 | 4.7 (2.7 - 8.1), p<0.001 |
| IMD category Q2 (16.5 - 27.7)         | 1.8 (1.4 - 2.2), p<0.001   | 2 (1.8 - 2.2), p<0.001   | ns                       |
| IMD category Q3 (27.8 - 39.0)         | 1.7 (1.4 - 2.1), p<0.001   | 1.5 (1.4 - 1.7), p<0.001 | ns                       |
| IMD category Q4 (39.3 - 45.7)         | 1.6 (1.3 - 2), p<0.001     | 1.4 (1.3 - 1.6), p<0.001 | ns                       |
| IMD category Q5 (45.7 - 71.8)         | ns, p=0.517                | ns, p=0.574              | ns                       |
| Ethnicity South Asian                 | 0.4 (0.3 - 0.5), p<0.001   | 0.5 (0.4 - 0.5), p<0.001 | 1 (0.7 - 1.2), ns, 0.735 |
| Ethnicity Black                       | 1.7 (1.3 - 2.1), p<0.001   | 0.6 (0.5 - 0.7), p<0.001 | 3.1 (2.4 - 4), p<0.001   |
| Smoking Current or Ex                 | 0.3 (0.2 - 0.3), p<0.001   | 0.5 (0.4 - 0.5), p<0.001 | 0.7 (0.5 - 0.8), p<0.001 |
| Prior emergency admissions (1 year)   | 1.6 (1.5 - 1.7), p<0.001   | 1.8 (1.7 - 1.8), p<0.001 | 0.9 (0.9 - 1), p<0.05    |
| Palliative care registered            | 4.1 (3.2 - 5.1), p<0.001   | 1.7 (1.4 - 2), p<0.001   | 2.4 (1.9 - 3.1), p<0.001 |
| Nursing home resident                 | 1.7 (1.3 - 2.3), p<0.001   | 1.2 (1 - 1.5), ns, 0.058 | 1.7 (1.3 - 2.2), p<0.001 |
| Co-morbidities ≥3                     | 1.5 (1.2 - 1.9), p<0.01    | 1.4 (1.3 - 1.6), p<0.001 | ns                       |
| Chronic obstructive pulmonary disease | 1.9 (1.5 - 2.3), p<0.001   | 1.8 (1.6 - 2), p<0.001   | ns                       |
| Peripheral vascular disease           | 1.8 (1.4 - 2.3), p<0.001   | 1.2 (1 - 1.4), p<0.05    | 1.5 (1.1 - 2), p<0.01    |
| Atrial fibrillation                   | 1.7 (1.4 - 2.1), p<0.001   | 1.4 (1.2 - 1.5), p<0.001 | 1.3 (1.1 - 1.6), p<0.01  |
| Diabetes                              | 1.6 (1.4 - 1.9), p<0.001   | 1.3 (1.2 - 1.4), p<0.001 | 1.4 (1.2 - 1.6), p<0.001 |
| Cardiac failure                       | 1.6 (1.3 - 1.9), p<0.001   | 1.4 (1.2 - 1.6), p<0.001 | ns                       |
| Rheumatoid arthritis                  | 1.5 (1.1 - 2), p<0.01      | ns, p=0.134              | ns                       |
| Epilepsy                              | 1.4 (1 - 2), p<0.05        | 1.4 (1.2 - 1.6), p<0.001 | ns                       |
| Chronic kidney disease                | 1.3 (1.1 - 1.6), p<0.01    | 1.2 (1 - 1.3), p<0.01    | ns                       |
| Hypertension                          | 1.2 (1 - 1.5), p<0.05      | ns, p=0.196              | 1.2 (1 - 1.4), p<0.05    |
| Cancer                                | 1.2 (1 - 1.5), p<0.05      | 1.6 (1.5 - 1.8), p<0.001 | 0.8 (0.7 - 1), p<0.05    |
| Cerebro-vascular disease              | ns, p=0.101                | 1.2 (1 - 1.3), p<0.05    | ns                       |
| Ischaemic heart disease               | ns, p=0.859                | 1.5 (1.3 - 1.6), p<0.001 | 0.7 (0.6 - 0.9), p<0.01  |
| Depression                            | ns, p=0.34                 | 1.1 (1 - 1.2), p<0.01    | ns                       |
| Dementia                              | ns, p=0.059                | 0.8 (0.7 - 1), p<0.05    | ns                       |



1  
2  
3  
4  
5  
6  
7  
8  
9  
10  
11  
12  
13  
14  
15  
16  
17  
18  
19  
20  
21  
22  
23  
24  
25  
26  
27  
28  
29  
30  
31  
32  
33  
34  
35  
36  
37  
38  
39  
40  
41  
42  
43  
44  
45  
46  
47  
48  
49  
50  
51  
52  
53  
54  
55  
56  
57  
58  
59  
60

For peer review only

**Table 4**

Outcomes by individual ethnic category for those specifically with COVID hospital admissions compared those not admitted within individual ethnic grouping as examined in binary regression analysis. Values are the Odds Ratio with 95%CI.

| <b>Table 4</b>                        | <b>Black</b>                   | <b>South Asian</b>              | <b>White</b>                |
|---------------------------------------|--------------------------------|---------------------------------|-----------------------------|
| Numbers admitted / not admitted       | 113 (0.6%) / 17,530            | 83 (0.2%) / 43,663              | 684 (0.5%) / 138,500        |
| Gender (male)                         | ns                             | 2 (1.2 - 3.2), p<0.01           | 1.6 (1.4 - 1.9), p<0.001    |
| Age category Q2 (30 -40)              | 2.3 (0.6 - 8.6), ns, p = 0.225 | 1.8 (0.5 - 6.8), ns, p = 0.417  | 3 (1.3 - 6.8), p<0.01       |
| Age category Q3 (41 - 51)             | 3.1 (0.9 - 11), ns, p = 0.083  | 2.6 (0.7 - 9.3), ns, p = 0.148  | 4.9 (2.2 - 10.5), p<0.001   |
| Age category Q4 (52 - 65)             | 3.8 (1.1 - 13.4), p<0.05       | 3.1 (0.9 - 10.8), ns, p = 0.082 | 9.7 (4.7 - 20), p<0.001     |
| Age category Q5 (66 - 113)            | 10 (2.8 - 36), p<0.001         | 4.5 (1.3 - 16), p<0.05          | 21.2 (10.4 - 43.3), p<0.001 |
| IMD category Q2 (16.5 - 27.7)         | ns                             | ns                              | 1.7 (1.4 - 2.1), p<0.001    |
| IMD category Q3 (27.8 - 39.0)         | ns                             | ns                              | 1.6 (1.3 - 2.1), p<0.001    |
| IMD category Q4 (39.3 - 45.7)         | ns                             | ns                              | 1.5 (1.2 - 2), p<0.01       |
| IMD category Q5 (45.7 - 71.8)         | ns                             | ns                              | ns,                         |
| Smoking Current or Ex                 | 0.3 (0.2 - 0.6), p<0.001       | 0.2 (0.1 - 0.6), p<0.01         | 0.3 (0.2 - 0.3), p<0.001    |
| Prior emergency admissions (1 year)   | ns                             | 1.5 (1.2 - 1.8), p<0.001        | 1.5 (1.4 - 1.6), p<0.001    |
| Palliative care registered            | 3.8 (1.8 - 8), p<0.001         | 11 (5.5 - 21.7), p<0.001        | 3.8 (2.9 - 5), p<0.001      |
| Nursing home resident                 | ns                             | 4.5 (1.4 - 14.2), p<0.05        | 1.6 (1.1 - 2.2), p<0.01     |
| Co-morbidities ≥3                     | 2.6 (1.5 - 4.4), p<0.001       | ns                              | 1.7 (1.3 - 2.1), p<0.001    |
| Atrial fibrillation                   | 2 (1 - 3.7), p<0.05            | 2.8 (1.4 - 5.6), p<0.01         | 1.6 (1.3 - 2), p<0.001      |
| Cardiac failure                       | 2.2 (1.2 - 3.9), p<0.05        | ns                              | 1.7 (1.3 - 2.1), p<0.001    |
| Chronic kidney disease                | ns                             | ns                              | 1.4 (1.1 - 1.7), p<0.01     |
| Chronic obstructive pulmonary disease | ns                             | ns                              | 1.9 (1.5 - 2.3), p<0.001    |
| Diabetes                              | ns                             | 4.4 (2.6 - 7.5), p<0.001        | 1.5 (1.3 - 1.9), p<0.001    |
| Hypertension                          | 2.2 (1.2 - 4.1), p<0.01        | ns                              | ns                          |
| Peripheral vascular disease           | ns                             | 3.7 (1.6 - 8.8), p<0.01         | 1.9 (1.4 - 2.5), p<0.001    |
| Rheumatoid arthritis                  | ns                             | ns                              | 1.6 (1.1 - 2.1), p<0.01     |

**Table 5**

Multinomial regression of mortality outcomes over the 12 weeks period for those that died (n= 1093) either in the community (n= 537) or Non COVID (n = 284) and COVID related (n= 272) hospital deaths (HD) (See Table 1) compared to those who were alive (n = 227, 539). Results are the Odds ratio with 95% confidence intervals. For age and IMD categories the comparators were the youngest and least deprived quintile respectively. Variables not listed from Table 1 were excluded stepwise (backwards) as not significant.

| Table 5                               | COVID HD                     | Non COVID HD             | Community Death            |
|---------------------------------------|------------------------------|--------------------------|----------------------------|
| Gender (male)                         | 2 (1.5 - 2.6), p<0.001       | 1.5 (1.2 - 1.9), p<0.01  | 1.7 (1.4 - 2.1), p<0.001   |
| Age category Q2 (30 -40)              | ns, p= 0.997                 | >100, p<0.001            | ns, p= 0.85                |
| Age category Q3 (41 - 51)             | 2.5 (0.5 - 14), ns, p= 0.283 | >100, p<0.001            | 6.6 (1.9 - 22.6), p<0.01   |
| Age category Q4 (52 - 65)             | 10.5 (2.4 - 44.8), p<0.01    | >100, p<0.001            | 13.9 (4.3 - 44.9), p<0.001 |
| Age category Q5 (66 - 113)            | 39.9 (9.6 - 165.5), p<0.001  | >100, p<0.001            | 41.3 (13 - 130.9), p<0.001 |
| IMD category Q2 (16.5 - 27.7)         | ns, p= 0.163                 | 1.8 (1.2 - 2.6), p<0.01  | ns, p= 0.708               |
| IMD category Q3 (27.8 - 39.0)         | 1.5 (1 - 2.2), p<0.05        | 2.2 (1.5 - 3.1), p<0.001 | ns, p= 0.054               |
| IMD category Q4 (39.3 - 45.7)         | ns, p= 0.319                 | 1.8 (1.2 - 2.7), p<0.01  | ns, p= 0.384               |
| IMD category Q5 (45.7 - 71.8)         | ns, p= 0.713                 | ns, p= 0.455             | 1.6 (1.2 - 2.1), p<0.01    |
| Ethnicity South Asian                 | 0.5 (0.3 - 0.8), p<0.01      | 0.4 (0.3 - 0.6), p<0.001 | 0.5 (0.3 - 0.7), p<0.001   |
| Ethnicity Black                       | 2.1 (1.5 - 3.2), p<0.001     | 0.5 (0.3 - 1), p<0.05    | ns, p= 0.841               |
| Smoking Current or Ex                 | 0 (0 - 0), p<0.001           | 0.1 (0.1 - 0.2), p<0.001 | 0.1 (0.1 - 0.1), p<0.001   |
| Body Mass Index                       | 1 (0.9 - 1), p<0.01          | 1 (1 - 1), ns, p= 0.12   | 1 (1 - 1), p<0.05          |
| Prior emergency admissions (1year)    | 1.2 (1.1 - 1.3), p<0.001     | 1.3 (1.2 - 1.4), p<0.001 | 1.3 (1.2 - 1.4), p<0.001   |
| Palliative care registered            | 9.5 (6.8 - 13.2), p<0.001    | 5.9 (4.2 - 8.4), p<0.001 | 5.9 (4.7 - 7.5), p<0.001   |
| Nursing home resident                 | ns, p= 0.547                 | ns, p= 0.634             | 3.5 (2.7 - 4.6), p<0.001   |
| Co-morbidities ≥3                     | 3 (2 - 4.4), p<0.001         | 2.3 (1.6 - 3.3), p<0.001 | 1.7 (1.3 - 2.3), p<0.001   |
| Peripheral vascular disease           | 2.6 (1.8 - 3.9), p<0.001     | 1.9 (1.3 - 2.9), p<0.01  | ns, p= 0.232               |
| Chronic obstructive pulmonary disease | 2.1 (1.4 - 3), p<0.001       | 3.8 (2.8 - 5.2), p<0.001 | 2.2 (1.7 - 2.9), p<0.001   |
| Cardiac failure                       | 2 (1.5 - 2.8), p<0.001       | 1.7 (1.2 - 2.3), p<0.01  | 1.8 (1.4 - 2.3), p<0.001   |
| Chronic kidney disease                | 1.6 (1.2 - 2.1), p<0.01      | ns, p= 0.095             | ns, p= 0.328               |
| Diabetes                              | 1.4 (1.1 - 1.9), p<0.05      | ns, p= 0.465             | ns, p= 0.426               |
| Atrial fibrillation                   | 1.4 (1 - 1.9), p<0.05        | 1.9 (1.4 - 2.6), p<0.001 | ns, p= 0.602               |
| Cancer                                | ns, p= 0.338                 | 1.5 (1.1 - 2), p<0.01    | 2.1 (1.7 - 2.6), p<0.001   |
| Dementia                              | ns, p= 0.878                 | ns, p= 0.505             | 2 (1.5 - 2.6), p<0.001     |
| Asthma                                | ns, p= 0.337                 | 0.7 (0.5 - 1), p<0.05    | ns, p= 0.376               |

1  
2  
3  
4  
5  
6  
7  
8  
9  
10  
11  
12  
13  
14  
15  
16  
17  
18  
19  
20  
21  
22  
23  
24  
25  
26  
27  
28  
29  
30  
31  
32  
33  
34  
35  
36  
37  
38  
39  
40  
41  
42  
43  
44  
45  
46  
47  
48  
49  
50  
51  
52  
53  
54  
55  
56  
57  
58  
59  
60

For peer review only

**Table 6**

Multinomial regression amongst those with a COVID admission restricted to the White, Black and South Asian ethnic groups (n=797) comparing to those with COVID death (n= 259) to those who were alive at 12 weeks. Results are the Odds Ratio with 95% confidence intervals. Variables not listed from Table 1 were excluded stepwise (backwards) as not significant.

| <b>Table 6</b>                       | <b>OR COVID death vs alive</b> |
|--------------------------------------|--------------------------------|
| Age                                  | 1.05 (1.03 - 1.07), p<0.001    |
| Gender (male)                        | 1.91 (1.3 - 2.83), p<0.01      |
| Smoking Current or Ex                | 0.01 (0 - 0.04), p<0.001       |
| Body Mass Index (kg/m <sup>2</sup> ) | 0.92 (0.86 - 0.98), p<0.01     |
| Palliative care registered           | 7.83 (4.21 - 14.56), p<0.001   |
| Co-morbidities ≥3                    | 1.64 (1 - 2.67), p<0.05        |
| Cardiac failure                      | 1.82 (1.14 - 2.92), p<0.05     |
| Chronic kidney disease               | 1.69 (1.09 - 2.63), p<0.05     |
| Peripheral vascular disease          | 2.27 (1.12 - 4.59), p<0.05     |

1 **Figure Legends:**  
2  
3  
4

5 **Figure 1: Age and deprivation in relation to hospital admission and in whole population**  
6  
7

8 The association of age (**a.**) and deprivation (**b.**) with hospital admission type. Figure 1**c.** shows the inter-relationship  
9 of age, deprivation and ethnicity in the whole population (n=228,632) (Other / Unknown ethnic groups not shown).  
10  
11  
12  
13  
14

15 **Figure 2: Mortality by ethnicity**  
16  
17

18 Crude mortality by ethnic grouping as percentages (**a.**  $\chi^2=184.4$ ,  $p<0.001$ ), within the oldest quintile (**b.**  $\chi^2=92.2$ ,  
19  $p<0.001$ ) or restricted to those with a COVID admission excluding those with a non-COVID death (**c.**  $\chi^2=5.92$ ,  
20  $p=0.115$ , ns), (Other / Unknown ethnic categories are not shown but were included in the analysis).  
21  
22  
23  
24  
25  
26  
27  
28  
29  
30  
31  
32  
33  
34  
35  
36  
37  
38  
39  
40  
41  
42  
43  
44  
45  
46  
47  
48  
49  
50  
51  
52  
53  
54  
55  
56  
57  
58  
59  
60

## STROBE Statement—checklist of items that should be included in reports of observational studies

|                              | Item No | Recommendation                                                                                                                                                                                                                                                                                                                                                                                                                                                         | Page No |
|------------------------------|---------|------------------------------------------------------------------------------------------------------------------------------------------------------------------------------------------------------------------------------------------------------------------------------------------------------------------------------------------------------------------------------------------------------------------------------------------------------------------------|---------|
| <b>Title and abstract</b>    | 1       | (a) Indicate the study's design with a commonly used term in the title or the abstract                                                                                                                                                                                                                                                                                                                                                                                 | 1       |
|                              |         | (b) Provide in the abstract an informative and balanced summary of what was done and what was found                                                                                                                                                                                                                                                                                                                                                                    | 3       |
| <b>Introduction</b>          |         |                                                                                                                                                                                                                                                                                                                                                                                                                                                                        |         |
| Background/rationale         | 2       | Explain the scientific background and rationale for the investigation being reported                                                                                                                                                                                                                                                                                                                                                                                   | 5       |
| Objectives                   | 3       | State specific objectives, including any prespecified hypotheses                                                                                                                                                                                                                                                                                                                                                                                                       | 5       |
| <b>Methods</b>               |         |                                                                                                                                                                                                                                                                                                                                                                                                                                                                        |         |
| Study design                 | 4       | Present key elements of study design early in the paper                                                                                                                                                                                                                                                                                                                                                                                                                | 5-6     |
| Setting                      | 5       | Describe the setting, locations, and relevant dates, including periods of recruitment, exposure, follow-up, and data collection                                                                                                                                                                                                                                                                                                                                        | 5-6     |
| Participants                 | 6       | (a) <i>Cohort study</i> —Give the eligibility criteria, and the sources and methods of selection of participants. Describe methods of follow-up<br><i>Case-control study</i> —Give the eligibility criteria, and the sources and methods of case ascertainment and control selection. Give the rationale for the choice of cases and controls<br><i>Cross-sectional study</i> —Give the eligibility criteria, and the sources and methods of selection of participants | n/a     |
|                              |         | (b) <i>Cohort study</i> —For matched studies, give matching criteria and number of exposed and unexposed<br><i>Case-control study</i> —For matched studies, give matching criteria and the number of controls per case                                                                                                                                                                                                                                                 | n/a     |
| Variables                    | 7       | Clearly define all outcomes, exposures, predictors, potential confounders, and effect modifiers. Give diagnostic criteria, if applicable                                                                                                                                                                                                                                                                                                                               | 5       |
| Data sources/<br>measurement | 8*      | For each variable of interest, give sources of data and details of methods of assessment (measurement). Describe comparability of assessment methods if there is more than one group                                                                                                                                                                                                                                                                                   | 5       |
| Bias                         | 9       | Describe any efforts to address potential sources of bias                                                                                                                                                                                                                                                                                                                                                                                                              | 5       |
| Study size                   | 10      | Explain how the study size was arrived at                                                                                                                                                                                                                                                                                                                                                                                                                              | 5       |
| Quantitative variables       | 11      | Explain how quantitative variables were handled in the analyses. If applicable, describe which groupings were chosen and why                                                                                                                                                                                                                                                                                                                                           | 6       |
| Statistical methods          | 12      | (a) Describe all statistical methods, including those used to control for confounding                                                                                                                                                                                                                                                                                                                                                                                  | 6       |
|                              |         | (b) Describe any methods used to examine subgroups and interactions                                                                                                                                                                                                                                                                                                                                                                                                    | 6-9     |
|                              |         | (c) Explain how missing data were addressed                                                                                                                                                                                                                                                                                                                                                                                                                            | 5-6     |
|                              |         | (d) <i>Cohort study</i> —If applicable, explain how loss to follow-up was addressed<br><i>Case-control study</i> —If applicable, explain how matching of cases and controls was addressed<br><i>Cross-sectional study</i> —If applicable, describe analytical methods taking account of sampling strategy                                                                                                                                                              | n/a     |
|                              |         | (e) Describe any sensitivity analyses                                                                                                                                                                                                                                                                                                                                                                                                                                  | n/a     |

Continued on next page

| <b>Results</b>           |     |                                                                                                                                                                                                              |        |
|--------------------------|-----|--------------------------------------------------------------------------------------------------------------------------------------------------------------------------------------------------------------|--------|
| Participants             | 13* | (a) Report numbers of individuals at each stage of study—eg numbers potentially eligible, examined for eligibility, confirmed eligible, included in the study, completing follow-up, and analysed            | 5      |
|                          |     | (b) Give reasons for non-participation at each stage                                                                                                                                                         | n/a    |
|                          |     | (c) Consider use of a flow diagram                                                                                                                                                                           | n/a    |
| Descriptive data         | 14* | (a) Give characteristics of study participants (eg demographic, clinical, social) and information on exposures and potential confounders                                                                     | tables |
|                          |     | (b) Indicate number of participants with missing data for each variable of interest                                                                                                                          | tables |
|                          |     | (c) <i>Cohort study</i> —Summarise follow-up time (eg, average and total amount)                                                                                                                             | n/a    |
| Outcome data             | 15* | <i>Cohort study</i> —Report numbers of outcome events or summary measures over time                                                                                                                          | n/a    |
|                          |     | <i>Case-control study</i> —Report numbers in each exposure category, or summary measures of exposure                                                                                                         | n/a    |
|                          |     | <i>Cross-sectional study</i> —Report numbers of outcome events or summary measures                                                                                                                           | n/a    |
| Main results             | 16  | (a) Give unadjusted estimates and, if applicable, confounder-adjusted estimates and their precision (eg, 95% confidence interval). Make clear which confounders were adjusted for and why they were included | 6-9    |
|                          |     | (b) Report category boundaries when continuous variables were categorized                                                                                                                                    | 6-9    |
|                          |     | (c) If relevant, consider translating estimates of relative risk into absolute risk for a meaningful time period                                                                                             | 6-9    |
| Other analyses           | 17  | Report other analyses done—eg analyses of subgroups and interactions, and sensitivity analyses                                                                                                               | 6-9    |
| <b>Discussion</b>        |     |                                                                                                                                                                                                              |        |
| Key results              | 18  | Summarise key results with reference to study objectives                                                                                                                                                     | 9      |
| Limitations              | 19  | Discuss limitations of the study, taking into account sources of potential bias or imprecision. Discuss both direction and magnitude of any potential bias                                                   | 11     |
| Interpretation           | 20  | Give a cautious overall interpretation of results considering objectives, limitations, multiplicity of analyses, results from similar studies, and other relevant evidence                                   | 9-11   |
| Generalisability         | 21  | Discuss the generalisability (external validity) of the study results                                                                                                                                        | 11     |
| <b>Other information</b> |     |                                                                                                                                                                                                              |        |
| Funding                  | 22  | Give the source of funding and the role of the funders for the present study and, if applicable, for the original study on which the present article is based                                                | 12     |

\*Give information separately for cases and controls in case-control studies and, if applicable, for exposed and unexposed groups in cohort and cross-sectional studies.

**Note:** An Explanation and Elaboration article discusses each checklist item and gives methodological background and published examples of transparent reporting. The STROBE checklist is best used in conjunction with this article (freely available on the Web sites of PLoS Medicine at <http://www.plosmedicine.org/>, Annals of Internal Medicine at <http://www.annals.org/>, and Epidemiology at <http://www.epidem.com/>). Information on the STROBE Initiative is available at [www.strobe-statement.org](http://www.strobe-statement.org).



# BMJ Open

**The risk of COVID hospital admission and COVID mortality during the first COVID 19 wave with a special emphasis on Ethnic Minorities: an observational study of a single, deprived, multi ethnic UK health economy.**

|                                 |                                                                                                                                                                                                                                                                                                                                                                                                                                                                                                                                                                                                                                                                                                                                      |
|---------------------------------|--------------------------------------------------------------------------------------------------------------------------------------------------------------------------------------------------------------------------------------------------------------------------------------------------------------------------------------------------------------------------------------------------------------------------------------------------------------------------------------------------------------------------------------------------------------------------------------------------------------------------------------------------------------------------------------------------------------------------------------|
| Journal:                        | <i>BMJ Open</i>                                                                                                                                                                                                                                                                                                                                                                                                                                                                                                                                                                                                                                                                                                                      |
| Manuscript ID                   | bmjopen-2020-046556.R1                                                                                                                                                                                                                                                                                                                                                                                                                                                                                                                                                                                                                                                                                                               |
| Article Type:                   | Original research                                                                                                                                                                                                                                                                                                                                                                                                                                                                                                                                                                                                                                                                                                                    |
| Date Submitted by the Author:   | 26-Dec-2020                                                                                                                                                                                                                                                                                                                                                                                                                                                                                                                                                                                                                                                                                                                          |
| Complete List of Authors:       | Singh, Baldev; Royal Wolverhampton Hospitals NHS Trust, New Cross Hospital; University of Wolverhampton, School of Medicine & Clinical Practice<br>Bateman, James; Royal Wolverhampton Hospitals NHS Trust, New Cross Hospital<br>Viswanath, Ananth; Royal Wolverhampton Hospitals NHS Trust, New Cross Hospital<br>Klaire, Vijay; Royal Wolverhampton Hospitals NHS Trust, New Cross Hospital<br>Mahmud, Sultan; Royal Wolverhampton Hospitals NHS Trust, New Cross Hospital; Birmingham City University, Faculty of Health, Education & Life Sciences<br>Nevill, Alan; University of Wolverhampton, Faculty of Education Health & Wellbeing<br>Dunmore, Simon; University of Wolverhampton, School of Medicine & Clinical Practice |
| <b>Primary Subject Heading</b>: | Infectious diseases                                                                                                                                                                                                                                                                                                                                                                                                                                                                                                                                                                                                                                                                                                                  |
| Secondary Subject Heading:      | Public health, Epidemiology                                                                                                                                                                                                                                                                                                                                                                                                                                                                                                                                                                                                                                                                                                          |
| Keywords:                       | EPIDEMIOLOGY, PUBLIC HEALTH, COVID-19                                                                                                                                                                                                                                                                                                                                                                                                                                                                                                                                                                                                                                                                                                |
|                                 |                                                                                                                                                                                                                                                                                                                                                                                                                                                                                                                                                                                                                                                                                                                                      |

SCHOLARONE™  
Manuscripts



I, the Submitting Author has the right to grant and does grant on behalf of all authors of the Work (as defined in the below author licence), an exclusive licence and/or a non-exclusive licence for contributions from authors who are: i) UK Crown employees; ii) where BMJ has agreed a CC-BY licence shall apply, and/or iii) in accordance with the terms applicable for US Federal Government officers or employees acting as part of their official duties; on a worldwide, perpetual, irrevocable, royalty-free basis to BMJ Publishing Group Ltd ("BMJ") its licensees and where the relevant Journal is co-owned by BMJ to the co-owners of the Journal, to publish the Work in this journal and any other BMJ products and to exploit all rights, as set out in our [licence](#).

The Submitting Author accepts and understands that any supply made under these terms is made by BMJ to the Submitting Author unless you are acting as an employee on behalf of your employer or a postgraduate student of an affiliated institution which is paying any applicable article publishing charge ("APC") for Open Access articles. Where the Submitting Author wishes to make the Work available on an Open Access basis (and intends to pay the relevant APC), the terms of reuse of such Open Access shall be governed by a Creative Commons licence – details of these licences and which [Creative Commons](#) licence will apply to this Work are set out in our licence referred to above.

Other than as permitted in any relevant BMJ Author's Self Archiving Policies, I confirm this Work has not been accepted for publication elsewhere, is not being considered for publication elsewhere and does not duplicate material already published. I confirm all authors consent to publication of this Work and authorise the granting of this licence.

1 **Title**

2  
3  
4  
5  
6  
7 The risk of COVID hospital admission and COVID mortality during the first COVID 19 wave with a special emphasis on  
8 Ethnic Minorities: an observational study of a single, deprived, multi ethnic UK health economy.  
9

10  
11  
12  
13  
14 **Authors**

15  
16  
17 Baldev M SINGH, James BATEMAN (0000-0003-1952-2821), Ananth VISWANATH, Vijay KLAIRE, Sultan MAHMUD,  
18 Alan M NEVILL (0000-0003-0506-3652), Simon J DUNMORE (0000-0001-7227-5597)  
19  
20  
21  
22  
23

24 **Addresses, positions**

25  
26  
27 The Royal Wolverhampton NHS Trust, New Cross Hospital, Wolverhampton, WV10 0QP, UK; Professor  
28 Baldev M Singh, Consultant; Dr James Bateman, Consultant; Dr Ananth Viswanath, Consultant; Professor  
29 Sultan Mahmud, Director of Innovation, Integration and Research; Vijay Klaire, Integrated Care Business  
30 Intelligence Lead  
31  
32  
33

34  
35 School of Medicine and Clinical Practice, Faculty of Science and Engineering, University of Wolverhampton,  
36 Wolverhampton, WV1 1LY, UK; Dr Simon J Dunmore, Reader; Professor Baldev M Singh, Medical Director  
37  
38

39 Faculty of Health, Education & Life Sciences, Birmingham City University, Birmingham, B15 3TN; Professor  
40 Sultan Mahmud, Professor  
41  
42  
43

44 Faculty of Education Health & Wellbeing, University of Wolverhampton, Walsall Campus, Walsall, WS1 3BD,  
45 UK; Professor Alan M Nevill, Professor  
46  
47  
48  
49  
50

51 **Key words:** Hospital; admission; mortality, COVID-19; ethnicity; deprivation; co-morbidity  
52  
53  
54  
55  
56  
57  
58  
59  
60

1 **Corresponding Author & Guarantor:**  
2  
3

4 Professor Baldev M SINGH, The Royal Wolverhampton NHS Trust, New Cross Hospital, Wolverhampton, WV10 0QP,  
5 UK & School of Medicine and Clinical Practice, Faculty of Science and Engineering, University of Wolverhampton,  
6 Wolverhampton, WV1 1LY, UK; email: [baldev.singh@nhs.net](mailto:baldev.singh@nhs.net)  
7  
8  
9

10 **Copyright:** The Corresponding Author has the right to grant on behalf of all authors and does grant on behalf of all  
11 authors, an exclusive licence on a worldwide basis to the BMJ Publishing Group Ltd to permit this article (if accepted)  
12 to be published in BMJ editions and any other BMJ PGL products and sublicences such use and exploit all subsidiary  
13 rights, as set out in our licence  
14  
15  
16  
17  
18  
19  
20  
21  
22  
23  
24  
25  
26  
27  
28  
29  
30  
31  
32  
33  
34  
35  
36  
37  
38  
39  
40  
41  
42  
43  
44  
45  
46  
47  
48  
49  
50  
51  
52  
53  
54  
55  
56  
57  
58  
59  
60

For peer review only

## Abstract

### Objectives

To describe variations in Covid-19 outcomes in relation to local risks within a well-defined but diverse single-city area

### Design

Observational study of COVID-19 outcomes using quality-assured integrated data from a single UK hospital contextualised to its feeder-population and associated factors (comorbidities, ethnicity, age, deprivation).

### Setting/Participants

Single-city hospital with a feeder-population of 228,632 adults in Wolverhampton.

### Main Outcome Measures

Hospital admissions (defined as COVID or non-COVID admissions) and mortality (defined as COVID deaths or non-COVID deaths).

### Results

5558 patients admitted, 686 died (556 in hospital); 930 were COVID-19 admissions (CA), of which 270 were hospital COVID deaths, 47 non-COVID deaths, 36 deaths post-discharge; 4628 non-COVID-19 admissions (NCA), 239 in-hospital deaths (2 COVID), 94 deaths post-discharge. 223,074 adults not-admitted, 407 died. Age, gender, multi-morbidity and Black ethnicity (OR 2.1 [95%CI 1.5-3.2]  $p < 0.001$ , compared with White ethnicity, absolute excess risk of  $< 1/1,000$ ) were associated with COVID-19 admission and mortality. The South Asian cohort had lower CA and NCA, lower mortality compared to the White group (CA (0.5[0.3-0.8],  $p < 0.01$ ), NCA (0.4[0.3-0.6]  $p < 0.001$ ), community deaths (0.5[0.3-0.7]  $p < 0.001$ ). Despite many common risk-factors for CA and NCA, ethnic groups had different admission rates, and within-groups differing association of risk-factors. Deprivation impacted only in White ethnicity, in the oldest age bracket and in a lesser (not most) deprived quintile.

### Conclusions

Wolverhampton's results, reflecting high ethnic diversity and deprivation, are similar to other studies for Black ethnicity, age and comorbidity risk in COVID-19 but strikingly different in South Asians and for deprivation. Sequentially considering population, then hospital-based NCA and CA outcomes, we present a complete single health-economy picture. Risk-factors may differ within ethnic groups; our data may be more representative of communities with high BAME populations, highlighting the need for locally focussed public health strategies. We emphasise the need for a more comprehensible and nuanced conveyance of risk.

**Strengths and limitations of this study**

- In contrast to the majority of other studies of factors related to COVID-19 morbidity and mortality we used data from both a single city hospital and its feeder population
- Our observational study used a high quality and complete dataset from the local population and the hospital serving it to examine the association of purported risk factors with severity and mortality.
- Our study method enables assessment of the importance of evaluating such risks in the local, and not just national, population setting taking into account the local variations in patient backgrounds
- This nuanced approach factors in regional variation in elements such as ethnicity and deprivation by being specifically linked to the source population
- Although limiting our study to our local population makes our findings less generalisable it nevertheless allows evaluation of the importance of demographic and geographical variation.

## Introduction

In understanding the natural history of disease, fundamental to healthcare, the COVID-19 (hereafter referred to as “COVID”) pandemic highlights issues within data repositories. Constructing multiple source datasets has complexity in case definition, data acquisition, integration, quality, completeness, coding accuracy and the clinical meaning of analysis outcomes.<sup>1-4</sup> Emphasising this challenge, national UK data were initially collated via the Patient Notification System, requiring a positive swab test up until the 28<sup>th</sup> April 2020 but revised to include clinical definitions given an estimated false negative rate testing rate of up to 29%.<sup>5-8</sup> Well-established primary care databases, may have significant inaccuracy and do not include hospital secondary care information.<sup>9</sup> A large UK primary care epidemiological study also used national COVID (SARS-CoV-2) positive swab cases for case definition.<sup>2</sup> Conversely, secondary care case series and international registry studies for specific diseases are not linked to primary care datasets.<sup>10-14</sup> Numerous studies have described the risk factors associated with COVID-19 mortality, which have been from primary care, secondary care and meta-analyses.<sup>15,16</sup> Although these studies describe risk factors for severity, admission, and mortality with COVID-19 infection, they typically either use large secondary care or primary care data sources, without amalgamating this data. Therefore important caveats exist in utilising and interpreting such data and drawing clinically important conclusions regarding the adverse associations of ethnicity with outcomes.<sup>2,17</sup>

Our objective, therefore, was to establish a tightly governed comprehensive, multi-source, integrated, quality assured local structured clinical data set, used for the purposes of direct care, define cohorts at risk, to systematically improve clinical coding and mortality recording accuracy, and to enable an informed understanding of factors influencing hospital activity, including admissions and most especially to describe variations in Covid-19 outcomes in relation to local risks within a well-defined but diverse single city area.. This approach should ultimately inform public health initiatives. We present a proof of principle study to evaluate the utility of this approach in relation to a single UK city wide health district, reporting our findings regarding population wide factors that may have an association with 2 key COVID outcomes, hospital admission and mortality, over the first 12 weeks of the pandemic in this City.

## Methods

### General Method

The time frame spanned 1/3/2020 to 24/05/2020.

Data were integrated into an SQL database from primary care, community and hospital clinical and pathology systems for all people resident in Wolverhampton or registered to Wolverhampton practices and those from immediately adjacent districts with emergency admission to New Cross Hospital (NXH). Only those alive at the start point were included and subsequently death and date of death were tracked. The final total population aged >18 was 228,632, of whom 1063 were resident but not Wolverhampton GP registered, 1521 who were registered but not

1 City resident and 1026 neither resident nor registered from immediately surrounding areas with an emergency  
2 admission to NXH, such that 99.5% of the cohort were registered and/or resident constituting 88% of COVID  
3 admissions and 91% COVID deaths. The Index of Multiple Deprivation (IMD) was allocated according to  
4 postcode. Unavailable smoking status (15%) was reallocated to “non-smoker” (recognising that this is an  
5 assumption which may potentially introduce slight bias). Missing body mass index (22%) were replaced by the age-  
6 related (5-year band) mean value in the cohort. Ethnicity data from all sources were reviewed, only unambiguous  
7 data were accepted, and recoded into Caucasian (White), South-Asian, Black, Mixed Ethnicity, Chinese with 7.5%  
8 remaining “Unknown”. Comorbidities were accrued and cross-checked from primary care and hospital coding to  
9 include: Asthma, COPD, Diabetes, Hypertension, Coronary Artery Disease, Stroke and Peripheral Arterial Disease,  
10 Chronic Heart Failure, Atrial Fibrillation, Chronic Kidney Disease, Cancer, Dementia, Depression, other Mental Health  
11 Disorders, Epilepsy, Learning Difficulties, Osteoarthritis, Rheumatoid arthritis as well as recorded nursing home  
12 residency and palliative care status. Non-elective admissions over the preceding 12 months were  
13 ascertained. During admission, the COVID clinical status was recorded by the Infection Diseases team or the clinical  
14 team in daily updates as “COVID definite”, “COVID probable” or “not COVID”. Formal endpoint coding was in  
15 duplicate with a rolling triangulation audit in place comparing the clinical diagnosis, the coded diagnosis and COVID  
16 pathology status for coding accuracy. Mortality and cause of death were certified in our Medical Examiner System  
17 and also continuously cross-checked against the coded status. COVID coding and death certification arbitration were  
18 supported by the accountable senior responsible consultant (AV). Further validation against the National Strategic  
19 Tracing Service captured deaths outside hospital.

### 34 **Statistical Analysis**

37 This was undertaken in SPSS v26. Factors analysis of all variables considered confounding effects and redundancy,  
38 yielding a 9 component rotated solution explaining 48% of the variance: deprivation and ethnicity were strongly co-  
39 associated in a single component whilst the two principal outcome measures of hospital admission and mortality  
40 were in another distinct component. We adopted a multinomial regression analysis approach. This allowed the  
41 association of those independent factors with the dependent categorical variable, yielding Odds ratios, with their  
42 95% confidence intervals and statistical significance. The analysis was undertaken sequentially to ensure an *a priori*  
43 justification for further analysis. Statistical tests are described in the text and their results considered significant at  
44  $p < 0.05$ .

### 52 **Ethical Approval**

54 This was not sought nor deemed necessary since this work represents a continuous quality improvement  
55 programme of the informatics component of service changes required between various local NHS organisations  
56 for integrated working stipulated during the COVID 19 emergency. Data governance was in line Trust policy and  
57 with the COVID emergency directive of NHS England.



1 **Patient and Public Involvement:** None (not applicable to this type of study)  
 2  
 3  
 4  
 5  
 6

## 7 Results

### 10 Hospital Admissions

11  
 12 The population characteristics are shown in Table 1, grouped according to admission status (No Admission, Non-  
 13 COVID Admission and COVID Admission (NA, NCA, CA respectively) together with their mortality rates.  
 14  
 15

16 **Table 1**

17 The demographic, clinical features and mortality outcomes of a whole adult population (n= 228,632) categorised according to  
 18 their hospital admission status during 12 weeks of the UK COVID-19 pandemic. Data are presented as the mean± SD or as  
 19 percentages. Between groups analysis is by ANOVA or by Chi square for scale or categorical variables respectively. Co-  
 20 morbidities are listed in descending order of frequency.  
 21  
 22  
 23

| 24 Table 1                               | 25 Whole population   | 26 Not admitted | 27 Non COVID Admission | 28 COVID Admission |         |
|------------------------------------------|-----------------------|-----------------|------------------------|--------------------|---------|
| 29 Number (% of total)                   | 228,632               | 223,074 (97.6%) | 4,628 (2%)             | 930 (0.4%)         |         |
| 30 Age (years)                           | 50.0 ± 18.8           | 47.6 ± 18.5     | 63.1 ± 20.5            | 71.4 ± 16.5        | p<0.001 |
| 31 Gender (male, %)                      | 114,866 (50.2%)       | 50.3%           | 48.4%                  | 55.2%              | p<0.001 |
| 32 Ethnicity (% in category)             |                       |                 |                        |                    |         |
| 33 · White                               | 142,781 (62.5%)       | 62.1%           | 77.7%                  | 73.5%              | p<0.001 |
| 34 · South Asian                         | 44,229 (19.3%)        | 19.6%           | 10.4%                  | 8.9%               |         |
| 35 · Black                               | 17,858 (7.8)          | 7.9%            | 4.6%                   | 12.2%              |         |
| 36 · Mixed                               | 5,809 (2.5%)          | 2.6%            | 1.3%                   | 0.6%               |         |
| 37 · Chinese                             | 806 (0.4%)            | 0.4%            | 0.1%                   | 0.2%               |         |
| 38 · Unknown                             | 17,149 (7.5%)         | 7.5%            | 5.8%                   | 4.5%               |         |
| 39 Index of Multiple Deprivation         | 32.8 ± 15.9           | 32.9 ± 15.9     | 30.4 ± 14.4            | 30.7 ± 14.4        | p<0.001 |
| 40 Smoking status (% never)              | 148,046 (64.8%)       | 65%             | 73%                    | 81%                | p<0.001 |
| 41 Body Mass Index (kg/m <sup>2</sup> )  | 27.3 (± 5.7)          | 27.3 (± 5.7)    | 27.8 (± 5.1)           | 27.9 (± 4.6)       | p<0.001 |
| 42 Prior admission (Any 1 year, (≥3) (%) | 15,119 (7%) (0.6%)    | 6% (0.4%)       | 31% (7%)               | 35% (8%)           | p<0.001 |
| 43 Any comorbidity (≥3) (%)              | 110,564 (48 %) (12 %) | 48% (11%)       | 77% (41%)              | 88% (58%)          | p<0.001 |
| 44 Palliative care registered            | 1,530 (0.7%)          | 0.5%            | 4.9%                   | 13.9%              | p<0.001 |
| 45 Nursing home resident                 | 2,130 (0.9%)          | 0.8%            | 4.7%                   | 9.7%               | p<0.001 |
| 46 Hypertension                          | 47,830 (20.9%)        | 20.2%           | 47.6%                  | 64.2%              | p<0.001 |
| 47 Depression                            | 39,153 (17%)          | 17.0%           | 22.4%                  | 18.7%              | p<0.001 |
| 48 Asthma                                | 30,335 (13.3%)        | 13.2%           | 16.1%                  | 16.3%              | p<0.001 |
| 49 Diabetes                              | 20,529 (9.0%)         | 8.6%            | 21.4%                  | 33.8%              | p<0.001 |
| 50 Ischaemic heart disease               | 10,965 (4.8%)         | 4.4%            | 19.9%                  | 23.2%              | p<0.001 |
| 51 Chronic kidney disease                | 10,265 (4.5%)         | 4.1%            | 17.6%                  | 29.0%              | p<0.001 |
| 52 Cancer                                | 9,796 (4.3%)          | 4.0%            | 16.0%                  | 17.8%              | p<0.001 |
| 53 Atrial fibrillation                   | 6,771 (3.0%)          | 2.6%            | 4.7%                   | 8.7%               | p<0.001 |
| 54 Chronic obstructive pulmonary disease | 6,762 (3.0%)          | 2.7%            | 12.3%                  | 15.1%              | p<0.001 |
| 55 Cerebro-vascular disease              | 5,359 (2.3%)          | 2.2%            | 8.8%                   | 13.5%              | p<0.001 |
| 56 Cardiac failure                       | 4,940 (2.2%)          | 1.9%            | 13.1%                  | 20.8%              | p<0.001 |

|                             |              |           |                        |                       |         |
|-----------------------------|--------------|-----------|------------------------|-----------------------|---------|
| Osteoarthritis              | 4,267 (1.9%) | 1.7%      | 8.0%                   | 11.2%                 | p<0.001 |
| Epilepsy                    | 4,035 (1.8%) | 1.7%      | 3.8%                   | 4.5%                  | p<0.001 |
| Rheumatoid arthritis        | 3,284 (1.4%) | 1.4%      | 4.2%                   | 6.2%                  | p<0.001 |
| Mental health disorder      | 2,967 (1.3%) | 1.3%      | 1.7%                   | 1.7%                  | p<0.05  |
| Peripheral vascular disease | 2,724 (1.2%) | 1.1%      | 4.7%                   | 8.7%                  | p<0.001 |
| Dementia                    | 2,304 (1.0%) | 0.9%      | 4.0%                   | 7.8%                  | p<0.001 |
| Learning difficulties       | 1,597 (0.7%) | 0.7%      | 1.0%                   | 1.2%                  | p<0.05  |
| Vital status (n, % died)    | 1,093 (0.5%) | 407, 0.2% | 333, 7.2% <sup>§</sup> | 353, 38% <sup>+</sup> | p<0.001 |

<sup>§</sup>, 237 non-COVID hospital deaths, 94 post discharge deaths in community, 2 hospital COVID deaths; <sup>+</sup>, 270 hospital COVID deaths, 47 non-COVID hospital deaths, 36 post discharge deaths in community

Compared to NA, there was an increased association of all variables with NCA and CA, including age, the number of comorbidities, most individual comorbidities, the surrogate measures of dependency (of being on a palliative care register or nursing home resident), and prior history of emergency admissions. Male gender, BMI, IMD and smoking status were significantly different between the 3 categories. Ethnic minority groupings were significantly different between admission types with the South Asian population prevalence in CA being 46% of that in the comparator NA population whilst the Black population appeared to have a 56% excess. Table 2 gives further numerical detail.

**Table 2**

COVID admission and death by ethnic category showing numbers, absolute rates per 1000 population, and the excess risk and ORs (95% CI) vs the White group as comparator.

*“Chinese”, “Mixed” and “Unknown” categories showed no significant associations as individual categories in this analysis or when merged as “Other” or “Unknown”.*

| Table 2                            | White         | South Asian                 | Black                       | Other or Unknown            |
|------------------------------------|---------------|-----------------------------|-----------------------------|-----------------------------|
| Total numbers                      | 142,781 (63%) | 44, 229 (19%)               | 17,858 (8%)                 | 23,764 (10%)                |
| COVID admission                    | 684 (74%)     | 83 (9%)                     | 113 (12%)                   | 50 (5%)                     |
| COVID admission/ 1000              | 4.8           | 1.9                         | 6.3                         | 2.1                         |
| COVID admission excess risk / 1000 | comparator    | -2.9                        | 1.5                         | -2.7                        |
| COVID admission OR                 | comparator    | 0.39 (0.31 - 0.48), p<0.001 | 1.31 (1.07 - 1.59), p<0.001 | 0.43 (0.33 - 0.58), p<0.001 |
| COVID death                        | 190 (70%)     | 32 (12%)                    | 39 (14%)                    | 11 (4%)                     |
| COVID death/ 1000                  | 1.3           | 0.7                         | 2.2                         | 0.5                         |
| COVID death excess risk / 1000     | comparator    | -0.6                        | 0.9                         | -0.9                        |
| COVID death OR                     | comparator    | 0.54 (0.37 - 0.79), p<0.01  | 1.64 (1.16 - 2.31), p<0.01  | 0.35 (0.19 - 0.64), p<0.01  |

|                                              |     |                                 |                                   |                                 |
|----------------------------------------------|-----|---------------------------------|-----------------------------------|---------------------------------|
| COVID death / COVID admission / 1000         | 0.3 | 0.4                             | 0.3                               | 0.2                             |
| COVID death in COVID admission OR comparator |     | 1.55 (0.96 - 2.51), p=0.075, ns | 1.19 (0.78 - 1.83), p = 0.423, ns | 0.63 (0.32 - 1.25), p=0.187, ns |

The 3 hospital admissions categories (NA, NCA, CA) were taken as the response variable and submitted to multinomial regression (Table 3). The complete model was highly significant ( $\chi^2=8,869.1$ ,  $p<0.001$ ). Male gender was more prevalent in CA.

**Table 3**

Multinomial regression for the association of factors with COVID or Non COVID related emergency hospital admissions (HA) compared to the reference category of those not admitted (n=223, 074). Data are the Odds Ratio (OR) with 95% confidence intervals. For age and IMD as categorical ordinal variables (data ranges shown), the comparators were the youngest and least deprived quintiles respectively. Comorbidities associations are listed in descending OR order for the CA group. The comparison of CA vs NCA was by binary logistic regression. Variables not listed (Table 1) were excluded stepwise as not significant.

| Table 3                               | COVID HA                   | Non COVID HA             | CHA vs NCHA              |
|---------------------------------------|----------------------------|--------------------------|--------------------------|
| Number (%of population)               | 930 (0.4%)                 | 4,628 (2%)               |                          |
| Gender (male)                         | 1.5 (1.3 - 1.7), p<0.001   | ns, p=0.48               | 1.3 (1.1 - 1.5), p<0.001 |
| Age category Q2 (30 -40)              | 2.7 (1.5 - 5), p<0.01      | 1.2 (1 - 1.3), p<0.05    | 2.2 (1.2 - 4), p<0.05    |
| Age category Q3 (41 - 51)             | 5.1 (2.9 - 9), p<0.001     | 1.4 (1.2 - 1.6), p<0.001 | 3.2 (1.8 - 5.8), p<0.001 |
| Age category Q4 (52 - 65)             | 7.8 (4.6 - 13.4), p<0.001  | 1.7 (1.5 - 1.9), p<0.001 | 3.7 (2.1 - 6.5), p<0.001 |
| Age category Q5 (66 - 113)            | 16.6 (9.7 - 28.3), p<0.001 | 2.9 (2.5 - 3.3), p<0.001 | 4.7 (2.7 - 8.1), p<0.001 |
| IMD category Q2 (16.5 - 27.7)         | 1.8 (1.4 - 2.2), p<0.001   | 2 (1.8 - 2.2), p<0.001   | ns                       |
| IMD category Q3 (27.8 - 39.0)         | 1.7 (1.4 - 2.1), p<0.001   | 1.5 (1.4 - 1.7), p<0.001 | ns                       |
| IMD category Q4 (39.3 - 45.7)         | 1.6 (1.3 - 2), p<0.001     | 1.4 (1.3 - 1.6), p<0.001 | ns                       |
| IMD category Q5 (45.7 - 71.8)         | ns, p=0.517                | ns, p=0.574              | ns                       |
| Ethnicity South Asian                 | 0.4 (0.3 - 0.5), p<0.001   | 0.5 (0.4 - 0.5), p<0.001 | 1 (0.7 - 1.2), ns, 0.735 |
| Ethnicity Black                       | 1.7 (1.3 - 2.1), p<0.001   | 0.6 (0.5 - 0.7), p<0.001 | 3.1 (2.4 - 4), p<0.001   |
| Smoking Current or Ex                 | 0.3 (0.2 - 0.3), p<0.001   | 0.5 (0.4 - 0.5), p<0.001 | 0.7 (0.5 - 0.8), p<0.001 |
| Prior emergency admissions (1 year)   | 1.6 (1.5 - 1.7), p<0.001   | 1.8 (1.7 - 1.8), p<0.001 | 0.9 (0.9 - 1), p<0.05    |
| Palliative care registered            | 4.1 (3.2 - 5.1), p<0.001   | 1.7 (1.4 - 2), p<0.001   | 2.4 (1.9 - 3.1), p<0.001 |
| Nursing home resident                 | 1.7 (1.3 - 2.3), p<0.001   | 1.2 (1 - 1.5), ns, 0.058 | 1.7 (1.3 - 2.2), p<0.001 |
| Co-morbidities $\geq 3$               | 1.5 (1.2 - 1.9), p<0.01    | 1.4 (1.3 - 1.6), p<0.001 | ns                       |
| Chronic obstructive pulmonary disease | 1.9 (1.5 - 2.3), p<0.001   | 1.8 (1.6 - 2), p<0.001   | ns                       |
| Peripheral vascular disease           | 1.8 (1.4 - 2.3), p<0.001   | 1.2 (1 - 1.4), p<0.05    | 1.5 (1.1 - 2), p<0.01    |
| Atrial fibrillation                   | 1.7 (1.4 - 2.1), p<0.001   | 1.4 (1.2 - 1.5), p<0.001 | 1.3 (1.1 - 1.6), p<0.01  |

|    |                          |                          |                          |                          |
|----|--------------------------|--------------------------|--------------------------|--------------------------|
| 1  | Diabetes                 | 1.6 (1.4 - 1.9), p<0.001 | 1.3 (1.2 - 1.4), p<0.001 | 1.4 (1.2 - 1.6), p<0.001 |
| 2  |                          |                          |                          |                          |
| 3  | Cardiac failure          | 1.6 (1.3 - 1.9), p<0.001 | 1.4 (1.2 - 1.6), p<0.001 | ns                       |
| 4  | Rheumatoid arthritis     | 1.5 (1.1 - 2), p<0.01    | ns, p=0.134              | ns                       |
| 5  |                          |                          |                          |                          |
| 6  | Epilepsy                 | 1.4 (1 - 2), p<0.05      | 1.4 (1.2 - 1.6), p<0.001 | ns                       |
| 7  | Chronic kidney disease   | 1.3 (1.1 - 1.6), p<0.01  | 1.2 (1 - 1.3), p<0.01    | ns                       |
| 8  |                          |                          |                          |                          |
| 9  | Hypertension             | 1.2 (1 - 1.5), p<0.05    | ns, p=0.196              | 1.2 (1 - 1.4), p<0.05    |
| 10 |                          |                          |                          |                          |
| 11 | Cancer                   | 1.2 (1 - 1.5), p<0.05    | 1.6 (1.5 - 1.8), p<0.001 | 0.8 (0.7 - 1), p<0.05    |
| 12 | Cerebro-vascular disease | ns, p=0.101              | 1.2 (1 - 1.3), p<0.05    | ns                       |
| 13 |                          |                          |                          |                          |
| 14 | Ischaemic heart disease  | ns, p=0.859              | 1.5 (1.3 - 1.6), p<0.001 | 0.7 (0.6 - 0.9), p<0.01  |
| 15 | Depression               | ns, p=0.34               | 1.1 (1 - 1.2), p<0.01    | ns                       |
| 16 |                          |                          |                          |                          |
| 17 | Dementia                 | ns, p=0.059              | 0.8 (0.7 - 1), p<0.05    | ns                       |
| 18 |                          |                          |                          |                          |

Age distribution (Figure 1a) differed significantly for CA and NCA versus NA, and the two admission groups differed significantly from each other, reflecting the higher mean age in CA. The pattern for deprivation (Figure 1b) showed the peak admission rates to be in the second least deprived quintile with the most deprived quintile not being significantly different from the least deprived quintile, whilst the 2 admission groups did not differ significantly from each other in this regard. There was a decreased relative risk for admission in either group with current or previous smoking. Both admission groupings had a significantly increased history of prior emergency admissions, established multi-morbidity, being nursing home resident or in a palliative phase of care with these latter two characteristics in significantly higher prevalence in CA compared to NCA. Both groups shared individual comorbidities in higher risk, but with some differential effect for diabetes, hypertension, atrial fibrillation and peripheral vascular disease which were increased in CA.

The South Asian ethnic group was less likely to have a CA or NCA (60% and 50% crude percentage reduced risk respectively) compared to the White ethnic reference category whilst the Black ethnic group shared the significant propensity not to have an NCA but had a markedly increased relative risk (70%) for CA. Ethnicity related outcomes were examined specifically amongst those with COVID admission, by comparing those admitted to those not admitted within their ethnic category in separate binary regression analyses (all  $\chi^2 > 252.4$ ,  $p < 0.001$ ) (Table 4).

**Table 4**

Outcomes by individual ethnic category for those specifically with COVID hospital admissions compared those not admitted within individual ethnic grouping as examined in binary regression analysis. Values are the Odds Ratio with 95%CI.

| Table 4                             | Black                            | South Asian                       | White                           |
|-------------------------------------|----------------------------------|-----------------------------------|---------------------------------|
| Numbers admitted / not admitted     | 113 (0.6%) / 17,530              | 83 (0.2%) / 43,663                | 684 (0.5%) / 138,500            |
| Gender (male)                       | ns                               | 2 (1.2 - 3.2), $p < 0.01$         | 1.6 (1.4 - 1.9), $p < 0.001$    |
| Age category Q2 (30 - 40)           | 2.3 (0.6 - 8.6), ns, $p = 0.225$ | 1.8 (0.5 - 6.8), ns, $p = 0.417$  | 3 (1.3 - 6.8), $p < 0.01$       |
| Age category Q3 (41 - 51)           | 3.1 (0.9 - 11), ns, $p = 0.083$  | 2.6 (0.7 - 9.3), ns, $p = 0.148$  | 4.9 (2.2 - 10.5), $p < 0.001$   |
| Age category Q4 (52 - 65)           | 3.8 (1.1 - 13.4), $p < 0.05$     | 3.1 (0.9 - 10.8), ns, $p = 0.082$ | 9.7 (4.7 - 20), $p < 0.001$     |
| Age category Q5 (66 - 113)          | 10 (2.8 - 36), $p < 0.001$       | 4.5 (1.3 - 16), $p < 0.05$        | 21.2 (10.4 - 43.3), $p < 0.001$ |
| IMD category Q2 (16.5 - 27.7)       | ns                               | ns                                | 1.7 (1.4 - 2.1), $p < 0.001$    |
| IMD category Q3 (27.8 - 39.0)       | ns                               | ns                                | 1.6 (1.3 - 2.1), $p < 0.001$    |
| IMD category Q4 (39.3 - 45.7)       | ns                               | ns                                | 1.5 (1.2 - 2), $p < 0.01$       |
| IMD category Q5 (45.7 - 71.8)       | ns                               | ns                                | ns,                             |
| Smoking Current or Ex               | 0.3 (0.2 - 0.6), $p < 0.001$     | 0.2 (0.1 - 0.6), $p < 0.01$       | 0.3 (0.2 - 0.3), $p < 0.001$    |
| Prior emergency admissions (1 year) | ns                               | 1.5 (1.2 - 1.8), $p < 0.001$      | 1.5 (1.4 - 1.6), $p < 0.001$    |
| Palliative care registered          | 3.8 (1.8 - 8), $p < 0.001$       | 11 (5.5 - 21.7), $p < 0.001$      | 3.8 (2.9 - 5), $p < 0.001$      |
| Nursing home resident               | ns                               | 4.5 (1.4 - 14.2), $p < 0.05$      | 1.6 (1.1 - 2.2), $p < 0.01$     |
| Co-morbidities $\geq 3$             | 2.6 (1.5 - 4.4), $p < 0.001$     | ns                                | 1.7 (1.3 - 2.1), $p < 0.001$    |
| Atrial fibrillation                 | 2 (1 - 3.7), $p < 0.05$          | 2.8 (1.4 - 5.6), $p < 0.01$       | 1.6 (1.3 - 2), $p < 0.001$      |
| Cardiac failure                     | 2.2 (1.2 - 3.9), $p < 0.05$      | ns                                | 1.7 (1.3 - 2.1), $p < 0.001$    |

|                                       |                         |                          |                          |
|---------------------------------------|-------------------------|--------------------------|--------------------------|
| Chronic kidney disease                | ns                      | ns                       | 1.4 (1.1 - 1.7), p<0.01  |
| Chronic obstructive pulmonary disease | ns                      | ns                       | 1.9 (1.5 - 2.3), p<0.001 |
| Diabetes                              | ns                      | 4.4 (2.6 - 7.5), p<0.001 | 1.5 (1.3 - 1.9), p<0.001 |
| Hypertension                          | 2.2 (1.2 - 4.1), p<0.01 | ns                       | ns                       |
| Peripheral vascular disease           | ns                      | 3.7 (1.6 - 8.8), p<0.01  | 1.9 (1.4 - 2.5), p<0.001 |
| Rheumatoid arthritis                  | ns                      | ns                       | 1.6 (1.1 - 2.1), p<0.01  |

Age, gender, preceding emergency admissions, palliative phase, comorbidity, and nursing home residence were significant associations in 2 or more of the ethnic groups. Of note, patterns of significantly associated individual comorbidities were different between the ethnic groups: Black - hypertension, atrial fibrillation and cardiac failure; South Asian - diabetes, peripheral vascular disease and atrial fibrillation; White - specific association with COPD, CKD, and RA. Deprivation had a significant impact only in the White group. The inter-relationship of age, deprivation with ethnicity and the impact of white ethnicity in the oldest quintile in lesser deprived categories can be seen in Figure 1c. In a simplified model of admission type and ethnicity ( $\chi^2=4542.9$ ,  $p<0.001$ ) with only age and deprivation entered categorically together with their interaction ( $\chi^2= 412.7$ ,  $p<0.001$ ), the ORs for CA compared to Whites were Black 2.08 (1.70 - 2.57) ( $p<0.001$ ) and South Asian 0.56 (0.44 – 0.70) ( $p<0.001$ ), with both groups still less likely to have NCA ( $p<0.001$ ).

#### Absolute risk of COVID Admission within Ethnic groups

The absolute risk from COVID hospital admission was 4.8 / 1000 population and Table 2 shows this broken down by ethnic grouping giving numbers, percentages, absolute risk and excess risk with ORs compared to the White group, with the South Asian group showing a lower and the Black group a higher absolute risk as reflected in the ORs.

#### Mortality outcomes

COVID and non-COVID hospital death and death in the community (CHD, NCHD, DIC) were analysed in stepwise backwards multinomial regression ( $\chi^2=5,548.3$ ,  $p<0.001$ ) (Table 5).

**Table 5**

Multinomial regression of mortality outcomes over the 12 weeks period for those that died (n= 1093) either in the community (n= 537) or Non COVID (n = 284) and COVID related (n= 272) hospital deaths (HD) (See Table 1) compared to those who were alive (n = 227, 539). Results are the Odds ratio with 95% confidence intervals. For age and IMD categories the comparators were the youngest and least deprived quintile respectively. Variables not listed from Table 1 were excluded stepwise (backwards) as not significant.

| Table 5 | COVID HD | Non COVID HD | Community Death |
|---------|----------|--------------|-----------------|
|---------|----------|--------------|-----------------|

|                                       |                              |                          |                            |
|---------------------------------------|------------------------------|--------------------------|----------------------------|
| Gender (male)                         | 2 (1.5 - 2.6), p<0.001       | 1.5 (1.2 - 1.9), p<0.01  | 1.7 (1.4 - 2.1), p<0.001   |
| Age category Q2 (30 -40)              | ns, p= 0.997                 | >100, p<0.001            | ns, p= 0.85                |
| Age category Q3 (41 - 51)             | 2.5 (0.5 - 14), ns, p= 0.283 | >100, p<0.001            | 6.6 (1.9 - 22.6), p<0.01   |
| Age category Q4 (52 - 65)             | 10.5 (2.4 - 44.8), p<0.01    | >100, p<0.001            | 13.9 (4.3 - 44.9), p<0.001 |
| Age category Q5 (66 - 113)            | 39.9 (9.6 - 165.5), p<0.001  | >100, p<0.001            | 41.3 (13 - 130.9), p<0.001 |
| IMD category Q2 (16.5 - 27.7)         | ns, p= 0.163                 | 1.8 (1.2 - 2.6), p<0.01  | ns, p= 0.708               |
| IMD category Q3 (27.8 - 39.0)         | 1.5 (1 - 2.2), p<0.05        | 2.2 (1.5 - 3.1), p<0.001 | ns, p= 0.054               |
| IMD category Q4 (39.3 - 45.7)         | ns, p= 0.319                 | 1.8 (1.2 - 2.7), p<0.01  | ns, p= 0.384               |
| IMD category Q5 (45.7 - 71.8)         | ns, p= 0.713                 | ns, p= 0.455             | 1.6 (1.2 - 2.1), p<0.01    |
| Ethnicity South Asian                 | 0.5 (0.3 - 0.8), p<0.01      | 0.4 (0.3 - 0.6), p<0.001 | 0.5 (0.3 - 0.7), p<0.001   |
| Ethnicity Black                       | 2.1 (1.5 - 3.2), p<0.001     | 0.5 (0.3 - 1), p<0.05    | ns, p= 0.841               |
| Smoking Current or Ex                 | 0 (0 - 0), p<0.001           | 0.1 (0.1 - 0.2), p<0.001 | 0.1 (0.1 - 0.1), p<0.001   |
| Body Mass Index                       | 1 (0.9 - 1), p<0.01          | 1 (1 - 1), ns, p= 0.12   | 1 (1 - 1), p<0.05          |
| Prior emergency admissions (1year)    | 1.2 (1.1 - 1.3), p<0.001     | 1.3 (1.2 - 1.4), p<0.001 | 1.3 (1.2 - 1.4), p<0.001   |
| Palliative care registered            | 9.5 (6.8 - 13.2), p<0.001    | 5.9 (4.2 - 8.4), p<0.001 | 5.9 (4.7 - 7.5), p<0.001   |
| Nursing home resident                 | ns, p= 0.547                 | ns, p= 0.634             | 3.5 (2.7 - 4.6), p<0.001   |
| Co-morbidities ≥3                     | 3 (2 - 4.4), p<0.001         | 2.3 (1.6 - 3.3), p<0.001 | 1.7 (1.3 - 2.3), p<0.001   |
| Peripheral vascular disease           | 2.6 (1.8 - 3.9), p<0.001     | 1.9 (1.3 - 2.9), p<0.01  | ns, p= 0.232               |
| Chronic obstructive pulmonary disease | 2.1 (1.4 - 3), p<0.001       | 3.8 (2.8 - 5.2), p<0.001 | 2.2 (1.7 - 2.9), p<0.001   |
| Cardiac failure                       | 2 (1.5 - 2.8), p<0.001       | 1.7 (1.2 - 2.3), p<0.01  | 1.8 (1.4 - 2.3), p<0.001   |
| Chronic kidney disease                | 1.6 (1.2 - 2.1), p<0.01      | ns, p= 0.095             | ns, p= 0.328               |
| Diabetes                              | 1.4 (1.1 - 1.9), p<0.05      | ns, p= 0.465             | ns, p= 0.426               |
| Atrial fibrillation                   | 1.4 (1 - 1.9), p<0.05        | 1.9 (1.4 - 2.6), p<0.001 | ns, p= 0.602               |
| Cancer                                | ns, p= 0.338                 | 1.5 (1.1 - 2), p<0.01    | 2.1 (1.7 - 2.6), p<0.001   |
| Dementia                              | ns, p= 0.878                 | ns, p= 0.505             | 2 (1.5 - 2.6), p<0.001     |
| Asthma                                | ns, p= 0.337                 | 0.7 (0.5 - 1), p<0.05    | ns, p= 0.376               |

1 Male gender was significantly positively associated with mortality in all 3 categories. Increasing age was a significant  
2 factor, but there was no significant difference in age quintile distribution ( $\chi^2=12.168$ ,  $p=0.144$ , ns) with 89%, 84%  
3 and 86% in the oldest quintile in the CHD, NCHD and DIC groups respectively. For deprivation, for CHD and NCHD  
4 the pattern mirrored that of hospital admission with significantly increased mortality rates in the lesser deprived  
5 quintiles but not in the highest quintile whereas in DIC, a significant effect showing an increased mortality rate was  
6 only seen in the most deprived quintile. All categories shared a propensity for greater prior emergency admissions,  
7 multi morbidity and being in a palliative phase of care whilst being nursing home residency was associated with  
8 death in the community rather than hospital death. Individual morbidities varied in their associations, noting that  
9 diabetes and chronic kidney disease were in increased association with mortality only in the CHD group. The Black  
10 ethnic minority had significantly higher, and the South Asian significantly lower COVID hospital mortality rate,  
11 proportionately mirroring admission rates. Directly comparing CHD to NCHD confirmed a significantly increased  
12 association with Black ethnicity (OR 4.6 (2 - 10.2),  $p<0.003$ ), diabetes (OR 1.5 (1 - 2.3),  $p<0.005$ ) and chronic kidney  
13 disease (OR 1.6 (1.1 - 2.3),  $p<0.004$ ) and an even greater negative association with current or previous smoking (OR  
14 0.1 (0 - 0.3),  $p<0.002$ ).

### 25 **Absolute risk of COVID Death by Ethnic group**

26 Specifically for COVID death, Table 2 shows numbers, percentages, absolute risk and excess risk with unadjusted ORs  
27 for the ethnic minorities compared to the White group and Figure 2a shows the distribution of mortality outcome by  
28 ethnic category ( $\chi^2 = 126.1$ ,  $p<0.001$ ). The absolute risk of COVID death was 1.32, 0.73 and 2.2 per 1000 population  
29 in the White, South Asian and Black ethnic groups and the excess risk was -0.61 (negative) and 0.85 deaths per 1000  
30 population in South Asians and Blacks versus Whites respectively. Compared to the White population, the  
31 unadjusted OR (95% CI) for COVID death for the Black and Asian groups was 1.6 (1.2 – 2.3) and 0.5 (0.4 – 0.8)  
32 respectively (both  $p<0.01$ ). The ethnic groups differed significantly in age (White  $50\pm 20$ , South Asian  $45\pm 16$ , Black  
33  $45\pm 17$  years,  $F=1868.9$ ,  $P<0.001$ ) and age was the dominant factor associated with hospital admission and death  
34 (Tables 1, 3, 4, 5). To avoid any potential misrepresentation of mortality outcomes by statistical age adjustment, the  
35 absolute effects were considered for the oldest quintile only where 84% of all COVID deaths occurred, in which case  
36 the ORs were Black 3.9 (2.7 – 5.6) ( $p<0.001$ ) and South Asian 0.9 (0.6 – 1.4) ( $p=0.72$ , ns) (Figure 2b).

### 47 **COVID Hospital admission and COVID mortality**

48 By introducing hospital admission status, the COVID mortality ORs were Black 1.3 (0.9 – 2.0) ( $p=0.206$ , ns) and South  
49 Asian 1.5 (0.9 – 2.3) ( $p=0.098$ , ns) were similar, indicating similar in hospital mortality in contrast to the whole  
50 population effect. To negate this potential effect of prior propensity for acquisition of serious COVID infection, and  
51 focusing on the Black and South Asian minorities compared to the White majority, a narrower assessment of those  
52 who were admitted with COVID and had a COVID death was made. Amongst 930 COVID admissions, excluding those  
53 with a COVID admission but with non-COVID death ( $n = 83$  (9%)), COVID death occurred 270 (32%) (White 189, South  
54 Asian 32, Black 38, Other 11). The ORs for the association of ethnicity with COVID mortality were Black 1.2 (0.7 – 1.8)



( $p=0.423$ , ns) and South Asian 1.6 (1.0 – 2.5) ( $p=0.075$ , ns) ( $\chi^2=5.92$ ,  $p=0.115$ , ns) (Figure 2c). Utilising the full model with all independent variables, including age, which remained significantly different between ethnic groups ( $F=13.23$ ,  $p<0.001$ ), then the significantly associated variables were age, gender, smoking status, body mass index, palliative phase of life, multi-morbidity and the individual comorbidities of cardiac failure, chronic kidney disease and peripheral vascular disease but not ethnic grouping or deprivation score (Table 6).

**Table 6**

Multinomial regression amongst those with a COVID admission restricted to the White, Black and South Asian ethnic groups ( $n=797$ ) comparing to those with COVID death ( $n=259$ ) to those who were alive at 12 weeks. Results are the Odds Ratio with 95% confidence intervals. Variables not listed from Table 1 were excluded stepwise (backwards) as not significant.

| Table 6                              | OR COVID death vs alive        |
|--------------------------------------|--------------------------------|
| Age                                  | 1.05 (1.03 - 1.07), $p<0.001$  |
| Gender (male)                        | 1.91 (1.3 - 2.83), $p<0.01$    |
| Smoking Current or Ex                | 0.01 (0 - 0.04), $p<0.001$     |
| Body Mass Index (kg/m <sup>2</sup> ) | 0.92 (0.86 - 0.98), $p<0.01$   |
| Palliative care registered           | 7.83 (4.21 - 14.56), $p<0.001$ |
| Co-morbidities $\geq 3$              | 1.64 (1 - 2.67), $p<0.05$      |
| Cardiac failure                      | 1.82 (1.14 - 2.92), $p<0.05$   |
| Chronic kidney disease               | 1.69 (1.09 - 2.63), $p<0.05$   |
| Peripheral vascular disease          | 2.27 (1.12 - 4.59), $p<0.05$   |

Finally, Table 2 shows the absolute risks of COVID death in COVID hospital admission and ORs which are consistent with the findings of the modelled data.

## Discussion

### Principal findings:

Over and above known general associations with hospital admission and mortality, our study suggest a complex association of deprivation and points to heterogeneity of the impact of ethnicity, both of which may vary by locality. We highlight the need for local health economies to have robust, accurate and integrated clinical data in order to assess and inform local decisions making and, in particular, at a time of heightened anxiety, we raises a concern about the conveyance of risk to local communities. The crucial differences in relationship to other studies are as follows:

### General Associations

Uncontroversially, factors associated with non-COVID or COVID hospital admission and death included age, gender, prior emergency admissions, and palliative phase of life, nursing home residence and multi-morbidity with specific comorbidities associated with COVID admission or death and with ethnic status. Within the limitations of our study, we have found smokers as an under-represented group in COVID-19 admission and mortality. Although a number of hypotheses and have been proposed to account for a possible protective effect, this remains an area under further evaluation.<sup>18</sup> It is suggested that any association of smoking with better COVID outcomes, observed in some other studies,<sup>2,19</sup> may be questioned when taken in the context of this being common to non-COVID admissions and death during this period.

### COVID vs Non COVID Admissions

The significant differences were age, gender and degree of comorbidity complexity (palliative care, nursing home) but as it is likely that patterns of emergency admissions differed at this time, comparisons of COVID to non-COVID hospital admission may have little relevance to COVID outcomes, noteworthy for studies that have reported on COVID hospital admission alone.<sup>12,13,20</sup>

### Deprivation

For hospital non-COVID and COVID admission and death, the pattern was for excess in lesser deprived quintiles in the White ethnic population but not within ethnic minority groups where deprivation was not a significant factor. This contrasts with other studies:<sup>2,5</sup> in some deprivation was not a significantly associated factor in fully adjusted models,<sup>21</sup> whilst other UK studies,<sup>20</sup> and most overseas studies, have not considered this.<sup>12,13</sup> Following the H1N1 pandemic influenza of 2009, many studies indicated effects of deprivation including a rural urban divide impact,<sup>22</sup> as is seen in this pandemic.<sup>15</sup> Our findings within a health economy (ie based on a local population) with significant deprivation call for the need to explore this association within larger studies specifically within urban areas.

### Ethnicity

We note that a recent meta-analysis shows heterogeneity in the association of ethnicity to COVID mortality.<sup>23</sup> In a large population study reporting adverse odds ratios for all ethnic groups, their crude unadjusted data showed significantly increased risk in the Black ( $\chi^2 = 17.464$ ,  $p < 0.001$ ) but not in the South Asian group ( $\chi^2 = 3.238$ ,  $p = 0.072$ ).<sup>2</sup> This was also shown in another population level study.<sup>15</sup> In the largest reported hospital admission series both ethnic groups had significantly lower unadjusted mortality rates,<sup>17</sup> whilst in their modelled data no effect was seen amongst Blacks. In a study from New York there was no adverse ethnicity signal,<sup>12,13</sup> and early reported adverse ethnicity outcomes in the 2009 UK flu pandemic,<sup>24</sup> did not withstand subsequent review.<sup>25</sup> We find our Black population had significantly higher and the South Asian lower crude and adjusted COVID admission rates compared to Whites, also observing that both ethnic subgroups had lower non-COVID hospital admissions, further contextualising the strong

1 effect in the Black cohort. In both groups, their crude and adjusted patterns of COVID mortality mirrored that of  
2 COVID hospital admission but from the numerical base of COVID admission, there was no significant difference  
3 between the Black and South Asian compared to the White groups, highlighting pitfalls of examining effects in  
4 isolation. Our data in the Black population is broadly in keeping with some studies showing excess COVID  
5 hospitalisation and mortality but the South Asian group's lower absolute and adjusted rate of admission and death  
6 from COVID 19 are strikingly different. Given the variation in findings to date, we do not consider this an  
7 "unexpected finding", and hypothesise that many local population factors are at play including population density,  
8 family size, housing, duration of immigration, country of birth (including UK born) and occupation and the precise  
9 ethnic group within the 'South Asian' population may well be of importance. A recent updated analysis by the UK  
10 Office for National Statistics has emphasised that "*ethnic differences in mortality involving COVID-19 are most*  
11 *strongly associated with demographic and socio-economic factors, such as place of residence and occupational*  
12 *exposures, and cannot be explained by pre-existing health conditions*" which conclusion is consistent with our locally-  
13 dictated findings.<sup>26</sup> Otherwise within BAME groups we find specific individual comorbidities vary in their association  
14 with COVID risks: in South Asians these are diabetes, peripheral vascular disease and atrial fibrillation; in the Black  
15 population hypertension, atrial fibrillation and cardiac failure; in white ethnicity most co-morbidities but in particular  
16 COPD, chronic kidney disease and rheumatoid arthritis.

### 29 **Strengths and Weaknesses.**

31 Combining Wolverhampton's health data evaluated our local population's heterogeneous demographic and its  
32 associations with community or hospital non-COVID and COVID hospital admission and mortality, uniquely  
33 approaching these outcomes simultaneously. This local nuance complements larger studies, informing appraisal of  
34 risk from an urban, and multi-ethnic and deprived setting, highlighting concerns of extrapolation from larger  
35 datasets to UK localities. An example of a particular strength of the data quality was the cross check ascertainment  
36 of COVID admission, without sole reliance on COVID testing, permitting specific categorisation of deaths (COVID,  
37 non-COVID and post discharge) rather than less accurately into global mortality.

38 Limitations of the study: This is a twelve-week evaluation spanning the pandemic's upsurge and peak; the population  
39 and event number were comparatively small; cause of death in the community was unknown and it is likely that  
40 people died away from the hospital undiagnosed with COVID 19. A further weakness of the study is that there was  
41 some missing data but this was very limited in magnitude and only affected 3 variables: BMI, smoking and ethnicity.  
42 We are confident that these were dealt with appropriately; for BMI as described in Methods; for smoking we coded  
43 all unknown smoking as non-smokers on the very likely assumption that the vastly greater majority were non-  
44 smokers, whilst missing ethnicity was coded as "Unknown" and analysed as such. Given the degree of completeness  
45 rather than incompleteness of our data, we consider our approach approximates to a complete case analysis, arising  
46 from significant effort on multisource data accrual, integration and quality. We thus do not feel that multiple  
47 imputation should be applied to replace missing data, since we do not feel this can possibly improve precision. In so  
48 doing, we are thus also avoiding the greater and well-recognized potential to introduce bias from a poorly fitting

1 imputation models.<sup>27</sup> We consider this to be a strength of the paper. One further consideration is that whilst being  
2 aligned to the population at 99.5% concordance, hospital data were not totally drawn from the City population,  
3 which varied by GP registration, residency, or admission from immediately surrounding areas and a small proportion  
4 of admissions were non-resident or non-registered, so this is not strictly an epidemiological study but an  
5 observational study comparing defined cohorts in tiers of analysis (e.g. COVID death amongst COVID admissions)  
6 where this caveat does not apply.<sup>28</sup>  
7  
8  
9  
10

### 11 **Implications for clinicians and policy makers**

12  
13  
14  
15 We show that a variety of recognised factors were associated with COVID death, as with non-COVID death. At our  
16 local level, COVID admission and death were not strongly associated with worsening deprivation, with a novel  
17 potential different relationship in the White population.  
18  
19

20  
21 Higher absolute and adjusted COVID admission and mortality occurred in the Black population whilst they were  
22 reduced in Wolverhampton's South Asian community. We point out the non-significant association between in-  
23 hospital COVID-19 case fatality and ethnicity, raising the probability that COVID-19 mortality relates to differential  
24 risks of exposure, susceptibility and disease contraction before hospital admission, let alone the possible avoidance  
25 of hospital admission. Two important considerations are the potential excessive use of multiple factors and the  
26 disruption of the perspective from a population's base through hospital admissions to COVID specific admission,  
27 leading to widely varying conclusions, highlighting the difficulties of using observational data and the potential for  
28 Collider bias.<sup>29</sup> We support the case for more localised population-based studies of both hospital admission and  
29 subsequent death, such as ours, in which the denominator and numerator populations can be clearly linked and are  
30 fully and transparently ascertained and characterised. To avoid associations in the data being due to the way in  
31 which data are sampled, local health economies should be mandated to link hospital and primary care data across  
32 their population level down to the un-anonymised individual level; they should, in preparation for future epidemics,  
33 have data quality mechanisms in place to ensure accuracy in their demographics, the accrual of important missing  
34 data and the triangulation of key outcomes to minimise false positive and negative results. This includes the need to  
35 have a robust, systematic, accurate and timely approach to the recording of death whether in the community or  
36 hospital setting. A defined data set and its capture in routine clinical systems seems apposite.<sup>30</sup> Accepting that  
37 variation in findings in different population subsets is both inevitable and valid, we would suggest the need for the  
38 public health and research community to accommodate uncertainty in emergent evidence, learning from the  
39 experience of previous viral pandemics. This includes the need to have a robust, systematic, accurate and timely  
40 approach to the recording of death whether in the community or hospital setting.<sup>31</sup>  
41  
42  
43  
44  
45  
46  
47  
48  
49  
50  
51  
52  
53  
54  
55  
56  
57  
58

### 59 **The conveyance of risk**

1 Public health messages are vital to convey but population adjusted risk rates may confuse, adversely impacting  
2 behaviors such that, it is feared, hospital admission patterns may change unfavourably. Absolute, absolute excess,  
3 relative, unadjusted and adjusted risk is complex to communicate even for healthcare professionals making them  
4 susceptible to reasoning errors and misinterpretation of probabilities<sup>32</sup> and individuals, with erstwhile health risk,  
5 should know about the magnitude of risk in a way that can be conceptualised.<sup>33,34</sup> For our Black population, the fully-  
6 modelled OR for COVID mortality was 2.1, the absolute risk 2.2 / 1000 people or an excess risk of 0.9/1000. A Black  
7 person in Wolverhampton ought to be informed that “twice as likely to die of COVID” compared to the White  
8 community can also mean “a 1 in 1000 excess risk”.

### 15 **Future research**

16 Crucially, we therefore argue that in reporting future research of this kind, during the current pandemic and beyond,  
17 there is an ethical obligation for the standardisation of the conveyance of risk in a manner that spans the absolute to  
18 the relative so that is easily comprehensible to the individuals and populations at risk and others, including health  
19 professionals, politicians and the media. These are all matters in which the editorial and peer review mechanism of  
20 our medical journals have a vital role.

21 **Author contributions:** Accountable senior author BMS; Data analysis, manuscript writing: BMS, JB, SJD, AV;  
22 Preparation for submission: SJD, BMS, JB; Database quality, data integration and data quality and integration: AV,  
23 BMS, VK; Reading drafts as lay expert: SM; Statistical advice: AN; All authors contributed intellectual content during  
24 the drafting and revision of the work and approved the final version.

25 **Transparency declaration:** BMS affirms that the manuscript is an honest, accurate, and transparent account of the  
26 study being reported; that no important aspects of the study have been omitted; and that any discrepancies from  
27 the study as planned (and, if relevant, registered) have been explained

28 **Funding:** None

29 **Competing interest statement** All authors have completed the Unified Competing Interest form (available on  
30 request from the corresponding author) and declare: no support from any organisation for the submitted work; no  
31 financial relationships with any organisations that might have an interest in the submitted work in the previous three  
32 years, no other relationships or activities that could appear to have influenced the submitted work.

33 **Data Sharing:** Anonymised data will be shared on reasonable request to the corresponding author

## References

1. Xu B, Kraemer MUG; Open COVID-19 Data Curation Group. Open access epidemiological data from the COVID-19 outbreak. *Lancet Infect Dis*. 2020 May;20(5):534. doi: 10.1016/S1473-3099(20)30119-5
2. Williamson EJ, Walker AJ, Bhaskaran K, *et al*. Factors associated with COVID-19-related death using OpenSAFELY. *Nature*. 2020 Aug;584(7821):430-436. doi: 10.1038/s41586-020-2521-4. Epub 2020 Jul 8.
3. Mehra MR, Ruschitzka F, Patel AN. Retraction-Hydroxychloroquine or chloroquine with or without a macrolide for treatment of COVID-19: a multinational registry analysis. *Lancet*. 2020 Jun 13;395(10240):1820. doi: 10.1016/S0140-6736(20)31324-6. Epub 2020 Jun 5.
4. Rubin EJ, Baden LR, Morrissey S, Campion EW. Medical Journals and the 2019-nCoV Outbreak. *N Engl J Med*. 2020;382(9):866. doi:10.1056/NEJMe2001329
5. Public Health England. Disparities in the risk and outcomes of COVID-19. [https://assets.publishing.service.gov.uk/government/uploads/system/uploads/attachment\\_data/file/892085/disparities\\_review.pdf](https://assets.publishing.service.gov.uk/government/uploads/system/uploads/attachment_data/file/892085/disparities_review.pdf) (Accessed 20-07-20)
6. Office for National Statistics. <https://www.ons.gov.uk/peoplepopulationandcommunity/birthsdeathsandmarriages/deaths> (accessed 20-07-20)
7. Willett K on behalf of NHS England and NHS Improvement . COVID-19 Patient Notification System (CPNS) <https://www.england.nhs.uk/coronavirus/wp-content/uploads/sites/52/2020/04/C0389-update-to-cpns-reporting-letter-27-april-2020.pdf> (accessed 20-07-20)
8. Woloshin S, Patel N, Kesselheim AS. False Negative Tests for SARS-CoV-2 Infection - Challenges and Implications. *N Engl J Med*. 2020 Aug 6;383(6):e38. doi:10.1056/NEJMp2015897. Epub 2020 Jun 5.
9. Bradley SH, Lawrence NR, Carder P. Using primary care data for health research in England - an overview. *Future Healthc J*. 2018 Oct;5(3):207-212. doi: 10.7861/futurehosp.5-3-207.
10. Zhou F, Yu T, Du R, *et al*. Clinical course and risk factors for mortality of adult inpatients with COVID-19 in Wuhan, China: a retrospective cohort study [published correction appears in *Lancet*. 2020 Mar 28;395(10229):1038] [published correction appears in *Lancet*. 2020 Mar 28;395(10229):1038]. *Lancet*. 2020;395(10229):1054-1062. doi:10.1016/S0140-6736(20)30566-3
11. Goyal P, Choi JJ, Pinheiro LC, *et al*. Clinical Characteristics of COVID-19 in New York City. *N Engl J Med*. 2020;382(24):2372-2374. doi:10.1056/NEJMc2010419
12. Argenziano MG, Bruce SL, Slater CL, *et al*. Characterization and clinical course of 1000 patients with coronavirus disease 2019 in New York: retrospective case series. *BMJ*. 2020 May 29;369:m1996. doi: 10.1136/bmj.m1996.
13. Petrilli CM, Jones SA, Yang J, *et al*. Factors associated with hospital admission and critical illness among 5279 people with coronavirus disease 2019 in New York City: prospective cohort study. *BMJ*. 2020;369:m1966. Published 2020 May 22. doi:10.1136/bmj.m1966



14. Gianfrancesco M, Hyrich KL, Al-Adely S, *et al*. Characteristics associated with hospitalisation for COVID-19 in people with rheumatic disease: data from the COVID-19 Global Rheumatology Alliance physician-reported registry. *Ann Rheum Dis*. 2020;79(7):859-866. doi:10.1136/annrheumdis-2020-217871
15. de Lusignan S, Dorward J, Correa A, *et al*. Risk factors for SARS-CoV-2 among patients in the Oxford Royal College of General Practitioners Research and Surveillance Centre primary care network: a cross-sectional study. *Lancet Infect Dis*. 2020 Sep;20(9):1034-1042. doi: 10.1016/S1473-3099(20)30371-6. Epub 2020 May 15.
16. Izcovich A, Ragusa MA, Tortosa F, *et al*. Prognostic factors for severity and mortality in patients infected with COVID-19: A systematic review. *PLoS One* 2020;15. doi:10.1371/journal.pone.0241955
17. Harrison, EM, Docherty AB, Barr B, *et al*. Ethnicity and Outcomes from COVID-19: The ISARIC CCP-UK Prospective Observational Cohort Study of Hospitalised Patients (5/31/2020). Preprint available at SSRN: <https://ssrn.com/abstract=3618215> or <http://dx.doi.org/10.2139/ssrn.3618215>
18. Usman MS, Siddiqi TJ, Khan MS, *et al*. Is there a smoker's paradox in COVID-19? *BMJ Evid Based Med*. 2020 Aug 11;bmjebm-2020-111492. doi: 10.1136/bmjebm-2020-111492. Epub ahead of print.
19. Farsalinos K, Barbouni A, Niaura R. Systematic review of the prevalence of current smoking among hospitalized COVID-19 patients in China: could nicotine be a therapeutic option? *Intern Emerg Med*. 2020 Aug;15(5):845-852. doi: 10.1007/s11739-020-02355-7. Epub 2020 May 9.
20. Docherty AB, Harrison EM, Green CA, *et al*. Features of 20 133 UK patients in hospital with COVID-19 using the ISARIC WHO Clinical Characterisation Protocol: prospective observational cohort study. *BMJ*. 2020;369:m1985. Published 2020 May 22. doi:10.1136/bmj.m1985
21. Niedzwiedz CL, O'Donnell CA, Jani BD, *et al*. Ethnic and socioeconomic differences in SARS-CoV-2 infection: prospective cohort study using UK Biobank. *BMC Med*. 2020;18(1):160. Published 2020 May 29. doi:10.1186/s12916-020-01640-8
22. Rutter PD, Mytton OT, Mak M, Donaldson LJ. Socio-economic disparities in mortality due to pandemic influenza in England. *Int J Public Health*. 2012;57(4):745-750. doi:10.1007/s00038-012-0337-1
23. Pan D, Sze S, Minhas JS, *et al*. The impact of ethnicity on clinical outcomes in COVID-19: A systematic review. *EClinicalMedicine*. 2020;23:100404. Published 2020 Jun 3. doi:10.1016/j.eclinm.2020.100404
24. Nguyen-Van-Tam JS, Openshaw PJ, Hashim A, *et al*. Risk factors for hospitalisation and poor outcome with pandemic A/H1N1 influenza: United Kingdom first wave (May-September 2009). *Thorax*. 2010;65(7):645-651. doi:10.1136/thx.2010.135210
25. Nyland GA, McKenzie BC, Myles PR, *et al*. Effect of ethnicity on care pathway and outcomes in patients hospitalized with influenza A(H1N1)pdm09 in the UK. *Epidemiol Infect*. 2015;143(6):1129-1138. doi:10.1017/S0950268814001873
26. Office for National Statistics  
<https://www.ons.gov.uk/peoplepopulationandcommunity/birthsdeathsandmarriages/deaths/articles/updati-ngethniccontrastsindeathsinvolvingthecoronaviruscovid19englandandwales/deathsoccurring2marchto28july2020#main-points> (accessed 22/10/20)

- 1 27. Lee KJ, Carlin JB. Recovery of information from multiple imputation: a simulation study *Emerg Themes*  
2 *Epidemiol.* 2012; 9: 3. Published online 2012 Jun 13. doi: 10.1186/1742-7622-9-3
- 3  
4 28. Pearce N. Classification of epidemiological study designs. *Int J Epidemiol.* 2012;41(2):393-397.  
5  
6 doi:10.1093/ije/dys049
- 7  
8 29. Griffith GJ, Morris TT, Tudball MJ, *et al.* Collider bias undermines our understanding of COVID-19 disease risk  
9 and severity. *Nat Commun.* 2020 Nov 12;11(1):5749. doi: 10.1038/s41467-020-19478-2.
- 10  
11 30. Cross M. Show us the data: why clinical outcomes matter. *BMJ.* 2012;344:e66. Published 2012 Jan 10.  
12  
13 doi:10.1136/bmj.e66
- 14  
15 31. Luce T. COVID 19: death certification in England and Wales. *BMJ.* 2020;369:m1571. Published 2020 Apr 21.  
16  
17 doi:10.1136/bmj.m1571
- 18  
19 32. Grant RL. Converting an odds ratio to a range of plausible relative risks for better communication of research  
20 findings [published correction appears in *BMJ.* 2014;348:g2124]. *BMJ.* 2014;348:f7450. Published 2014 Jan  
21  
22 24. doi:10.1136/bmj.f7450
- 23  
24 33. Paling J. Strategies to help patients understand risks. *BMJ.* 2003;327(7417):745-748.  
25  
26 doi:10.1136/bmj.327.7417.745
- 27  
28 34. Ahmed H, Naik G, Willoughby H, Edwards AG. Communicating risk. *BMJ.* 2012;344:e3996. Published 2012  
29  
30 Jun 18. doi:10.1136/bmj.e3996
- 31  
32  
33  
34  
35  
36  
37  
38  
39  
40  
41  
42  
43  
44  
45  
46  
47  
48  
49  
50  
51  
52  
53  
54  
55  
56  
57  
58  
59  
60



1 **Figure Legends:**  
2  
3  
4

5 **Figure 1: Age and deprivation in relation to hospital admission and in whole population**  
6  
7

8 The association of age (**a.**) and deprivation (**b.**) with hospital admission type. Figure 1**c.** shows the inter-relationship  
9 of age, deprivation and ethnicity in the whole population (n=228,632) (Other / Unknown ethnic groups not shown).  
10  
11  
12  
13  
14

15 **Figure 2: Mortality by ethnicity**  
16  
17

18 Crude mortality by ethnic grouping as percentages (**a.**  $\chi^2=184.4$ ,  $p<0.001$ ), within the oldest quintile (**b.**  $\chi^2=92.2$ ,  
19  $p<0.001$ ) or restricted to those with a COVID admission excluding those with a non-COVID death (**c.**  $\chi^2=5.92$ ,  
20  $p=0.115$ , ns), (Other / Unknown ethnic categories are not shown but were included in the analysis).  
21  
22  
23  
24  
25  
26  
27  
28  
29  
30  
31  
32  
33  
34  
35  
36  
37  
38  
39  
40  
41  
42  
43  
44  
45  
46  
47  
48  
49  
50  
51  
52  
53  
54  
55  
56  
57  
58  
59  
60

a.

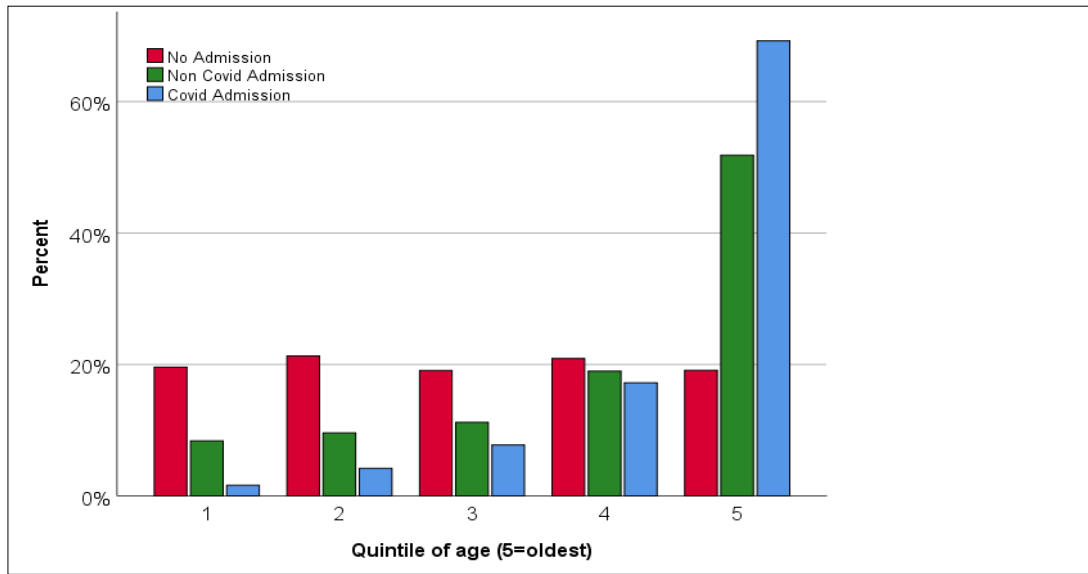

b.

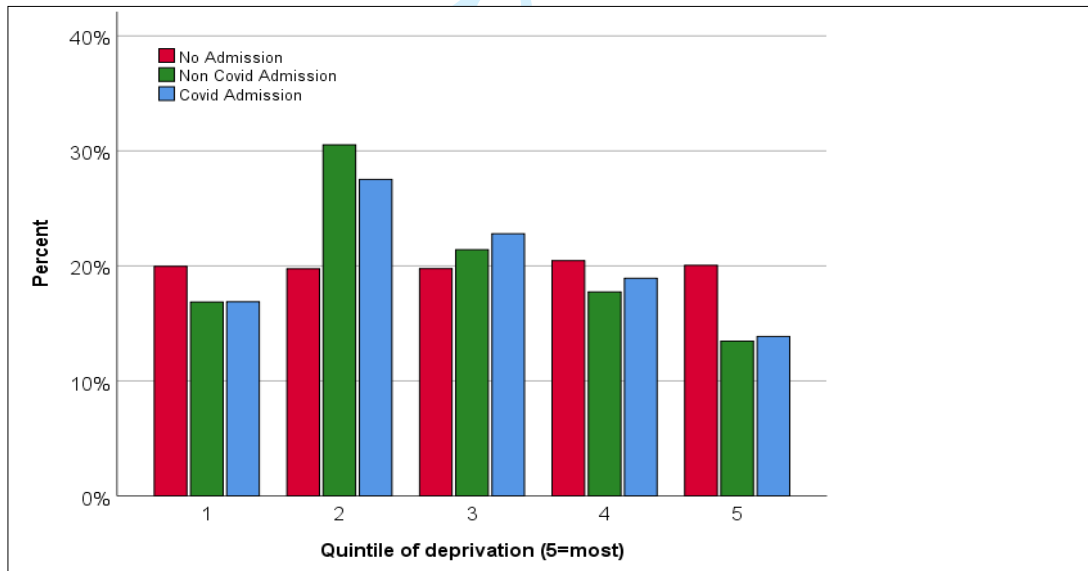

c.

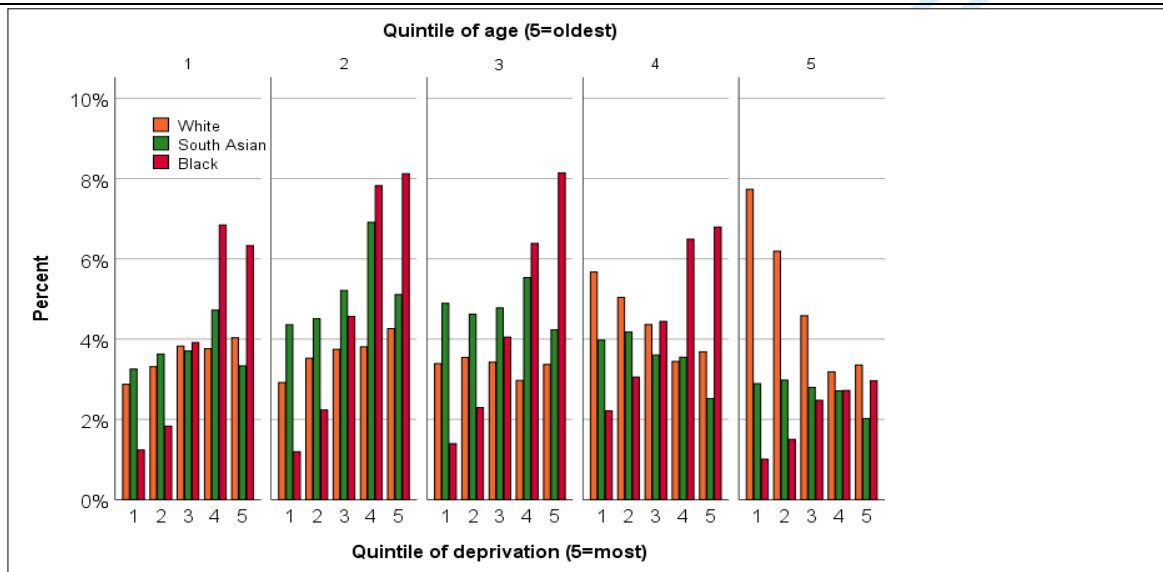

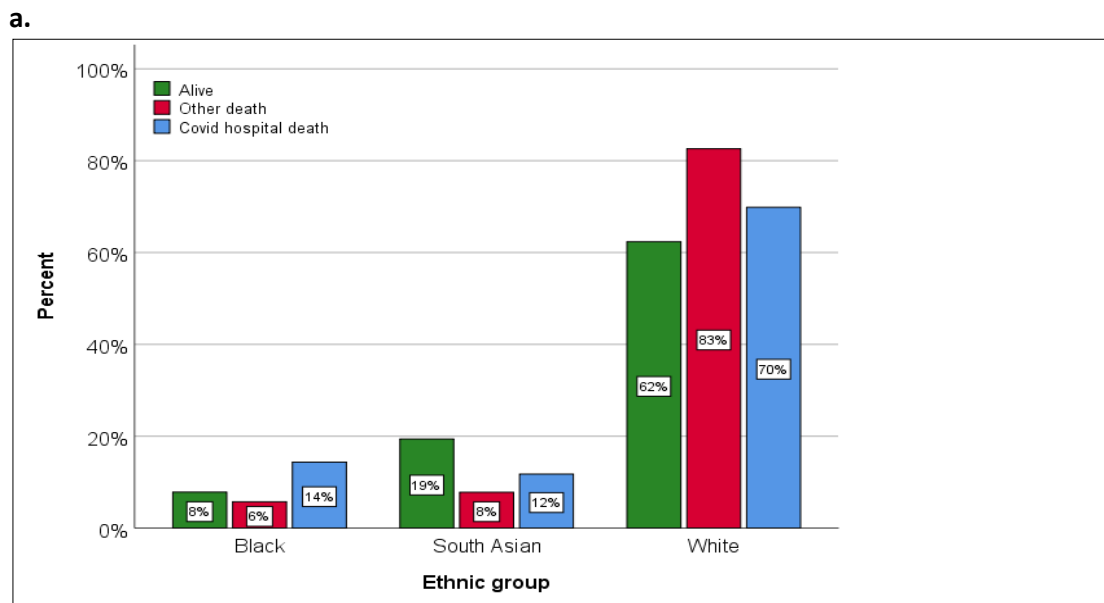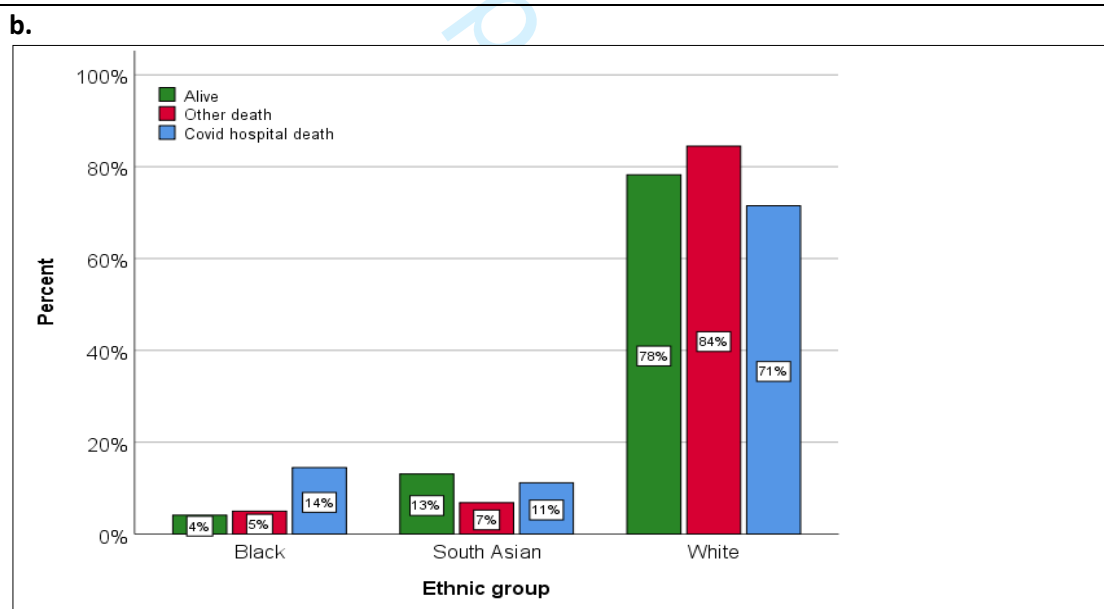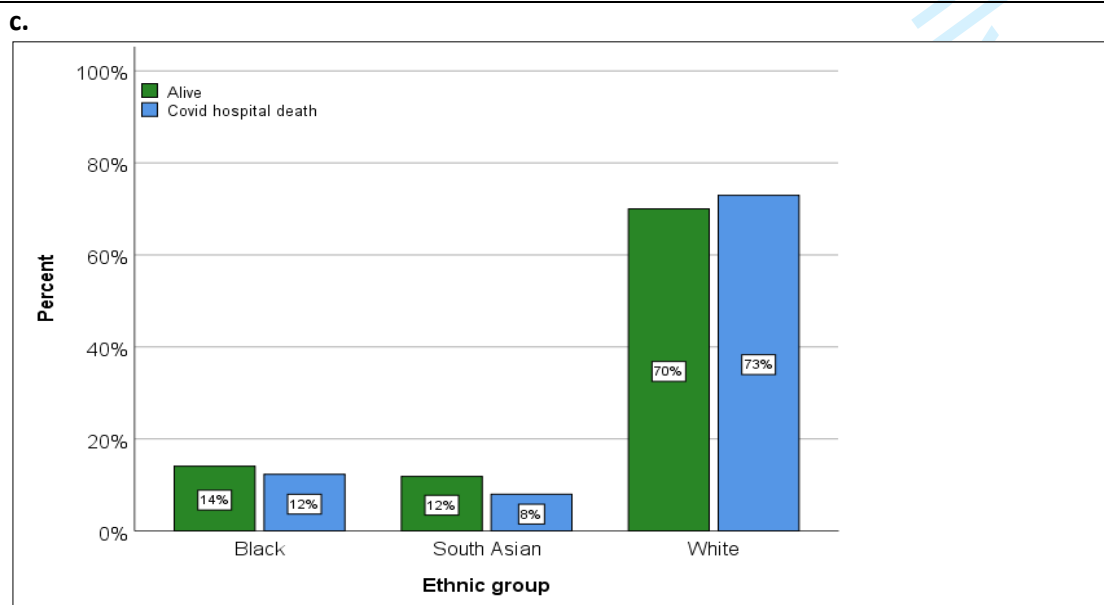

## STROBE Statement—checklist of items that should be included in reports of observational studies

|                              | Item No | Recommendation                                                                                                                                                                                                                                                                                                                                                                                                                                                         | Page No |
|------------------------------|---------|------------------------------------------------------------------------------------------------------------------------------------------------------------------------------------------------------------------------------------------------------------------------------------------------------------------------------------------------------------------------------------------------------------------------------------------------------------------------|---------|
| <b>Title and abstract</b>    | 1       | (a) Indicate the study's design with a commonly used term in the title or the abstract                                                                                                                                                                                                                                                                                                                                                                                 | 1       |
|                              |         | (b) Provide in the abstract an informative and balanced summary of what was done and what was found                                                                                                                                                                                                                                                                                                                                                                    | 3       |
| <b>Introduction</b>          |         |                                                                                                                                                                                                                                                                                                                                                                                                                                                                        |         |
| Background/rationale         | 2       | Explain the scientific background and rationale for the investigation being reported                                                                                                                                                                                                                                                                                                                                                                                   | 5       |
| Objectives                   | 3       | State specific objectives, including any prespecified hypotheses                                                                                                                                                                                                                                                                                                                                                                                                       | 5       |
| <b>Methods</b>               |         |                                                                                                                                                                                                                                                                                                                                                                                                                                                                        |         |
| Study design                 | 4       | Present key elements of study design early in the paper                                                                                                                                                                                                                                                                                                                                                                                                                | 5-6     |
| Setting                      | 5       | Describe the setting, locations, and relevant dates, including periods of recruitment, exposure, follow-up, and data collection                                                                                                                                                                                                                                                                                                                                        | 5-6     |
| Participants                 | 6       | (a) <i>Cohort study</i> —Give the eligibility criteria, and the sources and methods of selection of participants. Describe methods of follow-up<br><i>Case-control study</i> —Give the eligibility criteria, and the sources and methods of case ascertainment and control selection. Give the rationale for the choice of cases and controls<br><i>Cross-sectional study</i> —Give the eligibility criteria, and the sources and methods of selection of participants | n/a     |
|                              |         | (b) <i>Cohort study</i> —For matched studies, give matching criteria and number of exposed and unexposed<br><i>Case-control study</i> —For matched studies, give matching criteria and the number of controls per case                                                                                                                                                                                                                                                 | n/a     |
| Variables                    | 7       | Clearly define all outcomes, exposures, predictors, potential confounders, and effect modifiers. Give diagnostic criteria, if applicable                                                                                                                                                                                                                                                                                                                               | 5       |
| Data sources/<br>measurement | 8*      | For each variable of interest, give sources of data and details of methods of assessment (measurement). Describe comparability of assessment methods if there is more than one group                                                                                                                                                                                                                                                                                   | 5       |
| Bias                         | 9       | Describe any efforts to address potential sources of bias                                                                                                                                                                                                                                                                                                                                                                                                              | 5       |
| Study size                   | 10      | Explain how the study size was arrived at                                                                                                                                                                                                                                                                                                                                                                                                                              | 5       |
| Quantitative variables       | 11      | Explain how quantitative variables were handled in the analyses. If applicable, describe which groupings were chosen and why                                                                                                                                                                                                                                                                                                                                           | 6       |
| Statistical methods          | 12      | (a) Describe all statistical methods, including those used to control for confounding                                                                                                                                                                                                                                                                                                                                                                                  | 6       |
|                              |         | (b) Describe any methods used to examine subgroups and interactions                                                                                                                                                                                                                                                                                                                                                                                                    | 6-9     |
|                              |         | (c) Explain how missing data were addressed                                                                                                                                                                                                                                                                                                                                                                                                                            | 5-6     |
|                              |         | (d) <i>Cohort study</i> —If applicable, explain how loss to follow-up was addressed<br><i>Case-control study</i> —If applicable, explain how matching of cases and controls was addressed<br><i>Cross-sectional study</i> —If applicable, describe analytical methods taking account of sampling strategy                                                                                                                                                              | n/a     |
|                              |         | (e) Describe any sensitivity analyses                                                                                                                                                                                                                                                                                                                                                                                                                                  | n/a     |

Continued on next page

| <b>Results</b>           |     |                                                                                                                                                                                                              |        |
|--------------------------|-----|--------------------------------------------------------------------------------------------------------------------------------------------------------------------------------------------------------------|--------|
| Participants             | 13* | (a) Report numbers of individuals at each stage of study—eg numbers potentially eligible, examined for eligibility, confirmed eligible, included in the study, completing follow-up, and analysed            | 5      |
|                          |     | (b) Give reasons for non-participation at each stage                                                                                                                                                         | n/a    |
|                          |     | (c) Consider use of a flow diagram                                                                                                                                                                           | n/a    |
| Descriptive data         | 14* | (a) Give characteristics of study participants (eg demographic, clinical, social) and information on exposures and potential confounders                                                                     | tables |
|                          |     | (b) Indicate number of participants with missing data for each variable of interest                                                                                                                          | tables |
|                          |     | (c) <i>Cohort study</i> —Summarise follow-up time (eg, average and total amount)                                                                                                                             | n/a    |
| Outcome data             | 15* | <i>Cohort study</i> —Report numbers of outcome events or summary measures over time                                                                                                                          | n/a    |
|                          |     | <i>Case-control study</i> —Report numbers in each exposure category, or summary measures of exposure                                                                                                         | n/a    |
|                          |     | <i>Cross-sectional study</i> —Report numbers of outcome events or summary measures                                                                                                                           | n/a    |
| Main results             | 16  | (a) Give unadjusted estimates and, if applicable, confounder-adjusted estimates and their precision (eg, 95% confidence interval). Make clear which confounders were adjusted for and why they were included | 6-9    |
|                          |     | (b) Report category boundaries when continuous variables were categorized                                                                                                                                    | 6-9    |
|                          |     | (c) If relevant, consider translating estimates of relative risk into absolute risk for a meaningful time period                                                                                             | 6-9    |
| Other analyses           | 17  | Report other analyses done—eg analyses of subgroups and interactions, and sensitivity analyses                                                                                                               | 6-9    |
| <b>Discussion</b>        |     |                                                                                                                                                                                                              |        |
| Key results              | 18  | Summarise key results with reference to study objectives                                                                                                                                                     | 9      |
| Limitations              | 19  | Discuss limitations of the study, taking into account sources of potential bias or imprecision. Discuss both direction and magnitude of any potential bias                                                   | 11     |
| Interpretation           | 20  | Give a cautious overall interpretation of results considering objectives, limitations, multiplicity of analyses, results from similar studies, and other relevant evidence                                   | 9-11   |
| Generalisability         | 21  | Discuss the generalisability (external validity) of the study results                                                                                                                                        | 11     |
| <b>Other information</b> |     |                                                                                                                                                                                                              |        |
| Funding                  | 22  | Give the source of funding and the role of the funders for the present study and, if applicable, for the original study on which the present article is based                                                | 12     |

\*Give information separately for cases and controls in case-control studies and, if applicable, for exposed and unexposed groups in cohort and cross-sectional studies.

**Note:** An Explanation and Elaboration article discusses each checklist item and gives methodological background and published examples of transparent reporting. The STROBE checklist is best used in conjunction with this article (freely available on the Web sites of PLoS Medicine at <http://www.plosmedicine.org/>, Annals of Internal Medicine at <http://www.annals.org/>, and Epidemiology at <http://www.epidem.com/>). Information on the STROBE Initiative is available at [www.strobe-statement.org](http://www.strobe-statement.org).

# BMJ Open

**The risk of COVID hospital admission and COVID mortality during the first COVID 19 wave with a special emphasis on Ethnic Minorities: an observational study of a single, deprived, multi ethnic UK health economy.**

|                                 |                                                                                                                                                                                                                                                                                                                                                                                                                                                                                                                                                                                                                                                                                                                                      |
|---------------------------------|--------------------------------------------------------------------------------------------------------------------------------------------------------------------------------------------------------------------------------------------------------------------------------------------------------------------------------------------------------------------------------------------------------------------------------------------------------------------------------------------------------------------------------------------------------------------------------------------------------------------------------------------------------------------------------------------------------------------------------------|
| Journal:                        | <i>BMJ Open</i>                                                                                                                                                                                                                                                                                                                                                                                                                                                                                                                                                                                                                                                                                                                      |
| Manuscript ID                   | bmjopen-2020-046556.R2                                                                                                                                                                                                                                                                                                                                                                                                                                                                                                                                                                                                                                                                                                               |
| Article Type:                   | Original research                                                                                                                                                                                                                                                                                                                                                                                                                                                                                                                                                                                                                                                                                                                    |
| Date Submitted by the Author:   | 20-Jan-2021                                                                                                                                                                                                                                                                                                                                                                                                                                                                                                                                                                                                                                                                                                                          |
| Complete List of Authors:       | Singh, Baldev; Royal Wolverhampton Hospitals NHS Trust, New Cross Hospital; University of Wolverhampton, School of Medicine & Clinical Practice<br>Bateman, James; Royal Wolverhampton Hospitals NHS Trust, New Cross Hospital<br>Viswanath, Ananth; Royal Wolverhampton Hospitals NHS Trust, New Cross Hospital<br>Klaire, Vijay; Royal Wolverhampton Hospitals NHS Trust, New Cross Hospital<br>Mahmud, Sultan; Royal Wolverhampton Hospitals NHS Trust, New Cross Hospital; Birmingham City University, Faculty of Health, Education & Life Sciences<br>Nevill, Alan; University of Wolverhampton, Faculty of Education Health & Wellbeing<br>Dunmore, Simon; University of Wolverhampton, School of Medicine & Clinical Practice |
| <b>Primary Subject Heading</b>: | Infectious diseases                                                                                                                                                                                                                                                                                                                                                                                                                                                                                                                                                                                                                                                                                                                  |
| Secondary Subject Heading:      | Public health, Epidemiology                                                                                                                                                                                                                                                                                                                                                                                                                                                                                                                                                                                                                                                                                                          |
| Keywords:                       | EPIDEMIOLOGY, PUBLIC HEALTH, COVID-19                                                                                                                                                                                                                                                                                                                                                                                                                                                                                                                                                                                                                                                                                                |
|                                 |                                                                                                                                                                                                                                                                                                                                                                                                                                                                                                                                                                                                                                                                                                                                      |

SCHOLARONE™  
Manuscripts



I, the Submitting Author has the right to grant and does grant on behalf of all authors of the Work (as defined in the below author licence), an exclusive licence and/or a non-exclusive licence for contributions from authors who are: i) UK Crown employees; ii) where BMJ has agreed a CC-BY licence shall apply, and/or iii) in accordance with the terms applicable for US Federal Government officers or employees acting as part of their official duties; on a worldwide, perpetual, irrevocable, royalty-free basis to BMJ Publishing Group Ltd ("BMJ") its licensees and where the relevant Journal is co-owned by BMJ to the co-owners of the Journal, to publish the Work in this journal and any other BMJ products and to exploit all rights, as set out in our [licence](#).

The Submitting Author accepts and understands that any supply made under these terms is made by BMJ to the Submitting Author unless you are acting as an employee on behalf of your employer or a postgraduate student of an affiliated institution which is paying any applicable article publishing charge ("APC") for Open Access articles. Where the Submitting Author wishes to make the Work available on an Open Access basis (and intends to pay the relevant APC), the terms of reuse of such Open Access shall be governed by a Creative Commons licence – details of these licences and which [Creative Commons](#) licence will apply to this Work are set out in our licence referred to above.

Other than as permitted in any relevant BMJ Author's Self Archiving Policies, I confirm this Work has not been accepted for publication elsewhere, is not being considered for publication elsewhere and does not duplicate material already published. I confirm all authors consent to publication of this Work and authorise the granting of this licence.

1 **Title**

2  
3  
4  
5  
6  
7 The risk of COVID hospital admission and COVID mortality during the first COVID 19 wave with a special emphasis on  
8 Ethnic Minorities: an observational study of a single, deprived, multi ethnic UK health economy.  
9

10  
11  
12  
13  
14 **Authors**

15  
16  
17 Baldev M SINGH, James BATEMAN (0000-0003-1952-2821), Ananth VISWANATH, Vijay KLAIRE, Sultan MAHMUD,  
18 Alan M NEVILL (0000-0003-0506-3652), Simon J DUNMORE (0000-0001-7227-5597)  
19  
20  
21  
22  
23

24 **Addresses, positions**

25  
26  
27 The Royal Wolverhampton NHS Trust, New Cross Hospital, Wolverhampton, WV10 0QP, UK; Professor  
28 Baldev M Singh, Consultant; Dr James Bateman, Consultant; Dr Ananth Viswanath, Consultant; Professor  
29 Sultan Mahmud, Director of Innovation, Integration and Research; Vijay Klaire, Integrated Care Business  
30 Intelligence Lead  
31  
32  
33

34  
35 School of Medicine and Clinical Practice, Faculty of Science and Engineering, University of Wolverhampton,  
36 Wolverhampton, WV1 1LY, UK; Dr Simon J Dunmore, Reader; Professor Baldev M Singh, Medical Director  
37  
38

39 Faculty of Health, Education & Life Sciences, Birmingham City University, Birmingham, B15 3TN; Professor  
40 Sultan Mahmud, Professor  
41  
42  
43

44 Faculty of Education Health & Wellbeing, University of Wolverhampton, Walsall Campus, Walsall, WS1 3BD,  
45 UK; Professor Alan M Nevill, Professor  
46  
47  
48  
49  
50

51 **Key words:** Hospital; admission; mortality, COVID-19; ethnicity; deprivation; co-morbidity  
52  
53  
54  
55  
56  
57  
58  
59  
60



1 **Corresponding Author & Guarantor:**  
2  
3

4 Professor Baldev M SINGH, The Royal Wolverhampton NHS Trust, New Cross Hospital, Wolverhampton, WV10 0QP,  
5 UK & School of Medicine and Clinical Practice, Faculty of Science and Engineering, University of Wolverhampton,  
6 Wolverhampton, WV1 1LY, UK; email: [baldev.singh@nhs.net](mailto:baldev.singh@nhs.net)  
7  
8  
9

10 **Copyright:** The Corresponding Author has the right to grant on behalf of all authors and does grant on behalf of all  
11 authors, an exclusive licence on a worldwide basis to the BMJ Publishing Group Ltd to permit this article (if accepted)  
12 to be published in BMJ editions and any other BMJ PGL products and sublicences such use and exploit all subsidiary  
13 rights, as set out in our licence  
14  
15  
16  
17  
18  
19  
20  
21  
22  
23  
24  
25  
26  
27  
28  
29  
30  
31  
32  
33  
34  
35  
36  
37  
38  
39  
40  
41  
42  
43  
44  
45  
46  
47  
48  
49  
50  
51  
52  
53  
54  
55  
56  
57  
58  
59  
60

For peer review only

## Abstract

### Objectives

To describe variations in Covid-19 outcomes in relation to local risks within a well-defined but diverse single-city area

### Design

Observational study of COVID-19 outcomes using quality-assured integrated data from a single UK hospital contextualised to its feeder-population and associated factors (comorbidities, ethnicity, age, deprivation).

### Setting/Participants

Single-city hospital with a feeder-population of 228,632 adults in Wolverhampton.

### Main Outcome Measures

Hospital admissions (defined as COVID or non-COVID admissions) and mortality (defined as COVID deaths or non-COVID deaths).

### Results

5558 patients admitted, 686 died (556 in hospital); 930 were COVID-19 admissions (CA), of which 270 were hospital COVID deaths, 47 non-COVID deaths, 36 deaths post-discharge; 4628 non-COVID-19 admissions (NCA), 239 in-hospital deaths (2 COVID), 94 deaths post-discharge. 223,074 adults not-admitted, 407 died. Age, gender, multi-morbidity and Black ethnicity (OR 2.1 [95%CI 1.5-3.2]  $p < 0.001$ , compared with White ethnicity, absolute excess risk of  $< 1/1,000$ ) were associated with COVID-19 admission and mortality. The South Asian cohort had lower CA and NCA, lower mortality compared to the White group (CA (0.5[0.3-0.8],  $p < 0.01$ ), NCA (0.4[0.3-0.6]  $p < 0.001$ ), community deaths (0.5[0.3-0.7]  $p < 0.001$ ). Despite many common risk-factors for CA and NCA, ethnic groups had different admission rates, and within-groups differing association of risk-factors. Deprivation impacted only in White ethnicity, in the oldest age bracket and in a lesser (not most) deprived quintile.

### Conclusions

Wolverhampton's results, reflecting high ethnic diversity and deprivation, are similar to other studies for Black ethnicity, age and comorbidity risk in COVID-19 but strikingly different in South Asians and for deprivation. Sequentially considering population, then hospital-based NCA and CA outcomes, we present a complete single health-economy picture. Risk-factors may differ within ethnic groups; our data may be more representative of communities with high BAME populations, highlighting the need for locally focussed public health strategies. We emphasise the need for a more comprehensible and nuanced conveyance of risk.

**Strengths and limitations of this study**

- In contrast to the majority of other studies of factors related to COVID-19 morbidity and mortality we used data from both a single city hospital and its feeder population
- Our observational study used a high quality and complete dataset from the local population and the hospital serving it to examine the association of purported risk factors with severity and mortality.
- Our study method enables assessment of the importance of evaluating such risks in the local, and not just national, population setting taking into account the local variations in patient backgrounds
- This nuanced approach factors in regional variation in elements such as ethnicity and deprivation by being specifically linked to the source population
- Although limiting our study to our local population makes our findings less generalisable it nevertheless allows evaluation of the importance of demographic and geographical variation.

## Introduction

In understanding the natural history of disease, fundamental to healthcare, the COVID-19 (hereafter referred to as “COVID”) pandemic highlights issues within data repositories. Constructing multiple source datasets has complexity in case definition, data acquisition, integration, quality, completeness, coding accuracy and the clinical meaning of analysis outcomes.<sup>1-4</sup> Emphasising this challenge, national UK data were initially collated via the Patient Notification System, requiring a positive swab test up until the 28<sup>th</sup> April 2020 but revised to include clinical definitions given an estimated false negative rate testing rate of up to 29%.<sup>5-8</sup> Well-established primary care databases, may have significant inaccuracy and do not include hospital secondary care information.<sup>9</sup> A large UK primary care epidemiological study also used national COVID (SARS-CoV-2) positive swab cases for case definition.<sup>2</sup> Conversely, secondary care case series and international registry studies for specific diseases are not linked to primary care datasets.<sup>10-14</sup> Numerous studies have described the risk factors associated with COVID-19 mortality, which have been from primary care, secondary care and meta-analyses.<sup>15,16</sup> Although these studies describe risk factors for severity, admission, and mortality with COVID-19 infection, they typically either use large secondary care or primary care data sources, without amalgamating this data. Therefore important caveats exist in utilising and interpreting such data and drawing clinically important conclusions regarding the adverse associations of ethnicity with outcomes.<sup>2,17</sup>

Our objective, therefore, was to establish a tightly governed comprehensive, multi-source, integrated, quality assured local structured clinical data set, used for the purposes of direct care, define cohorts at risk, to systematically improve clinical coding and mortality recording accuracy, and to enable an informed understanding of factors influencing hospital activity, including admissions and most especially to describe variations in Covid-19 outcomes in relation to local risks within a well-defined but diverse single city area.. This approach should ultimately inform public health initiatives. We present a proof of principle study to evaluate the utility of this approach in relation to a single UK city wide health district, reporting our findings regarding population wide factors that may have an association with 2 key COVID outcomes, hospital admission and mortality, over the first 12 weeks of the pandemic in this City.

## Methods

### General Method

The time frame spanned 1/3/2020 to 24/05/2020.

Data were integrated into an SQL database from primary care, community and hospital clinical and pathology systems for all people resident in Wolverhampton or registered to Wolverhampton practices and those from immediately adjacent districts with emergency admission to New Cross Hospital (NXH). Only those alive at the start point were included and subsequently death and date of death were tracked. The final total population aged >18 was 228,632, of whom 1063 were resident but not Wolverhampton GP registered, 1521 who were registered but not

1 City resident and 1026 neither resident nor registered from immediately surrounding areas with an emergency  
2 admission to NXH, such that 99.5% of the cohort were registered and/or resident constituting 88% of COVID  
3 admissions and 91% COVID deaths. The Index of Multiple Deprivation (IMD) was allocated according to  
4 postcode. Unavailable smoking status (15%) was reallocated to “non-smoker” (recognising that this is an  
5 assumption which may potentially introduce slight bias). Missing body mass index (22%) were replaced by the age-  
6 related (5-year band) mean value in the cohort. Ethnicity data from all sources were reviewed, only unambiguous  
7 data were accepted, and recoded into Caucasian (White), South-Asian, Black, Mixed Ethnicity, Chinese with 7.5%  
8 remaining “Unknown”. Comorbidities were accrued and cross-checked from primary care and hospital coding to  
9 include: Asthma, COPD, Diabetes, Hypertension, Coronary Artery Disease, Stroke and Peripheral Arterial Disease,  
10 Chronic Heart Failure, Atrial Fibrillation, Chronic Kidney Disease, Cancer, Dementia, Depression, other Mental Health  
11 Disorders, Epilepsy, Learning Difficulties, Osteoarthritis, Rheumatoid arthritis as well as recorded nursing home  
12 residency and palliative care status. Non-elective admissions over the preceding 12 months were  
13 ascertained. During admission, the COVID clinical status was recorded by the Infection Diseases team or the clinical  
14 team in daily updates as “COVID definite”, “COVID probable” or “not COVID”. Formal endpoint coding was in  
15 duplicate with a rolling triangulation audit in place comparing the clinical diagnosis, the coded diagnosis and COVID  
16 pathology status for coding accuracy. Mortality and cause of death were certified in our Medical Examiner System  
17 and also continuously cross-checked against the coded status. COVID coding and death certification arbitration were  
18 supported by the accountable senior responsible consultant (AV). Further validation against the National Strategic  
19 Tracing Service captured deaths outside hospital.

### 34 **Statistical Analysis**

37 This was undertaken in SPSS v26. Factors analysis of all variables considered confounding effects and redundancy,  
38 yielding a 9 component rotated solution explaining 48% of the variance: deprivation and ethnicity were strongly co-  
39 associated in a single component whilst the two principal outcome measures of hospital admission and mortality  
40 were in another distinct component. We adopted a multinomial regression analysis approach. This allowed the  
41 association of those independent factors with the dependent categorical variable, yielding Odds ratios, with their  
42 95% confidence intervals and statistical significance. The analysis was undertaken sequentially to ensure an *a priori*  
43 justification for further analysis. Statistical tests are described in the text and their results considered significant at  
44  $p < 0.05$ .

### 52 **Ethical Approval**

54 This was not sought nor deemed necessary since this work represents a continuous quality improvement  
55 programme of the informatics component of service changes required between various local NHS organisations  
56 for integrated working stipulated during the COVID 19 emergency. Data governance was in line Trust policy and  
57 with the COVID emergency directive of NHS England.

1 **Patient and Public Involvement:** None (not applicable to this type of study)  
 2  
 3  
 4  
 5  
 6

## 7 Results

### 10 Hospital Admissions

11  
 12 The population characteristics are shown in Table 1, grouped according to admission status (No Admission, Non-  
 13 COVID Admission and COVID Admission (NA, NCA, CA respectively) together with their mortality rates.  
 14  
 15

16 **Table 1**

17 The demographic, clinical features and mortality outcomes of a whole adult population (n= 228,632) categorised according to  
 18 their hospital admission status during 12 weeks of the UK COVID-19 pandemic. Data are presented as the mean± SD or as  
 19 percentages. Between groups analysis is by ANOVA or by Chi square for scale or categorical variables respectively. Co-  
 20 morbidities are listed in descending order of frequency.  
 21  
 22  
 23

| 24 Table 1                               | 25 Whole population   | 26 Not admitted | 27 Non COVID Admission | 28 COVID Admission |         |
|------------------------------------------|-----------------------|-----------------|------------------------|--------------------|---------|
| 29 Number (% of total)                   | 228,632               | 223,074 (97.6%) | 4,628 (2%)             | 930 (0.4%)         |         |
| 30 Age (years)                           | 50.0 ± 18.8           | 47.6 ± 18.5     | 63.1 ± 20.5            | 71.4 ± 16.5        | p<0.001 |
| 31 Gender (male, %)                      | 114,866 (50.2%)       | 50.3%           | 48.4%                  | 55.2%              | p<0.001 |
| 32 Ethnicity (% in category)             |                       |                 |                        |                    |         |
| 33 · White                               | 142,781 (62.5%)       | 62.1%           | 77.7%                  | 73.5%              | p<0.001 |
| 34 · South Asian                         | 44,229 (19.3%)        | 19.6%           | 10.4%                  | 8.9%               |         |
| 35 · Black                               | 17,858 (7.8)          | 7.9%            | 4.6%                   | 12.2%              |         |
| 36 · Mixed                               | 5,809 (2.5%)          | 2.6%            | 1.3%                   | 0.6%               |         |
| 37 · Chinese                             | 806 (0.4%)            | 0.4%            | 0.1%                   | 0.2%               |         |
| 38 · Unknown                             | 17,149 (7.5%)         | 7.5%            | 5.8%                   | 4.5%               |         |
| 39 Index of Multiple Deprivation         | 32.8 ± 15.9           | 32.9 ± 15.9     | 30.4 ± 14.4            | 30.7 ± 14.4        | p<0.001 |
| 40 Smoking status (% never)              | 148,046 (64.8%)       | 65%             | 73%                    | 81%                | p<0.001 |
| 41 Body Mass Index (kg/m <sup>2</sup> )  | 27.3 (± 5.7)          | 27.3 (± 5.7)    | 27.8 (± 5.1)           | 27.9 (± 4.6)       | p<0.001 |
| 42 Prior admission (Any 1 year, (≥3) (%) | 15,119 (7%) (0.6%)    | 6% (0.4%)       | 31% (7%)               | 35% (8%)           | p<0.001 |
| 43 Any comorbidity (≥3) (%)              | 110,564 (48 %) (12 %) | 48% (11%)       | 77% (41%)              | 88% (58%)          | p<0.001 |
| 44 Palliative care registered            | 1,530 (0.7%)          | 0.5%            | 4.9%                   | 13.9%              | p<0.001 |
| 45 Nursing home resident                 | 2,130 (0.9%)          | 0.8%            | 4.7%                   | 9.7%               | p<0.001 |
| 46 Hypertension                          | 47,830 (20.9%)        | 20.2%           | 47.6%                  | 64.2%              | p<0.001 |
| 47 Depression                            | 39,153 (17%)          | 17.0%           | 22.4%                  | 18.7%              | p<0.001 |
| 48 Asthma                                | 30,335 (13.3%)        | 13.2%           | 16.1%                  | 16.3%              | p<0.001 |
| 49 Diabetes                              | 20,529 (9.0%)         | 8.6%            | 21.4%                  | 33.8%              | p<0.001 |
| 50 Ischaemic heart disease               | 10,965 (4.8%)         | 4.4%            | 19.9%                  | 23.2%              | p<0.001 |
| 51 Chronic kidney disease                | 10,265 (4.5%)         | 4.1%            | 17.6%                  | 29.0%              | p<0.001 |
| 52 Cancer                                | 9,796 (4.3%)          | 4.0%            | 16.0%                  | 17.8%              | p<0.001 |
| 53 Atrial fibrillation                   | 6,771 (3.0%)          | 2.6%            | 4.7%                   | 8.7%               | p<0.001 |
| 54 Chronic obstructive pulmonary disease | 6,762 (3.0%)          | 2.7%            | 12.3%                  | 15.1%              | p<0.001 |
| 55 Cerebro-vascular disease              | 5,359 (2.3%)          | 2.2%            | 8.8%                   | 13.5%              | p<0.001 |
| 56 Cardiac failure                       | 4,940 (2.2%)          | 1.9%            | 13.1%                  | 20.8%              | p<0.001 |

|                             |              |           |                        |                       |         |
|-----------------------------|--------------|-----------|------------------------|-----------------------|---------|
| Osteoarthritis              | 4,267 (1.9%) | 1.7%      | 8.0%                   | 11.2%                 | p<0.001 |
| Epilepsy                    | 4,035 (1.8%) | 1.7%      | 3.8%                   | 4.5%                  | p<0.001 |
| Rheumatoid arthritis        | 3,284 (1.4%) | 1.4%      | 4.2%                   | 6.2%                  | p<0.001 |
| Mental health disorder      | 2,967 (1.3%) | 1.3%      | 1.7%                   | 1.7%                  | p<0.05  |
| Peripheral vascular disease | 2,724 (1.2%) | 1.1%      | 4.7%                   | 8.7%                  | p<0.001 |
| Dementia                    | 2,304 (1.0%) | 0.9%      | 4.0%                   | 7.8%                  | p<0.001 |
| Learning difficulties       | 1,597 (0.7%) | 0.7%      | 1.0%                   | 1.2%                  | p<0.05  |
| Vital status (n, % died)    | 1,093 (0.5%) | 407, 0.2% | 333, 7.2% <sup>§</sup> | 353, 38% <sup>+</sup> | p<0.001 |

<sup>§</sup>, 237 non-COVID hospital deaths, 94 post discharge deaths in community, 2 hospital COVID deaths; <sup>+</sup>, 270 hospital COVID deaths, 47 non-COVID hospital deaths, 36 post discharge deaths in community

Compared to NA, there was an increased association of all variables with NCA and CA, including age, the number of comorbidities, most individual comorbidities, the surrogate measures of dependency (of being on a palliative care register or nursing home resident), and prior history of emergency admissions. Male gender, BMI, IMD and smoking status were significantly different between the 3 categories. Ethnic minority groupings were significantly different between admission types with the South Asian population prevalence in CA being 46% of that in the comparator NA population whilst the Black population appeared to have a 56% excess. Table 2 gives further numerical detail.

**Table 2**

COVID admission and death by ethnic category showing numbers, absolute rates per 1000 population, and the excess risk and ORs (95% CI) vs the White group as comparator.

*“Chinese”, “Mixed” and “Unknown” categories showed no significant associations as individual categories in this analysis or when merged as “Other or Unknown”.*

| Table 2                            | White         | South Asian                 | Black                       | Other or Unknown            |
|------------------------------------|---------------|-----------------------------|-----------------------------|-----------------------------|
| Total numbers                      | 142,781 (63%) | 44, 229 (19%)               | 17,858 (8%)                 | 23,764 (10%)                |
| COVID admission                    | 684 (74%)     | 83 (9%)                     | 113 (12%)                   | 50 (5%)                     |
| COVID admission/ 1000              | 4.8           | 1.9                         | 6.3                         | 2.1                         |
| COVID admission excess risk / 1000 | comparator    | -2.9                        | 1.5                         | -2.7                        |
| COVID admission OR                 | comparator    | 0.39 (0.31 - 0.48), p<0.001 | 1.31 (1.07 - 1.59), p<0.001 | 0.43 (0.33 - 0.58), p<0.001 |
| COVID death                        | 190 (70%)     | 32 (12%)                    | 39 (14%)                    | 11 (4%)                     |
| COVID death/ 1000                  | 1.3           | 0.7                         | 2.2                         | 0.5                         |
| COVID death excess risk / 1000     | comparator    | -0.6                        | 0.9                         | -0.9                        |
| COVID death OR                     | comparator    | 0.54 (0.37 - 0.79), p<0.01  | 1.64 (1.16 - 2.31), p<0.01  | 0.35 (0.19 - 0.64), p<0.01  |

|                                              |     |                                 |                                   |                                 |
|----------------------------------------------|-----|---------------------------------|-----------------------------------|---------------------------------|
| COVID death / COVID admission / 1000         | 0.3 | 0.4                             | 0.3                               | 0.2                             |
| COVID death in COVID admission OR comparator |     | 1.55 (0.96 - 2.51), p=0.075, ns | 1.19 (0.78 - 1.83), p = 0.423, ns | 0.63 (0.32 - 1.25), p=0.187, ns |

The 3 hospital admissions categories (NA, NCA, CA) were taken as the response variable and submitted to multinomial regression (Table 3). The complete model was highly significant ( $\chi^2=8,869.1$ ,  $p<0.001$ ). Male gender was more prevalent in CA.

**Table 3**

Multinomial regression for the association of factors with COVID or Non COVID related emergency hospital admissions (HA) compared to the reference category of those not admitted (n=223, 074). Data are the Odds Ratio (OR) with 95% confidence intervals. For age and IMD as categorical ordinal variables (data ranges shown), the comparators were the youngest and least deprived quintiles respectively. Comorbidities associations are listed in descending OR order for the CA group. The comparison of CA vs NCA was by binary logistic regression. Variables not listed (Table 1) were excluded stepwise as not significant.

| Table 3                               | COVID HA                   | Non COVID HA             | CHA vs NCHA              |
|---------------------------------------|----------------------------|--------------------------|--------------------------|
| Number (%of population)               | 930 (0.4%)                 | 4,628 (2%)               |                          |
| Gender (male)                         | 1.5 (1.3 - 1.7), p<0.001   | ns, p=0.48               | 1.3 (1.1 - 1.5), p<0.001 |
| Age category Q2 (30 -40)              | 2.7 (1.5 - 5), p<0.01      | 1.2 (1 - 1.3), p<0.05    | 2.2 (1.2 - 4), p<0.05    |
| Age category Q3 (41 - 51)             | 5.1 (2.9 - 9), p<0.001     | 1.4 (1.2 - 1.6), p<0.001 | 3.2 (1.8 - 5.8), p<0.001 |
| Age category Q4 (52 - 65)             | 7.8 (4.6 - 13.4), p<0.001  | 1.7 (1.5 - 1.9), p<0.001 | 3.7 (2.1 - 6.5), p<0.001 |
| Age category Q5 (66 - 113)            | 16.6 (9.7 - 28.3), p<0.001 | 2.9 (2.5 - 3.3), p<0.001 | 4.7 (2.7 - 8.1), p<0.001 |
| IMD category Q2 (16.5 - 27.7)         | 1.8 (1.4 - 2.2), p<0.001   | 2 (1.8 - 2.2), p<0.001   | ns                       |
| IMD category Q3 (27.8 - 39.0)         | 1.7 (1.4 - 2.1), p<0.001   | 1.5 (1.4 - 1.7), p<0.001 | ns                       |
| IMD category Q4 (39.3 - 45.7)         | 1.6 (1.3 - 2), p<0.001     | 1.4 (1.3 - 1.6), p<0.001 | ns                       |
| IMD category Q5 (45.7 - 71.8)         | ns, p=0.517                | ns, p=0.574              | ns                       |
| Ethnicity South Asian                 | 0.4 (0.3 - 0.5), p<0.001   | 0.5 (0.4 - 0.5), p<0.001 | 1 (0.7 - 1.2), ns, 0.735 |
| Ethnicity Black                       | 1.7 (1.3 - 2.1), p<0.001   | 0.6 (0.5 - 0.7), p<0.001 | 3.1 (2.4 - 4), p<0.001   |
| Smoking Current or Ex                 | 0.3 (0.2 - 0.3), p<0.001   | 0.5 (0.4 - 0.5), p<0.001 | 0.7 (0.5 - 0.8), p<0.001 |
| Prior emergency admissions (1 year)   | 1.6 (1.5 - 1.7), p<0.001   | 1.8 (1.7 - 1.8), p<0.001 | 0.9 (0.9 - 1), p<0.05    |
| Palliative care registered            | 4.1 (3.2 - 5.1), p<0.001   | 1.7 (1.4 - 2), p<0.001   | 2.4 (1.9 - 3.1), p<0.001 |
| Nursing home resident                 | 1.7 (1.3 - 2.3), p<0.001   | 1.2 (1 - 1.5), ns, 0.058 | 1.7 (1.3 - 2.2), p<0.001 |
| Co-morbidities $\geq 3$               | 1.5 (1.2 - 1.9), p<0.01    | 1.4 (1.3 - 1.6), p<0.001 | ns                       |
| Chronic obstructive pulmonary disease | 1.9 (1.5 - 2.3), p<0.001   | 1.8 (1.6 - 2), p<0.001   | ns                       |
| Peripheral vascular disease           | 1.8 (1.4 - 2.3), p<0.001   | 1.2 (1 - 1.4), p<0.05    | 1.5 (1.1 - 2), p<0.01    |
| Atrial fibrillation                   | 1.7 (1.4 - 2.1), p<0.001   | 1.4 (1.2 - 1.5), p<0.001 | 1.3 (1.1 - 1.6), p<0.01  |



|    |                          |                          |                          |                          |
|----|--------------------------|--------------------------|--------------------------|--------------------------|
| 1  | Diabetes                 | 1.6 (1.4 - 1.9), p<0.001 | 1.3 (1.2 - 1.4), p<0.001 | 1.4 (1.2 - 1.6), p<0.001 |
| 2  |                          |                          |                          |                          |
| 3  | Cardiac failure          | 1.6 (1.3 - 1.9), p<0.001 | 1.4 (1.2 - 1.6), p<0.001 | ns                       |
| 4  | Rheumatoid arthritis     | 1.5 (1.1 - 2), p<0.01    | ns, p=0.134              | ns                       |
| 5  |                          |                          |                          |                          |
| 6  | Epilepsy                 | 1.4 (1 - 2), p<0.05      | 1.4 (1.2 - 1.6), p<0.001 | ns                       |
| 7  | Chronic kidney disease   | 1.3 (1.1 - 1.6), p<0.01  | 1.2 (1 - 1.3), p<0.01    | ns                       |
| 8  |                          |                          |                          |                          |
| 9  | Hypertension             | 1.2 (1 - 1.5), p<0.05    | ns, p=0.196              | 1.2 (1 - 1.4), p<0.05    |
| 10 |                          |                          |                          |                          |
| 11 | Cancer                   | 1.2 (1 - 1.5), p<0.05    | 1.6 (1.5 - 1.8), p<0.001 | 0.8 (0.7 - 1), p<0.05    |
| 12 | Cerebro-vascular disease | ns, p=0.101              | 1.2 (1 - 1.3), p<0.05    | ns                       |
| 13 |                          |                          |                          |                          |
| 14 | Ischaemic heart disease  | ns, p=0.859              | 1.5 (1.3 - 1.6), p<0.001 | 0.7 (0.6 - 0.9), p<0.01  |
| 15 | Depression               | ns, p=0.34               | 1.1 (1 - 1.2), p<0.01    | ns                       |
| 16 |                          |                          |                          |                          |
| 17 | Dementia                 | ns, p=0.059              | 0.8 (0.7 - 1), p<0.05    | ns                       |
| 18 |                          |                          |                          |                          |

Age distribution (Figure 1a) differed significantly for CA and NCA versus NA, and the two admission groups differed significantly from each other, reflecting the higher mean age in CA. The pattern for deprivation (Figure 1b) showed the peak admission rates to be in the second least deprived quintile with the most deprived quintile not being significantly different from the least deprived quintile, whilst the 2 admission groups did not differ significantly from each other in this regard. There was a decreased relative risk for admission in either group with current or previous smoking. Both admission groupings had a significantly increased history of prior emergency admissions, established multi-morbidity, being nursing home resident or in a palliative phase of care with these latter two characteristics in significantly higher prevalence in CA compared to NCA. Both groups shared individual comorbidities in higher risk, but with some differential effect for diabetes, hypertension, atrial fibrillation and peripheral vascular disease which were increased in CA.

The South Asian ethnic group was less likely to have a CA or NCA (60% and 50% crude percentage reduced risk respectively) compared to the White ethnic reference category whilst the Black ethnic group shared the significant propensity not to have an NCA but had a markedly increased relative risk (70%) for CA. Ethnicity related outcomes were examined specifically amongst those with COVID admission, by comparing those admitted to those not admitted within their ethnic category in separate binary regression analyses (all  $\chi^2 > 252.4$ ,  $p < 0.001$ ) (Table 4).

**Table 4**

Outcomes by individual ethnic category for those specifically with COVID hospital admissions compared those not admitted within individual ethnic grouping as examined in binary regression analysis. Values are the Odds Ratio with 95%CI.

| Table 4                             | Black                            | South Asian                       | White                           |
|-------------------------------------|----------------------------------|-----------------------------------|---------------------------------|
| Numbers admitted / not admitted     | 113 (0.6%) / 17,530              | 83 (0.2%) / 43,663                | 684 (0.5%) / 138,500            |
| Gender (male)                       | ns                               | 2 (1.2 - 3.2), $p < 0.01$         | 1.6 (1.4 - 1.9), $p < 0.001$    |
| Age category Q2 (30 - 40)           | 2.3 (0.6 - 8.6), ns, $p = 0.225$ | 1.8 (0.5 - 6.8), ns, $p = 0.417$  | 3 (1.3 - 6.8), $p < 0.01$       |
| Age category Q3 (41 - 51)           | 3.1 (0.9 - 11), ns, $p = 0.083$  | 2.6 (0.7 - 9.3), ns, $p = 0.148$  | 4.9 (2.2 - 10.5), $p < 0.001$   |
| Age category Q4 (52 - 65)           | 3.8 (1.1 - 13.4), $p < 0.05$     | 3.1 (0.9 - 10.8), ns, $p = 0.082$ | 9.7 (4.7 - 20), $p < 0.001$     |
| Age category Q5 (66 - 113)          | 10 (2.8 - 36), $p < 0.001$       | 4.5 (1.3 - 16), $p < 0.05$        | 21.2 (10.4 - 43.3), $p < 0.001$ |
| IMD category Q2 (16.5 - 27.7)       | ns                               | ns                                | 1.7 (1.4 - 2.1), $p < 0.001$    |
| IMD category Q3 (27.8 - 39.0)       | ns                               | ns                                | 1.6 (1.3 - 2.1), $p < 0.001$    |
| IMD category Q4 (39.3 - 45.7)       | ns                               | ns                                | 1.5 (1.2 - 2), $p < 0.01$       |
| IMD category Q5 (45.7 - 71.8)       | ns                               | ns                                | ns,                             |
| Smoking Current or Ex               | 0.3 (0.2 - 0.6), $p < 0.001$     | 0.2 (0.1 - 0.6), $p < 0.01$       | 0.3 (0.2 - 0.3), $p < 0.001$    |
| Prior emergency admissions (1 year) | ns                               | 1.5 (1.2 - 1.8), $p < 0.001$      | 1.5 (1.4 - 1.6), $p < 0.001$    |
| Palliative care registered          | 3.8 (1.8 - 8), $p < 0.001$       | 11 (5.5 - 21.7), $p < 0.001$      | 3.8 (2.9 - 5), $p < 0.001$      |
| Nursing home resident               | ns                               | 4.5 (1.4 - 14.2), $p < 0.05$      | 1.6 (1.1 - 2.2), $p < 0.01$     |
| Co-morbidities $\geq 3$             | 2.6 (1.5 - 4.4), $p < 0.001$     | ns                                | 1.7 (1.3 - 2.1), $p < 0.001$    |
| Atrial fibrillation                 | 2 (1 - 3.7), $p < 0.05$          | 2.8 (1.4 - 5.6), $p < 0.01$       | 1.6 (1.3 - 2), $p < 0.001$      |
| Cardiac failure                     | 2.2 (1.2 - 3.9), $p < 0.05$      | ns                                | 1.7 (1.3 - 2.1), $p < 0.001$    |

|                                       |                         |                          |                          |
|---------------------------------------|-------------------------|--------------------------|--------------------------|
| Chronic kidney disease                | ns                      | ns                       | 1.4 (1.1 - 1.7), p<0.01  |
| Chronic obstructive pulmonary disease | ns                      | ns                       | 1.9 (1.5 - 2.3), p<0.001 |
| Diabetes                              | ns                      | 4.4 (2.6 - 7.5), p<0.001 | 1.5 (1.3 - 1.9), p<0.001 |
| Hypertension                          | 2.2 (1.2 - 4.1), p<0.01 | ns                       | ns                       |
| Peripheral vascular disease           | ns                      | 3.7 (1.6 - 8.8), p<0.01  | 1.9 (1.4 - 2.5), p<0.001 |
| Rheumatoid arthritis                  | ns                      | ns                       | 1.6 (1.1 - 2.1), p<0.01  |

Age, gender, preceding emergency admissions, palliative phase, comorbidity, and nursing home residence were significant associations in 2 or more of the ethnic groups. Of note, patterns of significantly associated individual comorbidities were different between the ethnic groups: Black - hypertension, atrial fibrillation and cardiac failure; South Asian - diabetes, peripheral vascular disease and atrial fibrillation; White - specific association with COPD, CKD, and RA. Deprivation had a significant impact only in the White group. The inter-relationship of age, deprivation with ethnicity and the impact of white ethnicity in the oldest quintile in lesser deprived categories can be seen in Figure 1c. In a simplified model of admission type and ethnicity ( $\chi^2=4542.9$ ,  $p<0.001$ ) with only age and deprivation entered categorically together with their interaction ( $\chi^2= 412.7$ ,  $p<0.001$ ), the ORs for CA compared to Whites were Black 2.08 (1.70 - 2.57) ( $p<0.001$ ) and South Asian 0.56 (0.44 – 0.70) ( $p<0.001$ ), with both groups still less likely to have NCA ( $p<0.001$ ).

### Absolute risk of COVID Admission within Ethnic groups

The absolute risk from COVID hospital admission was 4.8 / 1000 population and Table 2 shows this broken down by ethnic grouping giving numbers, percentages, absolute risk and excess risk with ORs compared to the White group, with the South Asian group showing a lower and the Black group a higher absolute risk as reflected in the ORs.

### Mortality outcomes

COVID and non-COVID hospital death and death in the community (CHD, NCHD, DIC) were analysed in stepwise backwards multinomial regression ( $\chi^2=5,548.3$ ,  $p<0.001$ ) (Table 5).

**Table 5**

Multinomial regression of mortality outcomes over the 12 weeks period for those that died (n= 1093) either in the community (n= 537) or Non COVID (n = 284) and COVID related (n= 272) hospital deaths (HD) (See Table 1) compared to those who were alive (n = 227, 539). Results are the Odds ratio with 95% confidence intervals. For age and IMD categories the comparators were the youngest and least deprived quintile respectively. Variables not listed from Table 1 were excluded stepwise (backwards) as not significant.

| Table 5 | COVID HD | Non COVID HD | Community Death |
|---------|----------|--------------|-----------------|
|---------|----------|--------------|-----------------|

|                                       |                              |                          |                            |
|---------------------------------------|------------------------------|--------------------------|----------------------------|
| Gender (male)                         | 2 (1.5 - 2.6), p<0.001       | 1.5 (1.2 - 1.9), p<0.01  | 1.7 (1.4 - 2.1), p<0.001   |
| Age category Q2 (30 -40)              | ns, p= 0.997                 | >100, p<0.001            | ns, p= 0.85                |
| Age category Q3 (41 - 51)             | 2.5 (0.5 - 14), ns, p= 0.283 | >100, p<0.001            | 6.6 (1.9 - 22.6), p<0.01   |
| Age category Q4 (52 - 65)             | 10.5 (2.4 - 44.8), p<0.01    | >100, p<0.001            | 13.9 (4.3 - 44.9), p<0.001 |
| Age category Q5 (66 - 113)            | 39.9 (9.6 - 165.5), p<0.001  | >100, p<0.001            | 41.3 (13 - 130.9), p<0.001 |
| IMD category Q2 (16.5 - 27.7)         | ns, p= 0.163                 | 1.8 (1.2 - 2.6), p<0.01  | ns, p= 0.708               |
| IMD category Q3 (27.8 - 39.0)         | 1.5 (1 - 2.2), p<0.05        | 2.2 (1.5 - 3.1), p<0.001 | ns, p= 0.054               |
| IMD category Q4 (39.3 - 45.7)         | ns, p= 0.319                 | 1.8 (1.2 - 2.7), p<0.01  | ns, p= 0.384               |
| IMD category Q5 (45.7 - 71.8)         | ns, p= 0.713                 | ns, p= 0.455             | 1.6 (1.2 - 2.1), p<0.01    |
| Ethnicity South Asian                 | 0.5 (0.3 - 0.8), p<0.01      | 0.4 (0.3 - 0.6), p<0.001 | 0.5 (0.3 - 0.7), p<0.001   |
| Ethnicity Black                       | 2.1 (1.5 - 3.2), p<0.001     | 0.5 (0.3 - 1), p<0.05    | ns, p= 0.841               |
| Smoking Current or Ex                 | 0 (0 - 0), p<0.001           | 0.1 (0.1 - 0.2), p<0.001 | 0.1 (0.1 - 0.1), p<0.001   |
| Body Mass Index                       | 1 (0.9 - 1), p<0.01          | 1 (1 - 1), ns, p= 0.12   | 1 (1 - 1), p<0.05          |
| Prior emergency admissions (1year)    | 1.2 (1.1 - 1.3), p<0.001     | 1.3 (1.2 - 1.4), p<0.001 | 1.3 (1.2 - 1.4), p<0.001   |
| Palliative care registered            | 9.5 (6.8 - 13.2), p<0.001    | 5.9 (4.2 - 8.4), p<0.001 | 5.9 (4.7 - 7.5), p<0.001   |
| Nursing home resident                 | ns, p= 0.547                 | ns, p= 0.634             | 3.5 (2.7 - 4.6), p<0.001   |
| Co-morbidities ≥3                     | 3 (2 - 4.4), p<0.001         | 2.3 (1.6 - 3.3), p<0.001 | 1.7 (1.3 - 2.3), p<0.001   |
| Peripheral vascular disease           | 2.6 (1.8 - 3.9), p<0.001     | 1.9 (1.3 - 2.9), p<0.01  | ns, p= 0.232               |
| Chronic obstructive pulmonary disease | 2.1 (1.4 - 3), p<0.001       | 3.8 (2.8 - 5.2), p<0.001 | 2.2 (1.7 - 2.9), p<0.001   |
| Cardiac failure                       | 2 (1.5 - 2.8), p<0.001       | 1.7 (1.2 - 2.3), p<0.01  | 1.8 (1.4 - 2.3), p<0.001   |
| Chronic kidney disease                | 1.6 (1.2 - 2.1), p<0.01      | ns, p= 0.095             | ns, p= 0.328               |
| Diabetes                              | 1.4 (1.1 - 1.9), p<0.05      | ns, p= 0.465             | ns, p= 0.426               |
| Atrial fibrillation                   | 1.4 (1 - 1.9), p<0.05        | 1.9 (1.4 - 2.6), p<0.001 | ns, p= 0.602               |
| Cancer                                | ns, p= 0.338                 | 1.5 (1.1 - 2), p<0.01    | 2.1 (1.7 - 2.6), p<0.001   |
| Dementia                              | ns, p= 0.878                 | ns, p= 0.505             | 2 (1.5 - 2.6), p<0.001     |
| Asthma                                | ns, p= 0.337                 | 0.7 (0.5 - 1), p<0.05    | ns, p= 0.376               |

1 Male gender was significantly positively associated with mortality in all 3 categories. Increasing age was a significant  
2 factor, but there was no significant difference in age quintile distribution ( $\chi^2=12.168$ ,  $p=0.144$ , ns) with 89%, 84%  
3 and 86% in the oldest quintile in the CHD, NCHD and DIC groups respectively. For deprivation, for CHD and NCHD  
4 the pattern mirrored that of hospital admission with significantly increased mortality rates in the lesser deprived  
5 quintiles but not in the highest quintile whereas in DIC, a significant effect showing an increased mortality rate was  
6 only seen in the most deprived quintile. All categories shared a propensity for greater prior emergency admissions,  
7 multi morbidity and being in a palliative phase of care whilst being nursing home residency was associated with  
8 death in the community rather than hospital death. Individual morbidities varied in their associations, noting that  
9 diabetes and chronic kidney disease were in increased association with mortality only in the CHD group. The Black  
10 ethnic minority had significantly higher, and the South Asian significantly lower COVID hospital mortality rate,  
11 proportionately mirroring admission rates. Directly comparing CHD to NCHD confirmed a significantly increased  
12 association with Black ethnicity (OR 4.6 (2 - 10.2),  $p<0.003$ ), diabetes (OR 1.5 (1 - 2.3),  $p<0.005$ ) and chronic kidney  
13 disease (OR 1.6 (1.1 - 2.3),  $p<0.004$ ) and an even greater negative association with current or previous smoking (OR  
14 0.1 (0 - 0.3),  $p<0.002$ ).

### 25 **Absolute risk of COVID Death by Ethnic group**

26 Specifically for COVID death, Table 2 shows numbers, percentages, absolute risk and excess risk with unadjusted ORs  
27 for the ethnic minorities compared to the White group and Figure 2a shows the distribution of mortality outcome by  
28 ethnic category ( $\chi^2 = 126.1$ ,  $p<0.001$ ). The absolute risk of COVID death was 1.32, 0.73 and 2.2 per 1000 population  
29 in the White, South Asian and Black ethnic groups and the excess risk was -0.61 (negative) and 0.85 deaths per 1000  
30 population in South Asians and Blacks versus Whites respectively. Compared to the White population, the  
31 unadjusted OR (95% CI) for COVID death for the Black and Asian groups was 1.6 (1.2 – 2.3) and 0.5 (0.4 – 0.8)  
32 respectively (both  $p<0.01$ ). The ethnic groups differed significantly in age (White  $50\pm 20$ , South Asian  $45\pm 16$ , Black  
33  $45\pm 17$  years,  $F=1868.9$ ,  $P<0.001$ ) and age was the dominant factor associated with hospital admission and death  
34 (Tables 1, 3, 4, 5). To avoid any potential misrepresentation of mortality outcomes by statistical age adjustment, the  
35 absolute effects were considered for the oldest quintile only where 84% of all COVID deaths occurred, in which case  
36 the ORs were Black 3.9 (2.7 – 5.6) ( $p<0.001$ ) and South Asian 0.9 (0.6 – 1.4) ( $p=0.72$ , ns) (Figure 2b).

### 37 **COVID Hospital admission and COVID mortality**

38 By introducing hospital admission status, the COVID mortality ORs were Black 1.3 (0.9 – 2.0) ( $p=0.206$ , ns) and South  
39 Asian 1.5 (0.9 – 2.3) ( $p=0.098$ , ns) were similar, indicating similar in hospital mortality in contrast to the whole  
40 population effect. To negate this potential effect of prior propensity for acquisition of serious COVID infection, and  
41 focusing on the Black and South Asian minorities compared to the White majority, a narrower assessment of those  
42 who were admitted with COVID and had a COVID death was made. Amongst 930 COVID admissions, excluding those  
43 with a COVID admission but with non-COVID death ( $n = 83$  (9%)), COVID death occurred 270 (32%) (White 189, South  
44 Asian 32, Black 38, Other 11). The ORs for the association of ethnicity with COVID mortality were Black 1.2 (0.7 – 1.8)

( $p=0.423$ , ns) and South Asian 1.6 (1.0 – 2.5) ( $p= 0.075$ , ns) ( $\chi^2= 5.92$ ,  $p= 0.115$ , ns) (Figure 2c). Utilising the full model with all independent variables, including age, which remained significantly different between ethnic groups ( $F= 13.23$ ,  $p<0.001$ ), then the significantly associated variables were age, gender, smoking status, body mass index, palliative phase of life, multi-morbidity and the individual comorbidities of cardiac failure, chronic kidney disease and peripheral vascular disease but not ethnic grouping or deprivation score (Table 6).

**Table 6**

Multinomial regression amongst those with a COVID admission restricted to the White, Black and South Asian ethnic groups ( $n=797$ ) comparing to those with COVID death ( $n= 259$ ) to those who were alive at 12 weeks. Results are the Odds Ratio with 95% confidence intervals. Variables not listed from Table 1 were excluded stepwise (backwards) as not significant.

| Table 6                              | OR COVID death vs alive        |
|--------------------------------------|--------------------------------|
| Age                                  | 1.05 (1.03 - 1.07), $p<0.001$  |
| Gender (male)                        | 1.91 (1.3 - 2.83), $p<0.01$    |
| Smoking Current or Ex                | 0.01 (0 - 0.04), $p<0.001$     |
| Body Mass Index (kg/m <sup>2</sup> ) | 0.92 (0.86 - 0.98), $p<0.01$   |
| Palliative care registered           | 7.83 (4.21 - 14.56), $p<0.001$ |
| Co-morbidities $\geq 3$              | 1.64 (1 - 2.67), $p<0.05$      |
| Cardiac failure                      | 1.82 (1.14 - 2.92), $p<0.05$   |
| Chronic kidney disease               | 1.69 (1.09 - 2.63), $p<0.05$   |
| Peripheral vascular disease          | 2.27 (1.12 - 4.59), $p<0.05$   |

Finally, Table 2 shows the absolute risks of COVID death in COVID hospital admission and ORs which are consistent with the findings of the modelled data.

## Discussion

### Principal findings:

Over and above known general associations with hospital admission and mortality, our study suggest a complex association of deprivation and points to heterogeneity of the impact of ethnicity, both of which may vary by locality. We highlight the need for local health economies to have robust, accurate and integrated clinical data in order to assess and inform local decisions making and , in particular, at a time of heightened anxiety, we raise a concern about the conveyance of risk to local communities. The crucial differences in relationship to other studies are as follows:

### General Associations

Uncontroversially, factors associated with non-COVID or COVID hospital admission and death included age, gender, prior emergency admissions, and palliative phase of life, nursing home residence and multi-morbidity with specific comorbidities associated with COVID admission or death and with ethnic status. Within the limitations of our study, we have found smokers as an under-represented group in COVID-19 admission and mortality. Although a number of hypotheses and have been proposed to account for a possible protective effect, this remains an area under further evaluation.<sup>18</sup> It is suggested that any association of smoking with better COVID outcomes, observed in some other studies,<sup>2,19</sup> may be questioned when taken in the context of this being common to non-COVID admissions and death during this period.

### COVID vs Non COVID Admissions

The significant differences were age, gender and degree of comorbidity complexity (palliative care, nursing home) but as it is likely that patterns of emergency admissions differed at this time, comparisons of COVID to non-COVID hospital admission may have little relevance to COVID outcomes, noteworthy for studies that have reported on COVID hospital admission alone.<sup>12,13,20</sup>

### Deprivation

For hospital non-COVID and COVID admission and death, the pattern was for excess in lesser deprived quintiles in the White ethnic population but not within ethnic minority groups where deprivation was not a significant factor. This contrasts with other studies:<sup>2,5</sup> in some deprivation was not a significantly associated factor in fully adjusted models,<sup>21</sup> whilst other UK studies,<sup>20</sup> and most overseas studies, have not considered this.<sup>12,13</sup> Following the H1N1 pandemic influenza of 2009, many studies indicated effects of deprivation including a rural urban divide impact,<sup>22</sup> as is seen in this pandemic.<sup>15</sup> Our findings within a health economy (ie based on a local population) with significant deprivation call for the need to explore this association within larger studies specifically within urban areas.

### Ethnicity

We note that a recent meta-analysis shows heterogeneity in the association of ethnicity to COVID mortality.<sup>23</sup> In a large population study reporting adverse odds ratios for all ethnic groups, their crude unadjusted data showed significantly increased risk in the Black ( $\chi^2 = 17.464$ ,  $p < 0.001$ ) but not in the South Asian group ( $\chi^2 = 3.238$ ,  $p = 0.072$ ).<sup>2</sup> This was also shown in another population level study.<sup>15</sup> In the largest reported hospital admission series both ethnic groups had significantly lower unadjusted mortality rates,<sup>17</sup> whilst in their modelled data no effect was seen amongst Blacks. In a study from New York there was no adverse ethnicity signal,<sup>12,13</sup> and early reported adverse ethnicity outcomes in the 2009 UK flu pandemic,<sup>24</sup> did not withstand subsequent review.<sup>25</sup> We find our Black population had significantly higher and the South Asian lower crude and adjusted COVID admission rates compared to Whites, also observing that both ethnic subgroups had lower non-COVID hospital admissions, further contextualising the strong



1 effect in the Black cohort. In both groups, their crude and adjusted patterns of COVID mortality mirrored that of  
2 COVID hospital admission but from the numerical base of COVID admission, there was no significant difference  
3 between the Black and South Asian compared to the White groups, highlighting pitfalls of examining effects in  
4 isolation. Our data in the Black population is broadly in keeping with some studies showing excess COVID  
5 hospitalisation and mortality but the South Asian group's lower absolute and adjusted rate of admission and death  
6 from COVID 19 are strikingly different. Given the variation in findings to date, we do not consider this an  
7 "unexpected finding", and hypothesise that many local population factors are at play including population density,  
8 family size, housing, duration of immigration, country of birth (including UK born) and occupation and the precise  
9 ethnic group within the 'South Asian' population may well be of importance. A recent updated analysis by the UK  
10 Office for National Statistics has emphasised that "*ethnic differences in mortality involving COVID-19 are most  
11 strongly associated with demographic and socio-economic factors, such as place of residence and occupational  
12 exposures, and cannot be explained by pre-existing health conditions*" which conclusion is consistent with our locally-  
13 dictated findings.<sup>26</sup> Otherwise within BAME groups we find specific individual comorbidities vary in their association  
14 with COVID risks: in South Asians these are diabetes, peripheral vascular disease and atrial fibrillation; in the Black  
15 population hypertension, atrial fibrillation and cardiac failure; in white ethnicity most co-morbidities but in particular  
16 COPD, chronic kidney disease and rheumatoid arthritis.

### 29 **Strengths and Weaknesses.**

32 Combining Wolverhampton's health data enabled us to evaluate our local population's heterogeneous demographic  
33 factors and their associations with community or hospital non-COVID and COVID hospital admission and mortality,  
34 by uniquely approaching these outcomes simultaneously. This local nuance complements larger studies, informing  
35 appraisal of risk from an urban, and multi-ethnic and deprived setting, highlighting concerns of extrapolation from  
36 larger datasets to UK localities. An example of a particular strength of the data quality was the cross check  
37 ascertainment of COVID admission, without sole reliance on COVID testing, permitting specific categorisation of  
38 deaths (COVID, non-COVID and post discharge) rather than less accurately into global mortality.

45 Limitations of the study: This is a twelve-week evaluation spanning the pandemic's upsurge and peak; the population  
46 and event number were comparatively small; cause of death in the community was unknown and it is likely that  
47 people died away from the hospital undiagnosed with COVID 19. A further weakness of the study is that there was  
48 some missing data but this was very limited in magnitude and only affected 3 variables: BMI, smoking and ethnicity.  
49 We are confident that these were dealt with appropriately; for BMI as described in Methods; for smoking we coded  
50 all unknown smoking as non-smokers on the very likely assumption that the vastly greater majority were non-  
51 smokers, whilst missing ethnicity was coded as "Unknown" and analysed as such. Given the degree of completeness  
52 rather than incompleteness of our data, we consider our approach approximates to a complete case analysis, arising  
53 from significant effort on multisource data accrual, integration and quality. We thus do not feel that multiple  
54 imputation should be applied to replace missing data, since we do not feel this can possibly improve precision. In so  
55 doing, we are thus also avoiding the greater and well-recognized potential to introduce bias from a poorly fitting



1 imputation models.<sup>27</sup> We consider this to be a strength of the paper. One further consideration is that whilst being  
2 aligned to the population at 99.5% concordance, hospital data were not totally drawn from the City population,  
3 which varied by GP registration, residency, or admission from immediately surrounding areas and a small proportion  
4 of admissions were non-resident or non-registered, so this is not strictly an epidemiological study but an  
5 observational study comparing defined cohorts in tiers of analysis (e.g. COVID death amongst COVID admissions)  
6 where this caveat does not apply.<sup>28</sup>  
7  
8  
9  
10

### 11 **Implications for clinicians and policy makers**

12  
13  
14  
15 We show that a variety of recognised factors were associated with COVID death, as with non-COVID death. At our  
16 local level, COVID admission and death were not strongly associated with worsening deprivation, with a novel  
17 potential different relationship in the White population.  
18  
19

20  
21 Higher absolute and adjusted COVID admission and mortality occurred in the Black population whilst they were  
22 reduced in Wolverhampton's South Asian community. We point out the non-significant association between in-  
23 hospital COVID-19 case fatality and ethnicity, raising the probability that COVID-19 mortality relates to differential  
24 risks of exposure, susceptibility and disease contraction before hospital admission, let alone the possible avoidance  
25 of hospital admission. Two important considerations are the potential excessive use of multiple factors and the  
26 disruption of the perspective from a population's base through hospital admissions to COVID specific admission,  
27 leading to widely varying conclusions, highlighting the difficulties of using observational data and the potential for  
28 Collider bias.<sup>29</sup> We support the case for more localised population-based studies of both hospital admission and  
29 subsequent death, such as ours, in which the denominator and numerator populations can be clearly linked and are  
30 fully and transparently ascertained and characterised. To avoid associations in the data being due to the way in  
31 which data are sampled, local health economies should be mandated to link hospital and primary care data across  
32 their population level down to the un-anonymised individual level; they should, in preparation for future epidemics,  
33 have data quality mechanisms in place to ensure accuracy in their demographics, the accrual of important missing  
34 data and the triangulation of key outcomes to minimise false positive and negative results. This includes the need to  
35 have a robust, systematic, accurate and timely approach to the recording of death whether in the community or  
36 hospital setting. A defined data set and its capture in routine clinical systems seems apposite.<sup>30</sup> Accepting that  
37 variation in findings in different population subsets is both inevitable and valid, we would suggest the need for the  
38 public health and research community to accommodate uncertainty in emergent evidence, learning from the  
39 experience of previous viral pandemics. This includes the need to have a robust, systematic, accurate and timely  
40 approach to the recording of death whether in the community or hospital setting.<sup>31</sup>  
41  
42  
43  
44  
45  
46  
47  
48  
49  
50  
51  
52  
53  
54  
55  
56  
57  
58

### 59 **The conveyance of risk**

1 Public health messages are vital to convey but population adjusted risk rates may confuse, adversely impacting  
2 behaviors such that, it is feared, hospital admission patterns may change unfavourably. Absolute, absolute excess,  
3 relative, unadjusted and adjusted risk is complex to communicate even for healthcare professionals making them  
4 susceptible to reasoning errors and misinterpretation of probabilities<sup>32</sup> and individuals, with erstwhile health risk,  
5 should know about the magnitude of risk in a way that can be conceptualised.<sup>33,34</sup> For our Black population, the fully-  
6 modelled OR for COVID mortality was 2.1, the absolute risk 2.2 / 1000 people or an excess risk of 0.9/1000. A Black  
7 person in Wolverhampton ought to be informed that “twice as likely to die of COVID” compared to the White  
8 community can also mean “a 1 in 1000 excess risk”.

### 15 **Future research**

16 Crucially, we therefore argue that in reporting future research of this kind, during the current pandemic and beyond,  
17 there is an ethical obligation for the standardisation of the conveyance of risk in a manner that spans the absolute to  
18 the relative so that is easily comprehensible to the individuals and populations at risk and others, including health  
19 professionals, politicians and the media. These are all matters in which the editorial and peer review mechanism of  
20 our medical journals have a vital role.

21 **Author contributions:** Accountable senior author BMS; Data analysis, manuscript writing: BMS, JB, SJD, AV;  
22 Preparation for submission: SJD, BMS, JB; Database quality, data integration and data quality and integration: AV,  
23 BMS, VK; Reading drafts as lay expert: SM; Statistical advice: AN; All authors contributed intellectual content during  
24 the drafting and revision of the work and approved the final version.

25 **Transparency declaration:** BMS affirms that the manuscript is an honest, accurate, and transparent account of the  
26 study being reported; that no important aspects of the study have been omitted; and that any discrepancies from  
27 the study as planned (and, if relevant, registered) have been explained

28 **Funding:** None

29 **Competing interest statement** All authors have completed the Unified Competing Interest form (available on  
30 request from the corresponding author) and declare: no support from any organisation for the submitted work; no  
31 financial relationships with any organisations that might have an interest in the submitted work in the previous three  
32 years, no other relationships or activities that could appear to have influenced the submitted work.

33 **Data Sharing:** Anonymised data will be shared on reasonable request to the corresponding author

## References

1. Xu B, Kraemer MUG; Open COVID-19 Data Curation Group. Open access epidemiological data from the COVID-19 outbreak. *Lancet Infect Dis*. 2020 May;20(5):534. doi: 10.1016/S1473-3099(20)30119-5
2. Williamson EJ, Walker AJ, Bhaskaran K, *et al*. Factors associated with COVID-19-related death using OpenSAFELY. *Nature*. 2020 Aug;584(7821):430-436. doi: 10.1038/s41586-020-2521-4. Epub 2020 Jul 8.
3. Mehra MR, Ruschitzka F, Patel AN. Retraction-Hydroxychloroquine or chloroquine with or without a macrolide for treatment of COVID-19: a multinational registry analysis. *Lancet*. 2020 Jun 13;395(10240):1820. doi: 10.1016/S0140-6736(20)31324-6. Epub 2020 Jun 5.
4. Rubin EJ, Baden LR, Morrissey S, Campion EW. Medical Journals and the 2019-nCoV Outbreak. *N Engl J Med*. 2020;382(9):866. doi:10.1056/NEJMe2001329
5. Public Health England. Disparities in the risk and outcomes of COVID-19. [https://assets.publishing.service.gov.uk/government/uploads/system/uploads/attachment\\_data/file/892085/disparities\\_review.pdf](https://assets.publishing.service.gov.uk/government/uploads/system/uploads/attachment_data/file/892085/disparities_review.pdf) (Accessed 20-07-20)
6. Office for National Statistics. <https://www.ons.gov.uk/peoplepopulationandcommunity/birthsdeathsandmarriages/deaths> (accessed 20-07-20)
7. Willett K on behalf of NHS England and NHS Improvement . COVID-19 Patient Notification System (CPNS) <https://www.england.nhs.uk/coronavirus/wp-content/uploads/sites/52/2020/04/C0389-update-to-cpns-reporting-letter-27-april-2020.pdf> (accessed 20-07-20)
8. Woloshin S, Patel N, Kesselheim AS. False Negative Tests for SARS-CoV-2 Infection - Challenges and Implications. *N Engl J Med*. 2020 Aug 6;383(6):e38. doi:10.1056/NEJMp2015897. Epub 2020 Jun 5.
9. Bradley SH, Lawrence NR, Carder P. Using primary care data for health research in England - an overview. *Future Healthc J*. 2018 Oct;5(3):207-212. doi: 10.7861/futurehosp.5-3-207.
10. Zhou F, Yu T, Du R, *et al*. Clinical course and risk factors for mortality of adult inpatients with COVID-19 in Wuhan, China: a retrospective cohort study [published correction appears in *Lancet*. 2020 Mar 28;395(10229):1038] [published correction appears in *Lancet*. 2020 Mar 28;395(10229):1038]. *Lancet*. 2020;395(10229):1054-1062. doi:10.1016/S0140-6736(20)30566-3
11. Goyal P, Choi JJ, Pinheiro LC, *et al*. Clinical Characteristics of COVID-19 in New York City. *N Engl J Med*. 2020;382(24):2372-2374. doi:10.1056/NEJMc2010419
12. Argenziano MG, Bruce SL, Slater CL, *et al*. Characterization and clinical course of 1000 patients with coronavirus disease 2019 in New York: retrospective case series. *BMJ*. 2020 May 29;369:m1996. doi: 10.1136/bmj.m1996.
13. Petrilli CM, Jones SA, Yang J, *et al*. Factors associated with hospital admission and critical illness among 5279 people with coronavirus disease 2019 in New York City: prospective cohort study. *BMJ*. 2020;369:m1966. Published 2020 May 22. doi:10.1136/bmj.m1966

14. Gianfrancesco M, Hyrich KL, Al-Adely S, *et al*. Characteristics associated with hospitalisation for COVID-19 in people with rheumatic disease: data from the COVID-19 Global Rheumatology Alliance physician-reported registry. *Ann Rheum Dis*. 2020;79(7):859-866. doi:10.1136/annrheumdis-2020-217871
15. de Lusignan S, Dorward J, Correa A, *et al*. Risk factors for SARS-CoV-2 among patients in the Oxford Royal College of General Practitioners Research and Surveillance Centre primary care network: a cross-sectional study. *Lancet Infect Dis*. 2020 Sep;20(9):1034-1042. doi: 10.1016/S1473-3099(20)30371-6. Epub 2020 May 15.
16. Izcovich A, Ragusa MA, Tortosa F, *et al*. Prognostic factors for severity and mortality in patients infected with COVID-19: A systematic review. *PLoS One* 2020;15. doi:10.1371/journal.pone.0241955
17. Harrison, EM, Docherty AB, Barr B, *et al*. Ethnicity and Outcomes from COVID-19: The ISARIC CCP-UK Prospective Observational Cohort Study of Hospitalised Patients (5/31/2020). Preprint available at SSRN: <https://ssrn.com/abstract=3618215> or <http://dx.doi.org/10.2139/ssrn.3618215>
18. Usman MS, Siddiqi TJ, Khan MS, *et al*. Is there a smoker's paradox in COVID-19? *BMJ Evid Based Med*. 2020 Aug 11;bmjebm-2020-111492. doi: 10.1136/bmjebm-2020-111492. Epub ahead of print.
19. Farsalinos K, Barbouni A, Niaura R. Systematic review of the prevalence of current smoking among hospitalized COVID-19 patients in China: could nicotine be a therapeutic option? *Intern Emerg Med*. 2020 Aug;15(5):845-852. doi: 10.1007/s11739-020-02355-7. Epub 2020 May 9.
20. Docherty AB, Harrison EM, Green CA, *et al*. Features of 20 133 UK patients in hospital with COVID-19 using the ISARIC WHO Clinical Characterisation Protocol: prospective observational cohort study. *BMJ*. 2020;369:m1985. Published 2020 May 22. doi:10.1136/bmj.m1985
21. Niedzwiedz CL, O'Donnell CA, Jani BD, *et al*. Ethnic and socioeconomic differences in SARS-CoV-2 infection: prospective cohort study using UK Biobank. *BMC Med*. 2020;18(1):160. Published 2020 May 29. doi:10.1186/s12916-020-01640-8
22. Rutter PD, Mytton OT, Mak M, Donaldson LJ. Socio-economic disparities in mortality due to pandemic influenza in England. *Int J Public Health*. 2012;57(4):745-750. doi:10.1007/s00038-012-0337-1
23. Pan D, Sze S, Minhas JS, *et al*. The impact of ethnicity on clinical outcomes in COVID-19: A systematic review. *EClinicalMedicine*. 2020;23:100404. Published 2020 Jun 3. doi:10.1016/j.eclinm.2020.100404
24. Nguyen-Van-Tam JS, Openshaw PJ, Hashim A, *et al*. Risk factors for hospitalisation and poor outcome with pandemic A/H1N1 influenza: United Kingdom first wave (May-September 2009). *Thorax*. 2010;65(7):645-651. doi:10.1136/thx.2010.135210
25. Nyland GA, McKenzie BC, Myles PR, *et al*. Effect of ethnicity on care pathway and outcomes in patients hospitalized with influenza A(H1N1)pdm09 in the UK. *Epidemiol Infect*. 2015;143(6):1129-1138. doi:10.1017/S0950268814001873
26. Office for National Statistics  
<https://www.ons.gov.uk/peoplepopulationandcommunity/birthsdeathsandmarriages/deaths/articles/updati-ngethniccontrastsindeathsinvolvingthecoronaviruscovid19englandandwales/deathsoccurring2marchto28july2020#main-points> (accessed 22/10/20)

- 1 27. Lee KJ, Carlin JB. Recovery of information from multiple imputation: a simulation study *Emerg Themes*  
2 *Epidemiol.* 2012; 9: 3. Published online 2012 Jun 13. doi: 10.1186/1742-7622-9-3
- 3  
4 28. Pearce N. Classification of epidemiological study designs. *Int J Epidemiol.* 2012;41(2):393-397.  
5  
6 doi:10.1093/ije/dys049
- 7  
8 29. Griffith GJ, Morris TT, Tudball MJ, *et al.* Collider bias undermines our understanding of COVID-19 disease risk  
9 and severity. *Nat Commun.* 2020 Nov 12;11(1):5749. doi: 10.1038/s41467-020-19478-2.
- 10  
11 30. Cross M. Show us the data: why clinical outcomes matter. *BMJ.* 2012;344:e66. Published 2012 Jan 10.  
12  
13 doi:10.1136/bmj.e66
- 14  
15 31. Luce T. COVID 19: death certification in England and Wales. *BMJ.* 2020;369:m1571. Published 2020 Apr 21.  
16  
17 doi:10.1136/bmj.m1571
- 18  
19 32. Grant RL. Converting an odds ratio to a range of plausible relative risks for better communication of research  
20 findings [published correction appears in *BMJ.* 2014;348:g2124]. *BMJ.* 2014;348:f7450. Published 2014 Jan  
21  
22 24. doi:10.1136/bmj.f7450
- 23  
24 33. Paling J. Strategies to help patients understand risks. *BMJ.* 2003;327(7417):745-748.  
25  
26 doi:10.1136/bmj.327.7417.745
- 27  
28 34. Ahmed H, Naik G, Willoughby H, Edwards AG. Communicating risk. *BMJ.* 2012;344:e3996. Published 2012  
29  
30 Jun 18. doi:10.1136/bmj.e3996
- 31  
32  
33  
34  
35  
36  
37  
38  
39  
40  
41  
42  
43  
44  
45  
46  
47  
48  
49  
50  
51  
52  
53  
54  
55  
56  
57  
58  
59  
60

1 **Figure Legends:**  
2  
3  
4

5 **Figure 1: Age and deprivation in relation to hospital admission and in whole population**  
6  
7

8 The association of age (**a.**) and deprivation (**b.**) with hospital admission type. Figure 1**c.** shows the inter-relationship  
9 of age, deprivation and ethnicity in the whole population (n=228,632) (Other / Unknown ethnic groups not shown).  
10  
11  
12  
13  
14

15 **Figure 2: Mortality by ethnicity**  
16  
17

18 Crude mortality by ethnic grouping as percentages (**a.**  $\chi^2=184.4$ ,  $p<0.001$ ), within the oldest quintile (**b.**  $\chi^2=92.2$ ,  
19  $p<0.001$ ) or restricted to those with a COVID admission excluding those with a non-COVID death (**c.**  $\chi^2=5.92$ ,  
20  $p=0.115$ , ns), (Other / Unknown ethnic categories are not shown but were included in the analysis).  
21  
22  
23  
24  
25  
26  
27  
28  
29  
30  
31  
32  
33  
34  
35  
36  
37  
38  
39  
40  
41  
42  
43  
44  
45  
46  
47  
48  
49  
50  
51  
52  
53  
54  
55  
56  
57  
58  
59  
60

a.



b.



c.



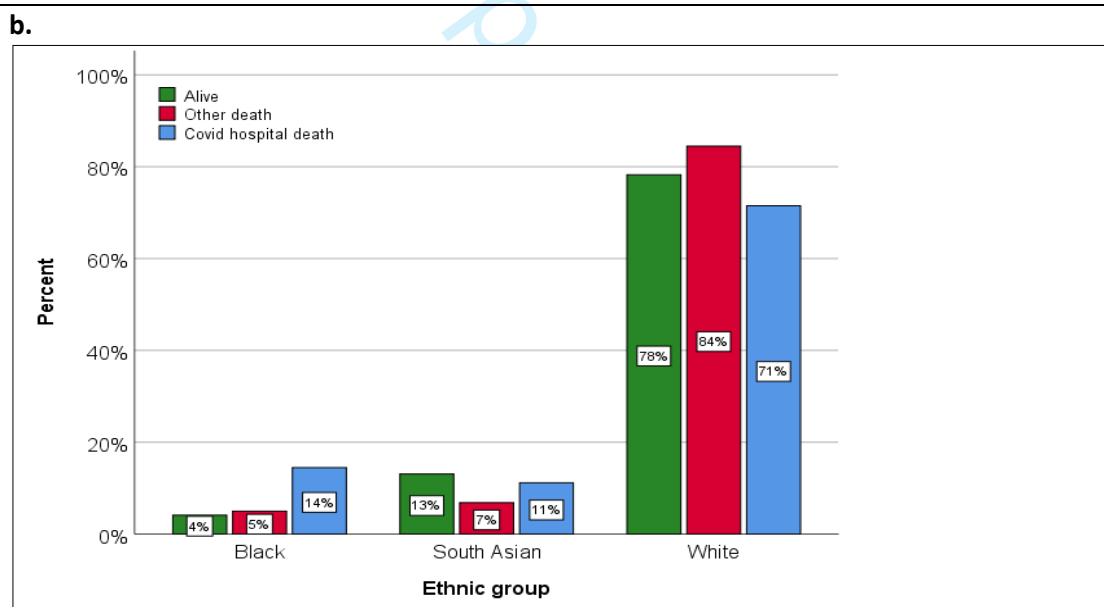



## STROBE Statement—checklist of items that should be included in reports of observational studies

|                              | Item No | Recommendation                                                                                                                                                                                                                                                                                                                                                                                                                                                         | Page No |
|------------------------------|---------|------------------------------------------------------------------------------------------------------------------------------------------------------------------------------------------------------------------------------------------------------------------------------------------------------------------------------------------------------------------------------------------------------------------------------------------------------------------------|---------|
| <b>Title and abstract</b>    | 1       | (a) Indicate the study's design with a commonly used term in the title or the abstract                                                                                                                                                                                                                                                                                                                                                                                 | 1       |
|                              |         | (b) Provide in the abstract an informative and balanced summary of what was done and what was found                                                                                                                                                                                                                                                                                                                                                                    | 3       |
| <b>Introduction</b>          |         |                                                                                                                                                                                                                                                                                                                                                                                                                                                                        |         |
| Background/rationale         | 2       | Explain the scientific background and rationale for the investigation being reported                                                                                                                                                                                                                                                                                                                                                                                   | 5       |
| Objectives                   | 3       | State specific objectives, including any prespecified hypotheses                                                                                                                                                                                                                                                                                                                                                                                                       | 5       |
| <b>Methods</b>               |         |                                                                                                                                                                                                                                                                                                                                                                                                                                                                        |         |
| Study design                 | 4       | Present key elements of study design early in the paper                                                                                                                                                                                                                                                                                                                                                                                                                | 5-6     |
| Setting                      | 5       | Describe the setting, locations, and relevant dates, including periods of recruitment, exposure, follow-up, and data collection                                                                                                                                                                                                                                                                                                                                        | 5-6     |
| Participants                 | 6       | (a) <i>Cohort study</i> —Give the eligibility criteria, and the sources and methods of selection of participants. Describe methods of follow-up<br><i>Case-control study</i> —Give the eligibility criteria, and the sources and methods of case ascertainment and control selection. Give the rationale for the choice of cases and controls<br><i>Cross-sectional study</i> —Give the eligibility criteria, and the sources and methods of selection of participants | n/a     |
|                              |         | (b) <i>Cohort study</i> —For matched studies, give matching criteria and number of exposed and unexposed<br><i>Case-control study</i> —For matched studies, give matching criteria and the number of controls per case                                                                                                                                                                                                                                                 | n/a     |
| Variables                    | 7       | Clearly define all outcomes, exposures, predictors, potential confounders, and effect modifiers. Give diagnostic criteria, if applicable                                                                                                                                                                                                                                                                                                                               | 5       |
| Data sources/<br>measurement | 8*      | For each variable of interest, give sources of data and details of methods of assessment (measurement). Describe comparability of assessment methods if there is more than one group                                                                                                                                                                                                                                                                                   | 5       |
| Bias                         | 9       | Describe any efforts to address potential sources of bias                                                                                                                                                                                                                                                                                                                                                                                                              | 5       |
| Study size                   | 10      | Explain how the study size was arrived at                                                                                                                                                                                                                                                                                                                                                                                                                              | 5       |
| Quantitative variables       | 11      | Explain how quantitative variables were handled in the analyses. If applicable, describe which groupings were chosen and why                                                                                                                                                                                                                                                                                                                                           | 6       |
| Statistical methods          | 12      | (a) Describe all statistical methods, including those used to control for confounding                                                                                                                                                                                                                                                                                                                                                                                  | 6       |
|                              |         | (b) Describe any methods used to examine subgroups and interactions                                                                                                                                                                                                                                                                                                                                                                                                    | 6-9     |
|                              |         | (c) Explain how missing data were addressed                                                                                                                                                                                                                                                                                                                                                                                                                            | 5-6     |
|                              |         | (d) <i>Cohort study</i> —If applicable, explain how loss to follow-up was addressed<br><i>Case-control study</i> —If applicable, explain how matching of cases and controls was addressed<br><i>Cross-sectional study</i> —If applicable, describe analytical methods taking account of sampling strategy                                                                                                                                                              | n/a     |
|                              |         | (e) Describe any sensitivity analyses                                                                                                                                                                                                                                                                                                                                                                                                                                  | n/a     |

Continued on next page

| <b>Results</b>           |     |                                                                                                                                                                                                              |        |
|--------------------------|-----|--------------------------------------------------------------------------------------------------------------------------------------------------------------------------------------------------------------|--------|
| Participants             | 13* | (a) Report numbers of individuals at each stage of study—eg numbers potentially eligible, examined for eligibility, confirmed eligible, included in the study, completing follow-up, and analysed            | 5      |
|                          |     | (b) Give reasons for non-participation at each stage                                                                                                                                                         | n/a    |
|                          |     | (c) Consider use of a flow diagram                                                                                                                                                                           | n/a    |
| Descriptive data         | 14* | (a) Give characteristics of study participants (eg demographic, clinical, social) and information on exposures and potential confounders                                                                     | tables |
|                          |     | (b) Indicate number of participants with missing data for each variable of interest                                                                                                                          | tables |
|                          |     | (c) <i>Cohort study</i> —Summarise follow-up time (eg, average and total amount)                                                                                                                             | n/a    |
| Outcome data             | 15* | <i>Cohort study</i> —Report numbers of outcome events or summary measures over time                                                                                                                          | n/a    |
|                          |     | <i>Case-control study</i> —Report numbers in each exposure category, or summary measures of exposure                                                                                                         | n/a    |
|                          |     | <i>Cross-sectional study</i> —Report numbers of outcome events or summary measures                                                                                                                           | n/a    |
| Main results             | 16  | (a) Give unadjusted estimates and, if applicable, confounder-adjusted estimates and their precision (eg, 95% confidence interval). Make clear which confounders were adjusted for and why they were included | 6-9    |
|                          |     | (b) Report category boundaries when continuous variables were categorized                                                                                                                                    | 6-9    |
|                          |     | (c) If relevant, consider translating estimates of relative risk into absolute risk for a meaningful time period                                                                                             | 6-9    |
| Other analyses           | 17  | Report other analyses done—eg analyses of subgroups and interactions, and sensitivity analyses                                                                                                               | 6-9    |
| <b>Discussion</b>        |     |                                                                                                                                                                                                              |        |
| Key results              | 18  | Summarise key results with reference to study objectives                                                                                                                                                     | 9      |
| Limitations              | 19  | Discuss limitations of the study, taking into account sources of potential bias or imprecision. Discuss both direction and magnitude of any potential bias                                                   | 11     |
| Interpretation           | 20  | Give a cautious overall interpretation of results considering objectives, limitations, multiplicity of analyses, results from similar studies, and other relevant evidence                                   | 9-11   |
| Generalisability         | 21  | Discuss the generalisability (external validity) of the study results                                                                                                                                        | 11     |
| <b>Other information</b> |     |                                                                                                                                                                                                              |        |
| Funding                  | 22  | Give the source of funding and the role of the funders for the present study and, if applicable, for the original study on which the present article is based                                                | 12     |

\*Give information separately for cases and controls in case-control studies and, if applicable, for exposed and unexposed groups in cohort and cross-sectional studies.

**Note:** An Explanation and Elaboration article discusses each checklist item and gives methodological background and published examples of transparent reporting. The STROBE checklist is best used in conjunction with this article (freely available on the Web sites of PLoS Medicine at <http://www.plosmedicine.org/>, Annals of Internal Medicine at <http://www.annals.org/>, and Epidemiology at <http://www.epidem.com/>). Information on the STROBE Initiative is available at [www.strobe-statement.org](http://www.strobe-statement.org).
